# Supplementary material for: Ecological Adaptation of Diverse Honey Bee (Apis mellifera) Populations
Source: PLoS One. 2010 Jun 15;5(6):e11096. doi: 10.1371/journal.pone.0011096 (PMC2886107; doi:10.1371/journal.pone.0011096)
Supplement: Dataset S3 — Expression spreadsheet of quantified midgut proteins, consisting of column A: the Honey bee gene identifier accession number from the NCBI Genbank database, column B: the Drosophila refseq accession number from the fly NCBI reference sequence database, column C: the Flybase accession number, column D: the K code from the Kyoto Encyclopedia of Genes and Genomes database, columns E-L: the 1-sided P values and columns M-T: stock effect values for each population and protein analyzed. The 2-sided P value for population effect for each protein is given in column U and V states if this value was considered significant. Columns W-AC give up to three example peptide sequences with MASCOT scores that were quantitated for each protein identified. (0.36 MB XLS) [file pone.0011096.s003.xls]

## Sheet: Sheet1
				1-Sided P value								Stock effect (measure of relative change log scale)
Amel GI	Ref Seq Accession	Flybase Accession	KEGG code	CH	HI	NZ	CA2	ON	SK1	SK2	CA1	CH	HI	NZ	CA2	ON	SK1	SK2	CA1	Population P value	Significant	Number of times Protein quantitated	Number of Peptides quantified	Example peptide 1	Score	Example peptide 2	Score	Example peptide 3	Score
5834928	NP_008279.1	FBgn0013675	K02261	0.15761	0.0241501	0.0216712	0.13024	0.732408	0.960295	0.995346	0.0434961	-0.244233	-0.538993	-0.569121	-0.304402	0.216515	0.678811	1.15756	-0.396134	0.0236076	YES	48	2	MVIPMK	39	INQLNLISK	59	0	#N/A
48095159	NP_650604.1	FBgn0038485	K01312	0.843035	0.60819	0.579661	0.982264	0.00200926	0.794901	0.0745193	0.961828	0.357366	0.107362	0.0788254	0.788683	-1.60059	0.44422	-0.782891	0.607024	0.0306716	YES	58	11	IVGGSDASSGQFPYQVSLRK	53	QFPYQVSLR	44	IVGGSDASSGQFPYQVSLR	61
48095960	NP_477217.1	FBgn0019624	K02264	0.701177	0.0161612	0.0397923	0.669223	0.931185	0.976423	0.512792	0.0191305	0.216254	-1.02223	-0.752064	0.185211	0.860547	1.27085	0.0215163	-0.780087	0.0396331	YES	45	3	LNDFALAIR	61	VLEMIK	45	QYVTYLNR	53
48096057	NP_650632.1	FBgn0038516	K00286	0.0556892	0.0467702	0.182909	0.100999	0.999473	0.709016	0.904651	0.0119622	-1.1721	-1.38461	-0.662367	-1.01418	3.70848	0.488626	1.45074	-1.41458	0.00678926	YES	22	2	IGFIGGGK	28	ALPDGTPVIR	55	0	#N/A
48096138	NP_524311.1	FBgn0022359	K00008	0.000249915	0.1472	0.236966	0.93631	0.959433	0.767977	0.655768	0.348573	-0.77692	-0.245859	-0.167799	0.336168	0.566445	0.236469	0.129342	-0.0778464	0.0187601	YES	58	12	QLGANETLLIKK	52	IIELFGEEPDK	87	SGGVAVLVGMGPPEVR	81
48096996	NP_477176.1	FBgn0000409	K08738	0.127693	0.122907	0.958931	0.000101658	0.990971	0.97741	0.239963	0.101223	-0.223644	-0.255812	0.386043	-0.811322	0.737801	0.62224	-0.216735	-0.23857	0.000921526	YES	58	6	VGPNLYGVYGR	67	KYIPGTK	33	ADLIAYIEQASK	127
48097144	NP_572723.1	#N/A	K01423	0.987821	0.952706	0.994842	0.191295	0.0585871	0.166284	0.01967	0.896742	0.73708	0.593129	0.841196	-0.272716	-0.873768	-0.416773	-0.976292	0.368144	0.018779	YES	32	2	DPAGFNPDLIWEASSYLK	132	NTENLVIK	32	0	#N/A
48097306	NP_609681.1	FBgn0028920	N/A	0.40268	0.778806	0.0125145	0.987954	0.140639	0.0408378	0.649219	0.999443	-0.101662	0.351705	-1.0527	0.991587	-0.67509	-1.10996	0.24045	1.35567	0.00364615	YES	58	5	VNQGDFMLAGLK	80	FLNNLSLK	57	AITEVLPGLLDDYQTEISNYASPIIANTLNNK	76
48098039	NP_524708.1	FBgn0010100	K01681	0.00299082	0.0224954	0.142177	0.000835968	0.991107	0.999883	0.984403	0.000273669	-0.422776	-0.338056	-0.178065	-0.508882	0.555396	0.903239	0.506757	-0.517613	4.57779e-06	YES	58	19	NDANPATHAFVTSPELVTALSLAGR	108	EFLLK	31	VAGILTVK	60
48098073	NP_650189.1	FBgn0038037	K00517	0.0124194	0.252575	0.231066	0.981455	0.738955	0.0835819	0.507267	0.997424	-0.986884	-0.317391	-0.351423	0.949086	0.416614	-0.912913	0.011915	1.191	0.0123666	YES	58	11	NGTTNSDLIQLMMDTR	144	IYNIHPDAK	40	LNILER	40
48098085	NP_650189.1	FBgn0038037	K07424	1.25895e-05	0.89219	0.191424	0.955763	0.938978	0.0933202	0.448098	0.989677	-1.36925	0.412951	-0.290137	0.532902	0.71389	-0.611123	-0.0600343	0.670806	0.000188931	YES	58	15	FALTEMK	43	TMLTTLFTSSK	74	LVMDTIETR	57
48098315	NP_524402.1	FBgn0016120	K02138	0.198656	0.0185055	0.48864	0.00738373	0.980567	0.958274	0.914017	0.00832916	-0.171588	-0.484217	-0.00644626	-0.529076	0.667421	0.556459	0.439931	-0.472483	0.00605969	YES	58	8	IDWTYYK	40	NMIPFSEMTMEDFSDIQPK	86	IQSFIQEVNSQIAELQQNLDR	107
48099112	NP_610504.3	FBgn0033431	K01444	0.945755	0.211915	0.357697	0.0322049	0.893854	0.958131	0.336053	0.00812229	0.514286	-0.290992	-0.131856	-0.620496	0.62333	0.871497	-0.212046	-0.753723	0.0372548	YES	57	5	AWNVLNNEK	78	FAVEMGFK	34	HSLIGGELATK	74
48100966	NP_726243.1	FBgn0011211	K02132	0.181004	0.041959	0.466466	0.00791629	0.958694	0.975727	0.835938	0.0300998	-0.108086	-0.231723	-0.0111143	-0.305356	0.321505	0.368784	0.18085	-0.214859	0.022559	YES	58	23	LELAQYR	41	VVDALGNPIDGK	96	TGAIVDVPVGEELLGR	97
48102814	NP_573388.1	FBgn0027291	K00030	0.0708997	0.0999951	0.716098	0.00683719	0.713161	0.98631	0.835895	0.164893	-0.30688	-0.303367	0.134369	-0.551891	0.177118	0.710956	0.325687	-0.185993	0.0440312	YES	55	7	LITEEASSR	44	TLYDNVDVVTIR	75	SLNLALR	42
48104663	NP_477269.1	FBgn0020618	N/A	0.999569	0.365252	0.34034	0.991192	0.160113	0.00586543	0.214788	0.966519	0.659543	-0.0739329	-0.0862792	0.485504	-0.291235	-0.791179	-0.233063	0.330642	0.0027546	YES	57	7	YPDMILSSSR	43	LWDLAAGR	66	IWDLETK	45
48105316	NP_523910.1	FBgn0035473	N/A	0.451891	0.258517	0.278167	0.281988	0.364156	0.789446	0.998074	0.0121031	-0.0435779	-0.580692	-0.35193	-0.291195	-0.183303	0.582792	1.97429	-1.10639	0.0297406	YES	15	2	QVLLGPSK	38	LLGLTEMFPEEVR	71	0	#N/A
48107260	NP_609642.1	FBgn0032511	K03965	0.823843	0.0915161	0.920706	0.0135966	0.867508	0.992928	0.20472	0.00126596	0.320984	-0.536836	0.495605	-0.785111	0.57135	1.38435	-0.420809	-1.02953	0.00361572	YES	31	1	FVEPPDAVLDFWDPIEK	72	0	#N/A	0	#N/A
48118838	NP_651172.1	FBgn0051148	N/A	0.000190656	0.204899	0.066139	0.774866	0.664881	0.995749	0.922042	0.0696377	-1.79531	-0.449416	-0.810377	0.382753	0.301488	1.9856	1.06576	-0.680493	0.00348103	YES	52	10	AIEYVK	29	IPIGSTDFSTR	40	TLLLTYDDNR	75
48130977	NP_523774.1	FBgn0010409	K02882	0.691775	0.00555432	0.93569	0.0640738	0.535983	0.730366	0.979172	0.0199582	0.495111	-3.3293	1.69051	-1.84187	0.119377	0.929492	3.86462	-1.92794	0.0228351	YES	24	1	IFAPDAIVAK	52	0	#N/A	0	#N/A
58585098	NP_651912.3	FBgn0039896	N/A	0.638402	0.1511	0.0118292	0.995695	0.778099	0.21225	0.861575	0.179089	0.475514	-1.59467	-3.58336	3.84686	1.57316	-1.77285	2.25889	-1.20354	0.0463428	YES	55	13	KVGDGGPLLQPYPDWSFAK	42	EALPHVPIFDR	63	SLPILHEWK	55
58585108	NP_651912.3	FBgn0039896	N/A	0.682923	0.430688	0.0401326	0.998861	0.294269	0.0542658	0.861699	0.497292	0.468666	-0.190113	-1.93984	3.26979	-0.804526	-2.43356	1.63596	-0.00637705	0.0426562	YES	58	17	QNLEMVAQNDR	79	LTSNTFDYDPR	82	LHVFDLK	33
58585132	NP_523630.1	FBgn0029507	K06497	0.999382	0.588158	0.932407	0.439261	0.238684	0.333881	0.0188252	0.480635	1.07397	0.0789709	0.533583	-0.0502129	-0.351522	-0.212274	-1.05799	-0.0145204	0.0400711	YES	58	1	DFIDFIQK	65	0	#N/A	0	#N/A
58585142	NP_651912.3	FBgn0039896	N/A	0.528534	0.396964	0.00606575	0.999356	0.529585	0.0382479	0.912504	0.548719	0.0764627	-0.309189	-3.07392	3.76558	0.119963	-2.93144	2.22772	0.12482	0.0102563	YES	58	14	NNGVPSSLNVVTNKK	29	LTSNTFDYDPR	82	ESFDVVAQNEETLQMIVSMK	26
58585144	NP_536346.1	FBgn0000079	K01176	0.000284745	0.956633	0.00541713	0.980046	0.338393	0.230463	0.95996	0.943195	-2.07262	1.09192	-1.65865	1.23412	-0.358638	-0.640345	1.53941	0.864804	0.000480899	YES	58	10	IMSSFDFQSK	70	YSYEISNAFR	80	IDNWWDNGSNQIAFSR	122
58585146	NP_729447.1	FBgn0000116	K00934	0.00360717	0.905767	0.236494	0.980957	0.553891	0.348319	0.0325378	0.999235	-0.428399	0.226438	-0.12312	0.338461	0.0316778	-0.0918841	-0.442092	0.488919	0.00134957	YES	58	15	RLVHAVNEIEK	56	VSSTLSGLEGELK	129	IISMQMGGDLGQVYR	123
58585214	NP_001027180.1	FBgn0037913	N/A	0.20708	0.886047	0.0608669	0.999999	0.193396	0.00113927	0.1462	0.999725	-0.298685	0.491188	-0.635215	2.01914	-0.480509	-1.78368	-0.589906	1.27766	3.69024e-06	YES	58	10	NGDEWTFTSSSGDNTYTK	30	VLGDQNLVNTVLQPR	141	LYEFSDNELLVHISTNK	95
62526112	NP_477375.1	FBgn0000556	K03231	0.968486	0.997708	0.0852881	0.999679	0.0375629	0.0015766	0.0953518	0.984331	0.199269	0.345417	-0.162211	0.396569	-0.289554	-0.49796	-0.212917	0.221387	7.38025e-05	YES	58	12	QTVAVGVIK	61	LPLQDVYK	52	EVSSYIK	54
66499163	NP_729447.1	FBgn0000116	K00933	0.0969606	0.953909	0.111068	0.937213	0.56583	0.245928	0.0274198	0.998628	-0.200197	0.290436	-0.209568	0.246159	0.0386841	-0.161883	-0.460173	0.456542	0.00867938	YES	58	2	IGILELIK	65	LIDDHFLFK	80	0	#N/A
66500225	NP_649375.1	FBgn0037146	K12657	0.0334549	0.00503481	0.494604	0.00265417	0.972444	0.995729	0.996417	0.00011628	-0.409871	-0.655527	-0.00332933	-0.663999	0.666012	0.932307	0.959516	-0.825109	2.21316e-05	YES	58	17	QIANDSLTNVGR	103	EDVGDLLSMGK	96	LSLTPAK	49
66500396	NP_996216.1	FBgn0003721	K10373	0.051027	0.586123	0.945222	0.106109	0.878851	0.562333	0.864003	0.00207118	-0.56177	0.0801009	0.596501	-0.43469	0.626096	0.076554	0.556347	-0.939138	0.0351029	YES	50	11	LAEASQAADESER	88	SLEVSEEK	65	IQLLEEDLER	51
66500427	NP_477216.1	FBgn0086904	K03626	0.851744	0.891461	0.640322	0.99968	0.0225167	0.0364224	0.226893	0.73796	0.402834	0.539556	0.148229	1.23907	-1.23733	-0.90653	-0.398583	0.212749	0.0107287	YES	34	2	NPASDTYIVFGEAK	92	NNQNDIVNAIMELTM	96	0	#N/A
66501020	NP_572308.2	FBgn0028685	K03064	0.999088	0.994871	0.874021	0.848108	0.0459233	0.0452435	0.0402275	0.557312	0.789224	0.737649	0.320862	0.223936	-0.688681	-0.681879	-0.734167	0.0330579	0.00600688	YES	39	6	ALQSVGQIVGEVLK	110	EVIELPLLNPELFQR	64	EYVIQEDFMK	47
66505480	NP_477210.1	FBgn0017539	K00234	0.161351	0.04797	0.925258	0.00603802	0.883668	0.928729	0.813704	0.0667532	-0.300667	-0.568487	0.496124	-0.878085	0.56242	0.730652	0.393744	-0.435701	0.0280583	YES	48	4	NTVLATGGYGR	79	AAYGLVAEGFK	108	GSDWLGDQDAIHYMTR	83
66507594	NP_477378.1	FBgn0025352	K07509	0.902576	0.0761649	0.134357	0.033677	0.183775	0.966231	0.977412	0.0996973	0.23756	-0.295664	-0.226636	-0.352485	-0.25784	0.530285	0.587818	-0.223038	0.033509	YES	58	9	TLMLQANK	52	ALDSDLFAQK	78	VGIPDLNK	47
66508439	NP_525105.2	FBgn0000559	K03234	0.955474	0.98736	0.29452	0.971623	0.0696361	0.00723527	0.266751	0.92971	0.285162	0.421688	-0.0996471	0.333274	-0.376773	-0.639893	-0.158486	0.234675	0.0158592	YES	58	24	AYLPVNESFGFTADLR	102	ALLELQLDSEDLYQTFQR	56	TGTITTFK	62
66508562	NP_611208.1	FBgn0034215	K00772	0.157449	0.17379	0.999095	0.264868	0.763841	0.167748	0.151681	0.891994	-0.269012	-0.283281	0.961048	-0.171549	0.295189	-0.413805	-0.427625	0.309035	0.0399455	YES	57	2	GGTIVTIEGPR	64	GLLVVPDSFLDR	77	0	#N/A
66509418	NP_523538.1	FBgn0086347	K10356	0.999983	0.879392	0.685318	0.16284	0.0586616	0.497323	0.00983755	0.859851	1.73653	0.488879	0.195053	-0.393294	-0.890304	-0.00418372	-1.49847	0.36579	0.00149818	YES	45	12	IGELVGILSNK	43	GNDFIMSIIAK	57	MAAGIVLR	31
66509442	NP_731238.1	FBgn0037580	K01277	0.981078	0.182357	0.974852	0.0340602	0.050903	0.403026	0.314844	0.994131	0.731953	-0.36769	0.773591	-0.705233	-0.853599	-0.127342	-0.278309	0.82663	0.0142165	YES	31	10	NLLLTVNR	27	IFISETINELK	50	FPSTDISQTLIEIMEK	51
66509812	NP_477046.1	FBgn0012037	K01283	0.993006	0.946361	0.906035	0.464689	0.0112306	0.232774	0.0604547	0.914282	1.07666	0.765074	0.62501	-0.0393553	-1.4963	-0.470561	-1.02418	0.563654	0.0339981	YES	57	13	NMDTAGLLEYFK	70	SMLELGFSK	62	SAWQEVNQFPWK	93
66510617	NP_726740.1	FBgn0052808	K01324	0.997789	0.549473	0.596915	0.978669	0.0739915	0.000146676	0.900813	0.745673	1.62602	0.0759072	0.150029	1.19239	-1.27281	-3.22247	1.1056	0.345336	0.0019926	YES	55	5	VVAGTINLANPR	97	VESYLDWIK	75	NDIALLK	38
66511551	NP_001097888.1	FBgn0051414	K01201	0.00590134	0.446709	0.00119019	0.998808	0.81766	0.961063	0.120962	0.615895	-1.56671	-0.100753	-2.06532	1.99909	0.804674	1.71407	-0.9456	0.160544	0.000701792	YES	35	6	QPMYYALK	51	TEYYQTFANYILK	108	IPIGGTDFSTR	26
66512625	NP_523899.1	FBgn0001233	K04079	0.856327	0.932096	0.0271597	0.998048	0.119377	0.0651248	0.0289995	0.999708	0.135555	0.213105	-0.27737	0.396642	-0.230676	-0.299458	-0.378569	0.440772	0.00039539	YES	58	22	DASTMGYMAAK	74	SLTNDWEDHLAVK	78	ELFIK	30
66513092	NP_650696.1	FBgn0038587	K00026	0.0455468	0.018162	0.971224	0.00288862	0.897552	0.995283	0.680377	0.023812	-0.224041	-0.312243	0.282427	-0.390044	0.25691	0.543167	0.0951481	-0.251323	0.00127625	YES	58	16	IQEAGTEVVK	78	ELLNAAIPELKK	105	DDLFSTNASIVR	88
66515272	NP_652004.2	FBgn0020367	K02145	0.0606485	0.0128944	0.882798	0.000447431	0.894359	0.980815	0.961348	0.0592348	-0.227551	-0.368996	0.193704	-0.530058	0.278976	0.471923	0.400558	-0.218555	0.00128157	YES	58	27	NFAEFVPLR	50	DINELTNSIYIPK	111	LPANHPLLTGQR	64
66515294	NP_651987.1	FBgn0022097	K02149	0.363243	0.0143171	0.881865	0.00294515	0.934189	0.77544	0.976462	0.0147493	-0.0844483	-0.608102	0.317778	-0.71171	0.552406	0.29791	0.740262	-0.504095	0.00474274	YES	55	7	FATGDFNQVVLQNVTK	138	DVEAANMLDEGDDDILF	56	EAAFSLAEAK	57
66515350	NP_608748.1	FBgn0027571	K00665	0.171663	0.998426	0.0435242	0.990477	0.695444	0.10517	0.368572	0.0597223	-0.266121	0.978477	-0.545528	0.711613	0.217482	-0.539885	-0.1436	-0.412438	0.00614527	YES	51	21	IVNSSGVAFHSK	95	IVSAIPR	31	ESNELAPIGGIFNLAAVLR	69
66515987	NP_650048.1	FBgn0037874	N/A	0.871021	0.999862	0.942517	0.984548	0.00548442	0.000697687	0.0303556	0.997811	0.182685	0.70275	0.287048	0.369708	-0.661504	-0.848018	-0.484774	0.452106	2.21574e-05	YES	58	7	VMKDILSR	27	ALLEYR	37	DIFTGDEMFSDTYK	122
66519936	NP_609299.1	FBgn0028479	K07515	0.932739	0.869614	0.988222	0.0477653	0.24342	0.386078	0.713765	0.00136668	0.622336	0.523578	1.07103	-0.724741	-0.449508	-0.186958	0.36786	-1.2236	0.00866349	YES	58	11	FHGGDINILNDMVK	54	LMQEGVDPIYLDNLTK	64	MNILNSEVMYEIDDVLK	73
66520497	NP_476761.2	FBgn0000150	K00940	0.0022681	0.71626	0.312182	0.987912	0.135595	0.311091	0.241669	0.999962	-0.439531	0.0957622	-0.0816619	0.358456	-0.258046	-0.115089	-0.165266	0.605376	0.000322326	YES	58	7	MLWPTEELLKK	62	EINLWFGEEK	67	YMSSGPVVPMVWEGLNAVK	87
66521282	NP_573114.2	FBgn0030737	N/A	0.996974	0.998112	0.538299	0.853631	0.0617484	0.101857	0.0296068	0.461753	0.398233	0.470484	0.0149862	0.15357	-0.333724	-0.276065	-0.414719	-0.0127647	0.00914525	YES	58	13	LVADGILNAK	82	DVDAVMSEGLGMR	125	AEIPLQVK	63
66521471	NP_995737.1	FBgn0032889	N/A	0.00947032	0.683251	0.848568	0.999767	0.118362	0.256947	0.0638688	0.983128	-0.651593	0.143656	0.312203	1.04627	-0.493243	-0.272505	-0.643273	0.558487	0.00152602	YES	58	5	GLFDDNTFNK	79	GSTVGIVGLGNIGQAIVK	142	VLVTTNTIPSAAINLLR	141
66521738	NP_572319.2	FBgn0086133	K01647	0.000357138	0.0154816	0.62056	0.15051	0.700333	0.970812	0.985683	0.29067	-0.457496	-0.315466	0.0438154	-0.137989	0.104024	0.382614	0.447403	-0.0669059	0.00546916	YES	58	14	SGQVVPGYGHAVLR	93	MLGYEDPQFTELLR	109	SKLPEHVVK	28
66522463	NP_651370.2	FBgn0039311	N/A	0.0353734	0.761835	0.0373493	0.997928	0.292209	0.119894	0.741754	0.948849	-0.518255	0.222374	-0.565883	0.87597	-0.23219	-0.505676	0.277132	0.446529	0.015842	YES	58	13	ALGDDLANWPQDVK	98	LEWLNNEFVQR	82	SQVVSIDELIK	78
66523464	NP_648905.1	FBgn0250814	K00415	0.0184683	0.0798809	0.527371	0.12895	0.802606	0.972617	0.961511	0.00681521	-0.306232	-0.229363	0.0110481	-0.170445	0.192306	0.440995	0.408211	-0.346521	0.0210898	YES	58	7	TVPYIDELK	43	GGNLITTVDR	32	VSSPTSLANDIDK	77
66524161	NP_524802.2	FBgn0015221	N/A	0.962569	0.779201	0.862911	0.878815	0.0648747	0.380746	0.000908723	0.995899	0.716249	0.37005	0.472453	0.504187	-0.90141	-0.201875	-2.00537	1.04572	0.00717597	YES	46	4	YSDEMWENGIDLIK	115	SFANQALK	63	TLELNEFASLATALEIQK	62
66524293	NP_476750.1	FBgn0003517	K02998	0.9983	0.998426	0.23506	0.913681	0.345783	0.00919286	0.00227647	0.988634	0.789881	0.873544	-0.194709	0.369804	-0.142544	-0.998967	-1.21646	0.519449	0.000377026	YES	38	2	FAQHTGATPIAGR	68	SDGVSIINLR	72	0	#N/A
66524947	NP_647882.1	FBgn0035521	K02153	0.445023	0.000833965	0.461032	0.0209359	0.96981	0.946185	0.828964	0.205109	-0.0832632	-2.11242	-0.0602668	-1.33608	1.37393	1.92796	0.755581	-0.465441	0.00882783	YES	18	1	NTILMMAR	52	0	#N/A	0	#N/A
66524972	NP_649139.1	FBgn0022774	K00819	0.00852768	0.0500245	0.924897	0.00525509	0.983454	0.967972	0.592286	0.107459	-0.63536	-0.4816	0.420352	-0.711868	0.868108	0.754365	0.0937587	-0.307755	0.00466124	YES	58	12	AFYSEPHGALGEYLTK	82	LLGWDR	34	GLLGGLVINK	88
66525458	NP_650867.1	FBgn0038774	N/A	0.0202631	0.500585	0.741789	0.0599165	0.956203	0.984002	0.302957	0.0085533	-0.840527	0.000707663	0.299753	-0.629576	0.974188	1.43731	-0.293453	-0.948402	0.0334567	YES	42	3	EYGVPQEEIFQTADLFEK	110	GTNFQLMENVQR	111	EQENEILTWIETVLGEK	72
66525858	NP_651002.3	FBgn0038924	N/A	0.0106714	0.0036065	0.00217594	0.991448	0.39942	0.97569	0.762345	0.992975	-0.274738	-0.362274	-0.386278	0.296738	-0.0457773	0.362851	0.129664	0.279815	0.000323382	YES	58	10	GDVLETEIQGLGR	130	TWVNGNIK	32	NGGQFLLGK	59
66525867	NP_611468.1	FBgn0034497	N/A	0.617075	0.0257836	0.692628	0.000280201	0.969733	0.99534	0.736704	0.00115601	0.0504556	-0.378122	0.0956525	-0.647622	0.507492	0.715393	0.170047	-0.513297	0.000236456	YES	58	10	FGLYEIFK	56	GASAIDVLRK	70	IQTTPGFANTLR	95
66526470	NP_476975.1	FBgn0010516	K03522	0.000293729	0.0236879	0.165524	0.769884	0.760486	0.948829	0.931048	0.568952	-0.666471	-0.415285	-0.199729	0.140875	0.203087	0.474238	0.433214	0.0300711	0.0139933	YES	58	10	LDVSPVSDIIDIK	117	TIYAGNAIQTLK	95	LLYTLADK	70
66526635	NP_733183.1	FBgn0051075	K00128	0.0017181	0.547482	0.241246	0.170385	0.996577	0.365735	0.72954	0.489624	-0.578939	0.0252086	-0.148935	-0.188486	0.816599	-0.100493	0.179735	-0.00469014	0.0352952	YES	58	12	RVSLELGGK	48	VLSLIK	43	FADLIAR	44
66526748	NP_476963.1	FBgn0010410	K02900	0.915269	0.302461	0.998017	0.903526	0.00568825	0.694304	0.483296	0.365796	0.774645	-0.368254	1.77988	0.89043	-3.37971	0.533263	-0.0408541	-0.189403	0.0306057	YES	37	3	LWTLVSEQTR	73	VPVIDLVK	30	DSENKVPVIDLVK	37
66530147	NP_001137674.1	#N/A	K01648	0.111593	0.910307	0.40198	0.0289609	0.594651	0.404195	0.99699	0.00636939	-0.128864	0.159127	-0.0291616	-0.211001	0.0388766	-0.0395475	0.4673	-0.256729	0.0130826	YES	58	19	IYILDLAAK	64	EIIGNFIESLYK	103	LTILNPAGR	57
66530338	NP_652046.1	FBgn0014427	K00831	0.46499	0.654768	0.0774034	0.999086	0.0949637	0.182092	0.225552	0.992887	-0.0363693	0.183235	-0.662535	1.4088	-0.832796	-0.578151	-0.479655	0.99747	0.0132863	YES	58	11	LPEQVLQHVQK	27	IYDVINK	42	GMLQLK	40
66530373	NP_608675.1	FBgn0031418	K00212	0.0208273	0.935979	0.251371	0.686424	0.846745	0.00398085	0.828666	0.968471	-0.479458	0.394328	-0.17244	0.116462	0.360753	-0.97239	0.337113	0.415633	0.0177115	YES	58	10	AQNFSSLHK	48	GMIESPK	40	QIGVTYPED	32
66530423	NP_609285.1	FBgn0012036	K00128	0.0837213	0.2235	0.743355	0.0475878	0.999505	0.1708	0.394981	0.415415	-0.235663	-0.144155	0.123864	-0.297711	0.908771	-0.250584	-0.0701571	-0.0343652	0.0407462	YES	58	15	GVLLNNLASLMER	83	IMSMIESGK	52	EEIFGPVQQILK	78
66531434	NP_476908.1	FBgn0005671	K02147	0.134426	0.00520081	0.9344	0.000536283	0.963985	0.955245	0.941167	0.0245904	-0.169503	-0.448513	0.259126	-0.547001	0.424242	0.402644	0.370368	-0.291363	0.000730495	YES	58	16	GFPGYMYTDLATIYER	146	NFISQGSYENR	69	EHVLAVSR	55
66533113	NP_523835.2	FBgn0023477	K00616	0.00383915	0.605289	0.0324482	0.0288091	0.837583	0.980771	0.980536	0.0525704	-0.441008	0.0477717	-0.335451	-0.321198	0.245162	0.526045	0.527611	-0.248932	0.00676483	YES	58	10	ISLNEAEFR	57	YIHLIDK	25	VSTEVDAR	26
66534660	NP_725653.1	FBgn0010226	K00799	0.00255963	0.511055	0.00255252	0.52446	0.784477	0.985644	0.915031	0.225736	-0.417882	0.00442339	-0.466176	0.00914505	0.173085	0.494506	0.306083	-0.103183	0.0114383	YES	58	13	IDIEEWPK	67	SMVIP	27	VPLLLNKLEEQVK	107
66534750	NP_523366.2	FBgn0004432	K01802	0.100139	0.858243	0.260357	0.97228	0.605785	0.0221492	0.335572	0.989028	-0.190847	0.17917	-0.106573	0.300553	0.0620495	-0.475301	-0.0991192	0.330068	0.0379225	YES	58	9	IVMELR	37	FDDENFTLK	59	KLEAMGSQSGK	47
66534766	NP_609046.1	FBgn0031830	K02265	0.520155	9.44514e-05	0.424208	0.095927	0.991022	0.978166	0.921816	0.000952912	0.00923841	-0.816569	-0.0389846	-0.250115	0.680906	0.579727	0.403709	-0.567912	0.000266646	YES	58	2	LTQVAPL	28	ETFPDPLELATGLEK	109	0	#N/A
66535082	NP_724931.1	FBgn0033520	K11188	0.00024698	0.369907	0.0960903	0.0100843	0.998389	0.877914	0.995942	0.00389796	-1.31141	-0.130313	-0.51735	-0.877175	1.65136	0.633688	1.48189	-0.930691	0.000114246	YES	58	10	ALYIISPDHR	76	VMILPTVK	60	VIDSLQLVDK	98
66535270	NP_647683.1	FBgn0035298	K01028	0.0208689	0.571701	0.0116141	0.985658	0.076621	0.950964	0.979647	0.0114068	-1.26579	0.118194	-1.84316	1.51924	-1.03153	2.20169	1.7089	-1.40754	0.00272216	YES	19	5	IFETVEDAISDMPDGAK	40	NIAQFNGR	28	VIVTMEHK	34
66537940	NP_524356.1	FBgn0001219	K03283	0.924352	0.889131	0.945294	0.994038	0.42673	0.00654867	0.000894949	0.977951	0.153983	0.145571	0.192116	0.28663	-0.0300036	-0.418596	-0.537594	0.207893	0.00163264	YES	58	21	AQIHDIVLVGGSTR	60	TFFPEEVSSMVLVK	105	QVVLDK	31
66546657	NP_725084.2	FBgn0033663	K08056	0.999906	0.981908	0.998769	0.327134	0.000816024	0.0402746	0.00802586	0.988499	0.684823	0.408155	0.605085	-0.0795453	-0.871015	-0.468924	-0.657396	0.378817	2.34031e-05	YES	58	20	DDFQHELNDFGIDFVK	84	ELDDFIK	61	YSVSGYPTLK	64
66547340	NP_524618.1	FBgn0017545	K02984	0.995075	0.935608	0.202521	0.810756	0.346783	0.0194812	0.0505829	0.987566	0.708647	0.453032	-0.239131	0.242581	-0.153149	-0.853006	-0.72976	0.570787	0.0153411	YES	52	7	LLELHGDGAGSK	57	APSMFTNR	50	LLPDATAK	42
66547447	NP_648622.1	FBgn0036334	K04078	0.91095	0.722314	0.954217	0.488628	0.00535288	0.45385	0.00940211	0.999981	0.225723	0.110906	0.31399	-0.00504341	-0.675586	-0.0297335	-0.64886	0.708604	0.000541062	YES	56	6	GEHIPLSIK	42	GGIVLPEK	67	VGDIVLLPEYGGTK	91
66547450	NP_511115.2	FBgn0015245	K04077	0.995845	0.85353	0.879743	0.98442	0.00951537	0.0513825	0.00897483	0.993309	0.295272	0.126925	0.142183	0.247561	-0.396746	-0.27405	-0.403773	0.262628	0.00138427	YES	58	25	IGLQVAAVK	88	TALTDAAGVASLLTTAEAVVAELPKEEPQMPMGGGGMGGMGGMGGMGGMGM	26	TLHDELEVIEGMK	79
66548338	NP_729866.1	FBgn0260441	K02951	0.0486605	0.87565	0.111718	0.982546	0.953977	0.0383199	0.335983	0.485021	-0.877375	0.630661	-0.699945	1.04441	1.85595	-1.56605	-0.370807	-0.0168373	0.0379611	YES	18	2	NALIHDGVVHGLHEAAK	59	DVVMEYVK	55	0	#N/A
66548684	NP_524448.3	FBgn0003178	K00873	0.00453604	0.0765162	0.228533	0.879037	0.810693	0.996547	0.371151	0.0973399	-0.399422	-0.23768	-0.123005	0.181086	0.199897	0.638352	-0.0750133	-0.184215	0.0226202	YES	58	15	SIDMLEK	49	GILPLHFEEPR	64	LADWVK	33
66548968	NP_476964.1	FBgn0010411	K02964	0.993163	0.710018	0.32083	0.96506	0.0441224	0.0305233	0.459807	0.902539	0.414314	0.101098	-0.0849299	0.312526	-0.436559	-0.483192	-0.0256974	0.20244	0.0475221	YES	58	4	IVTIMANPR	81	VMFAMTAIK	33	YANIVLK	46
66549073	NP_572656.1	FBgn0030239	K01057	0.000104959	0.000509381	6.27769e-05	0.649614	0.630336	0.999786	0.989755	0.540788	-1.52615	-1.56761	-1.64332	0.141791	0.189804	3.01723	1.35067	0.0375836	8.69282e-06	YES	28	2	SLPNIK	39	VQPHNGELYWILDEAAAK	45	0	#N/A
66549206	NP_725851.1	FBgn0034417	K01195	0.363085	0.937815	0.0455658	0.996746	0.00407511	0.06405	0.677996	0.999566	-0.168723	0.82789	-0.915389	1.41305	-1.98973	-1.12602	0.337776	1.62115	0.000627028	YES	58	10	TGLIGDVGIVK	92	DYELLQWIGANAYR	112	DSLSELIR	63
66549728	NP_476955.1	FBgn0010348	K07977	0.997908	0.871153	0.299649	0.977756	0.163051	0.0235349	0.0445031	0.937941	0.786225	0.333753	-0.154458	0.561185	-0.396892	-0.820396	-0.699752	0.390335	0.0109711	YES	58	6	LGEIVTTIPTIGFNVETVEYK	75	MLAEDELRDAVLLIFANK	59	NISFTVWDVGGQDK	109
66551115	NP_476595.1	FBgn0001942	K03257	0.989702	0.973155	0.470899	0.918773	0.273366	0.00542813	0.108818	0.8678	0.39738	0.369455	-0.0136669	0.245657	-0.158155	-0.69024	-0.328366	0.177935	0.0252158	YES	58	5	LDQGVHIVVGTPGR	44	GIYAYGFEK	60	LFVLDEADEMLSR	109
66551875	NP_651614.1	FBgn0039576	K00417	0.662239	0.0267373	0.25979	0.124678	0.0936212	0.9987	0.971801	0.0829701	0.322788	-1.96554	-0.401515	-0.714211	-1.58235	3.24518	2.03323	-0.937576	0.0105589	YES	23	2	FEDDILYLTPIIEEMR	36	FEDDILYLTPIIEEMRK	87	0	#N/A
66551889	NP_609792.1	FBgn0025678	K09584	0.987631	0.900981	0.928856	0.592817	0.476964	0.0147449	0.00514668	0.979999	0.425555	0.267568	0.306112	0.0451175	-0.0164058	-0.636912	-0.759945	0.368909	0.0124541	YES	58	9	ILNELGEK	66	TAAGIVDAALNVAGQK	48	GAQLPTILETK	70
66556180	NP_732610.1	FBgn0016700	K07976	0.994266	0.796723	0.130867	0.968737	0.192792	0.755708	0.000539714	0.935852	0.450813	0.161505	-0.218428	0.340952	-0.234866	0.187578	-0.939677	0.252124	0.00414046	YES	58	5	LLLIGDSGVGK	90	LQIWDTAGQER	68	TITSSYYR	48
66556287	NP_524237.1	FBgn0015324	K02150	0.170743	0.0101051	0.928114	0.02066	0.845543	0.919262	0.907536	0.0496594	-0.214417	-0.592115	0.367744	-0.485635	0.345795	0.481832	0.454978	-0.358183	0.0243448	YES	58	11	QVELQK	27	IQSSNMLNQAR	94	KIQSSNMLNQAR	43
66557994	NP_610013.1	FBgn0032833	K02263	0.462498	0.000201206	0.807723	0.00783034	0.977878	0.970378	0.661298	0.178446	-0.02021	-0.897664	0.206782	-0.558174	0.680822	0.63729	0.139295	-0.188142	0.00160348	YES	57	5	LLQVNPIAGISSKN	83	DVVGNGWNGEEAYLDRSDFPLPAIR	74	ANTPDIMALR	65
66559310	NP_524211.1	FBgn0000100	K02941	0.945423	0.904188	0.745252	0.814125	0.0181683	0.0307522	0.313202	0.990577	0.259072	0.235875	0.118183	0.149103	-0.531867	-0.474378	-0.122219	0.366231	0.0445737	YES	58	8	NLLAIAAVTDIEFPEATTIK	76	GDLIEVR	54	AGAIAPLSVIIPAQNTGLGPEK	69
66560290	NP_652013.1	FBgn0029093	K01379	0.00280997	0.702628	0.0143235	0.947539	0.558819	0.27219	0.94662	0.909057	-1.70421	0.349373	-1.47485	1.01008	0.132608	-0.548436	1.47467	0.760771	0.0159369	YES	58	14	GEDYVLK	61	YYTEFDMGNNR	87	FDGILGMAYSK	83
66561330	NP_524675.1	FBgn0003076	K01835	0.00120448	0.239522	0.0145995	0.859711	0.882605	0.902841	0.9287	0.150738	-0.781169	-0.195229	-0.603829	0.281311	0.444959	0.52594	0.572676	-0.244659	0.0177339	YES	55	8	LSGTGSSGATIR	42	NIFDFSSIK	63	ILFQDGSR	30
66563168	NP_727696.2	FBgn0030478	K00814	0.00757459	0.00316433	0.215793	0.00984401	0.988871	0.986829	0.975263	0.119882	-0.526592	-0.67409	-0.184867	-0.531	0.752603	0.754382	0.646844	-0.23728	0.00113134	YES	57	18	VNPAMGAMYVFPR	61	AIEVAER	44	TNIEDIIR	77
66565929	NP_523975.1	FBgn0017579	K02875	0.999532	0.954333	0.978529	0.229224	0.00536595	0.104089	0.261831	0.557245	0.806439	0.445688	0.4967	-0.172794	-0.906294	-0.478954	-0.220785	0.0299992	0.00520423	YES	51	5	IAYVSDGPHK	31	AWEAANINDLWK	103	VLVDGPSSNVPR	104
66566109	NP_651972.1	FBgn0021967	K03966	0.574473	0.00335876	0.775112	0.0212441	0.973335	0.836235	0.909232	0.0126722	0.0520987	-0.879107	0.213666	-0.589714	0.822378	0.380986	0.591632	-0.59194	0.00765558	YES	44	4	YGDIGVPLSVVDAFMK	115	LFYLLDTPVEYFR	81	MVDDEILSILR	83
66566113	NP_524316.1	FBgn0020910	K02925	0.986701	0.842429	0.000274233	0.161908	0.675071	0.641516	0.210999	0.954527	1.01462	0.516815	-1.83174	-0.471755	0.323175	0.293782	-0.546978	0.702089	0.00499252	YES	40	4	TSFMGQLK	42	TITPMGGFPHYGEVNNDFIMIK	60	HGSMGFYPK	60
94158854	NP_723693.1	FBgn0032382	N/A	0.523199	0.00441038	0.295665	0.00695392	0.774864	0.99963	0.904776	0.00592553	0.0285509	-1.47882	-0.2939	-1.29331	0.565766	2.693	0.994519	-1.21581	0.000808124	YES	58	24	GTPQNNVPNWVMGNHDR	71	SPMVDFGYDISDFKDVDPIFGTIK	90	SPMVDFGYDISDFK	127
94400901	NP_609522.1	FBgn0032381	K01187	9.11256e-05	0.136727	0.355436	0.557346	0.922028	0.925912	0.941053	0.0849868	-2.21309	-0.672409	-0.227016	0.0824431	1.19657	1.22929	1.33127	-0.727048	0.00871017	YES	58	18	SLNLAAQK	67	TWLPVNENYK	58	SFQDSDGDGIGDLNGITAR	165
110748738	NP_649599.1	FBgn0037387	N/A	0.984821	0.00673287	0.19288	0.892122	0.757351	0.222872	0.212295	0.956831	1.16833	-1.49636	-0.513235	0.676432	0.557982	-0.614075	-0.644115	0.865038	0.0307287	YES	57	3	NNSNAAELTLVWLR	125	ELNEINELIK	76	SFNDIQEILK	83
110749004	NP_722609.1	FBgn0051974	N/A	0.23826	0.91008	0.00877774	0.933718	0.0400372	0.336416	0.982563	0.660311	-0.109013	0.229933	-0.416107	0.241485	-0.414302	-0.0991977	0.506989	0.0602118	0.0335888	YES	58	17	ATGYDLDHAGEAVK	58	EMFGLILEQIK	94	HTGNELFNK	63
110749015	NP_788887.1	FBgn0030073	K00079	1.61659e-05	0.37907	0.0370208	0.616043	0.981503	0.78687	0.967844	0.225102	-0.949889	-0.0713572	-0.421748	0.0640802	0.675092	0.254642	0.600161	-0.150982	0.00145624	YES	58	10	TEDYRNILDTNLLAPAIFSR	70	EAVLSMK	47	VTSINPGLVTTNMTNDLIK	168
110749017	NP_572746.1	FBgn0030332	N/A	3.38792e-07	0.284776	0.0160708	0.997297	0.993156	0.330738	0.621861	0.982783	-1.92145	-0.214404	-0.828001	1.02141	1.30707	-0.227059	0.160706	0.701727	3.31222e-06	YES	58	8	FNALIDQK	60	SVLDTNLLAPAIFSR	146	IEIPQITLIPHHESFIPK	32
110750077	NP_729798.1	FBgn0036272	K00802	0.0145942	0.224532	0.00474848	0.221211	0.793109	0.904617	0.897822	0.900378	-0.499443	-0.194706	-0.593783	-0.174381	0.246906	0.482191	0.473482	0.259735	0.0404854	YES	46	5	LILNSSMK	47	SLGNLLVLDELQNISEADLIYTETLMQR	77	GSLITVR	28
110750162	NP_728908.1	FBgn0003943	K08770	0.871798	0.8796	0.666723	0.979146	0.718844	0.00586622	0.0220328	0.90653	0.154153	0.178697	0.0651633	0.292243	0.121716	-0.547733	-0.434939	0.1707	0.0335525	YES	58	4	LIFAGK	37	ESTLHLVLR	72	MQIFVK	33
110751158	NP_477034.1	FBgn0011726	K05765	0.999533	0.929216	0.948297	0.557136	0.241402	0.504911	0.00239982	0.0597381	0.574684	0.273149	0.303181	0.0245552	-0.17896	0.00314436	-0.753848	-0.245906	0.00477905	YES	58	6	YIQATDLSEASEEAVEEK	178	MLYSSSFDALK	87	QIDVEVIGPR	66
110751227	NP_610523.2	FBgn0033451	N/A	0.983334	0.544157	0.496066	0.00210638	0.967499	0.704774	0.098476	0.315462	1.21061	0.0687926	-0.00574439	-1.6214	1.33441	0.418664	-1.15726	-0.248082	0.0261088	YES	30	6	MVQVIPK	35	FLLQEDTGFR	56	VGDPVYVGLPEEQPLLISPP	96
110751409	NP_524601.2	FBgn0016123	K01077	0.975792	0.885721	0.628031	0.776821	0.000568455	0.0507981	0.993705	0.974328	1.50317	1.01035	0.455231	0.483143	-5.69531	-1.63009	2.33788	1.53563	0.0137348	YES	18	2	LAFEMFPNAGFAK	62	ELSELEEAILAALQLVK	82	0	#N/A
110754998	NP_727563.1	FBgn0001218	K09490	0.92136	0.991981	0.994943	0.974864	0.0717943	0.00287048	0.0310071	0.663389	0.181441	0.351226	0.377226	0.26358	-0.288107	-0.563119	-0.373288	0.0510409	0.00233801	YES	58	21	IVITNDQNR	69	VFAPEEISAMVLGK	121	LIGDAAK	40
110755333	NP_611805.1	FBgn0034877	K02266	0.977957	0.0162207	0.850066	0.0231694	0.918941	0.773278	0.525012	0.0207114	0.802955	-0.942139	0.471021	-0.850284	0.755367	0.511132	0.0399896	-0.788043	0.0106902	YES	38	1	INYIPGIGYEEHH	62	0	#N/A	0	#N/A
110755553	NP_722744.1	FBgn0001125	K00813	0.0191696	0.00376635	0.510061	0.0997887	0.99964	0.890455	0.893055	0.00128706	-0.27503	-0.405139	0.00367266	-0.17522	0.730815	0.25255	0.25757	-0.389219	0.000543406	YES	58	14	QWLIDVK	57	LALGDNSDVVK	95	NGIDIMLAQSYAK	87
110755727	NP_610830.1	FBgn0033786	N/A	0.998811	0.67497	0.927114	0.0212518	0.716805	0.15194	0.401359	0.0141821	0.792065	0.122834	0.40375	-0.527475	0.216222	-0.389524	-0.0989531	-0.518919	0.00967925	YES	56	5	DIDGSTIYVGR	79	TAIVGGR	42	AFHEGDMLPAK	98
110755842	NP_650488.1	FBgn0038360	N/A	0.906535	0.218109	0.973281	0.930991	0.495842	0.0014623	0.0270528	0.998607	0.474381	-0.293089	0.758062	0.485558	-0.00636356	-1.28108	-1.10132	0.963845	0.00123809	YES	29	1	LLIPIIQVGAI	63	0	#N/A	0	#N/A
110755935	NP_731941.1	FBgn0011217	K06689	0.848171	0.941921	0.241111	0.837186	0.0660971	0.347309	0.0425789	0.999144	0.247275	0.437099	-0.180067	0.269981	-0.570234	-0.148418	-0.821247	0.765612	0.0258804	YES	47	1	SQWSPALTISK	66	0	#N/A	0	#N/A
110756254	NP_650913.2	FBgn0038826	N/A	0.579339	0.995961	0.962414	0.903798	0.44825	0.0320334	0.00971385	0.599328	0.0319982	0.491903	0.323541	0.218783	-0.0323212	-0.469657	-0.602457	0.0382101	0.0262265	YES	58	5	TGYPLDVTTGQR	80	LIQYGLDEK	63	LFVGNIPK	42
110756296	NP_995645.1	FBgn0031968	N/A	0.999996	0.917519	0.743398	0.00469978	0.38015	0.507085	0.0125864	0.400274	1.59506	0.509711	0.232361	-0.921432	-0.151411	0.00881674	-1.19616	-0.0769438	0.000271931	YES	56	5	MINTLTEQQVTQSVTYPVR	37	AGLAANDINVMK	94	VYVDVPK	52
110756499	NP_610747.1	FBgn0033699	K02949	0.995137	0.966237	0.984065	0.000438102	0.14012	0.194747	0.518547	0.29679	0.969744	0.757876	0.892523	-1.35513	-0.615742	-0.490483	0.0276511	-0.186437	0.00209099	YES	57	3	QPTIFLNR	65	ILTGVVQK	65	EALEGTYIDK	92
110756573	NP_611542.2	FBgn0034580	K01183	0.975245	0.442332	0.902586	0.995114	0.0439813	0.227174	0.0118045	0.94459	0.795162	-0.0630898	0.577369	1.09113	-1.08798	-0.496851	-1.40976	0.59402	0.0122014	YES	51	6	YNFDGFDVDWEYPNQR	31	ENFVSLLK	70	NVVAFLQK	41
110756701	NP_651754.1	FBgn0039728	K05401	0.999	0.168962	0.304701	0.0151127	0.636237	0.478466	0.237218	0.940378	1.39035	-0.466443	-0.244282	-1.02631	0.227982	-0.036538	-0.499894	0.655136	0.0176078	YES	55	2	ITYLEMVIYSSTLPIK	31	YLNLSGNK	59	0	#N/A
110756765	NP_731570.2	FBgn0037897	N/A	0.956962	0.980891	0.0898253	0.96991	0.232471	0.0134139	0.0480465	0.994755	1.78047	2.46034	-1.51975	1.95294	-1.15752	-3.38569	-2.63309	2.5023	0.00580195	YES	35	1	SLLVLK	29	0	#N/A	0	#N/A
110757077	NP_524226.1	FBgn0087013	N/A	0.652404	0.134871	0.698286	0.0232912	0.874035	0.0668717	0.994515	0.000605764	0.246818	-0.694081	0.203744	-0.858241	1.01166	-0.964244	2.47968	-1.42534	0.00623263	YES	16	4	AIDTEPESDVLLELLYSLAK	52	VLIDLAESTPK	58	NILTPYLDAIMAK	30
110757341	NP_572713.1	FBgn0027359	K10836	0.999322	0.879116	0.905289	0.776292	0.17925	0.0335367	0.137949	0.186716	1.55984	0.644956	0.692644	0.3686	-0.554658	-1.39849	-0.92021	-0.392676	0.0239897	YES	32	1	FAQLLQK	43	0	#N/A	0	#N/A
110757349	NP_523761.2	FBgn0028424	N/A	3.69584e-05	0.0852713	0.0245822	0.928049	0.671575	0.756421	0.987113	0.842803	-2.19283	-0.813352	-1.11543	0.813858	0.346319	0.610097	1.86987	0.481465	0.00143193	YES	46	2	TVNLVLK	54	DLLDPLINK	58	0	#N/A
110757651	NP_608326.1	FBgn0031037	N/A	3.63657e-05	0.660936	0.758036	0.00421823	0.997251	0.977216	0.609278	0.00793728	-0.965849	0.107265	0.176547	-0.652579	1.0156	0.749155	0.0984837	-0.528622	0.000105197	YES	57	6	DGVLTVEAPLPAIGTGEK	80	LRFDVSQYTPEEIVVK	50	LIPIAHQ	40
110758214	NP_612021.1	FBgn0035121	N/A	0.96148	0.836334	0.179821	0.999316	0.189827	0.0685615	0.0156499	0.959915	0.278172	0.169734	-0.158932	0.543078	-0.208967	-0.358559	-0.526653	0.262127	0.00506514	YES	58	18	LIELENAAK	69	QVISGDTIVIR	79	LIEEYK	34
110758259	NP_651674.3	FBgn0039640	K11140	0.958095	0.798409	0.811694	0.904592	0.154553	0.00510316	0.0336861	0.999579	0.646236	0.341807	0.362799	0.504554	-0.568409	-1.48858	-1.0411	1.24269	0.00386104	YES	58	29	RLDDYMK	52	YLLQTLEK	60	EVDYIPWQTTFR	88
110758263	NP_573118.2	FBgn0260450	N/A	0.00284815	0.0652449	0.995913	0.735913	0.301921	0.380764	0.521583	0.868139	-1.18702	-0.634669	1.53766	0.268503	-0.325627	-0.182512	0.0556511	0.46802	0.0148946	YES	14	1	LAFVQSR	36	0	#N/A	0	#N/A
110758308	NP_524352.1	FBgn0001200	K11254	0.944741	0.41087	0.480651	0.0336916	0.53874	0.897637	0.794875	0.00270179	0.505236	-0.0782938	-0.0168961	-0.604189	0.0463258	0.613355	0.396635	-0.862173	0.0443825	YES	58	5	VFLENVIR	64	DNIQGITKPAIR	42	TVTAMDVVYALK	100
110758626	NP_524445.1	#N/A	K03954	0.241243	0.00447802	0.920529	0.0125371	0.927471	0.951356	0.969976	0.00491909	-0.191446	-0.987744	0.487862	-0.739335	0.612784	0.729623	0.857661	-0.769405	0.00195223	YES	35	2	FLTDLENATK	45	LIVVDGPPAVGK	86	0	#N/A
110758754	NP_722609.1	FBgn0051974	N/A	0.00195164	0.279229	0.014507	0.989111	0.82729	0.171121	0.97017	0.787221	-0.910603	-0.198116	-0.758556	0.73467	0.441082	-0.43405	0.899567	0.226005	0.00597646	YES	55	7	EIQFYNSMAK	63	DTLDNELDYMLDLYYSSFIK	86	NTEETLNLVAK	86
110758879	NP_001027037.1	FBgn0001402	N/A	0.792446	0.17174	0.810355	0.00324852	0.707264	0.988119	0.666919	0.001783	0.201065	-0.261063	0.242425	-0.722736	0.206348	0.881844	0.164532	-0.712415	0.00572193	YES	58	28	NIPLPPTANQR	46	LSNVAVSDSGLYR	76	QTVPQGSIAEVK	64
110758921	NP_651601.1	FBgn0039562	K09487	0.93116	0.970731	0.345632	0.976303	0.339868	0.00361717	0.0096357	0.999156	0.304651	0.430909	-0.089187	0.426409	-0.125603	-0.853408	-0.735097	0.641326	0.00130202	YES	58	25	LLLFQSSTQK	67	HELINNLGTIAK	97	ETASFADSVEQLMR	121
110758938	NP_733364.1	FBgn0028646	N/A	0.627241	0.3428	0.632136	0.452656	0.0149476	0.512966	0.998737	0.0914185	0.137464	-0.18812	0.155971	-0.0514509	-1.49864	0.0217738	1.89573	-0.472731	0.0489511	YES	38	4	LTVNDFVR	33	DLGLFGLYK	59	IVYSDLVALTPEQYFK	40
110759146	NP_477158.1	FBgn0015623	K00327	0.69	0.259467	0.205832	0.981164	0.205673	0.0277492	0.588176	0.9984	0.143785	-0.213717	-0.261289	0.643485	-0.356456	-0.891386	0.096869	0.83871	0.0295544	YES	55	9	MSELDAANYIK	86	VFELGLGDDDANIEDDFITWK	60	GVTTSWLK	42
110759634	NP_001097360.1	FBgn0085224	K00599	0.00321066	0.532609	0.0319674	0.915286	0.791748	0.19352	0.888727	0.888743	-1.23782	0.0447665	-0.999487	0.793099	0.590542	-0.737802	0.97816	0.568544	0.0411398	YES	28	1	IFVQGK	42	0	#N/A	0	#N/A
110759783	NP_523388.1	FBgn0250788	K06115	0.999976	0.743858	0.889184	0.0240499	0.62323	0.0788803	0.0305859	0.617361	0.698133	0.11476	0.214339	-0.33208	0.0765169	-0.347855	-0.468437	0.0446226	0.00200477	YES	57	20	DIEDVEIMK	63	QQMIETQMAVK	44	EVDDLEQWIAER	102
110759938	NP_726911.1	FBgn0000635	K06491	0.670092	0.00452364	0.569465	0.0288619	0.798578	0.759222	0.990366	0.0923792	0.190992	-1.35957	0.0823649	-0.917702	0.492516	0.503281	1.55728	-0.549171	0.022207	YES	39	8	NLYSDTFYK	49	MITQIGNGPR	75	LISDMQWIDPQDR	76
110760082	NP_651408.1	FBgn0039349	K00139	5.76945e-06	0.428459	0.33152	0.45563	0.652164	0.987227	0.868732	0.381514	-0.946554	-0.0394503	-0.0953226	-0.0226565	0.118617	0.696598	0.34474	-0.0559716	0.00231638	YES	58	15	LAINSAFEAFK	104	NVPDMDVEDTK	35	NWYNLIVK	44
110760134	NP_569995.1	FBgn0023529	K09486	0.704836	0.842114	0.997797	0.595193	0.0160104	0.889512	0.0256424	0.396798	0.218871	0.360799	1.02947	0.0776112	-1.04987	0.640635	-1.19652	-0.08099	0.0310705	YES	24	3	ISEAVITVPGFFNQIER	49	VAIVSPGVPMEIALNK	58	ETALNNLETFIIDAQQK	72
110760646	NP_650929.1	FBgn0038842	N/A	0.530388	0.147823	0.390101	0.00025041	0.692586	0.994427	0.952814	0.0081384	0.0399254	-0.650801	-0.181178	-2.11612	0.397942	2.40385	1.43427	-1.32789	0.00235057	YES	43	3	LNALPVSAR	52	IGGIDIDFLGANPFQGGVR	49	IIVQPQKPR	36
110761078	NP_608996.1	FBgn0031781	K05755	0.966776	0.470162	0.618631	0.0858276	0.298899	0.980468	0.268361	0.00668732	0.747537	-0.0362488	0.139178	-0.589458	-0.300456	1.38752	-0.370205	-0.977871	0.0355097	YES	42	1	ELLLTPILISR	70	0	#N/A	0	#N/A
110761202	NP_726511.1	FBgn0035094	N/A	0.999977	0.7286	0.961216	0.226485	0.280316	0.0920842	0.00601516	0.723673	0.950792	0.144748	0.426846	-0.167274	-0.189343	-0.438559	-0.848596	0.121386	0.00163989	YES	58	14	LFTSVAPQEK	78	YLLER	28	DPWFDLTLNR	70
110761504	NP_523820.2	FBgn0041712	N/A	0.709629	0.579342	0.948649	0.00185143	0.880781	0.513543	0.798873	0.00399277	0.142316	0.0572607	0.474107	-0.810091	0.465327	0.0134052	0.332039	-0.674365	0.0137896	YES	58	3	FTDTYSLK	32	YVVPDDQVLFGK	64	AALVTPIVDVGK	106
110761968	NP_722721.1	FBgn0000579	K01689	0.000827354	0.653721	0.44909	0.467919	0.971214	0.969092	0.253348	0.0404605	-0.566865	0.0749165	-0.0243059	-0.0143203	0.499003	0.494344	-0.172755	-0.290017	0.0196988	YES	58	12	SNLDVTSQSDIDNFLLK	161	GNPTVEVDLVTDDGLFR	113	LAMQEFMILPTGASSFSDAMK	109
110762229	NP_650703.1	FBgn0038595	K01310	0.0219875	0.899791	0.00648511	0.988687	0.279508	0.140339	0.739824	0.995617	-1.07865	0.748465	-1.49122	1.27529	-0.46234	-0.863919	0.511884	1.36048	0.00289819	YES	58	11	QTGQAVLSGWGSISK	119	ITDGVPAAR	56	VIAGKYELDK	80
110762605	NP_611051.2	FBgn0034035	K00966	0.606268	0.946951	0.244569	0.0072495	0.0551801	0.49341	0.997596	0.178043	0.098219	0.619592	-0.278594	-1.02028	-0.783638	-0.0110767	1.71061	-0.334841	0.0247835	YES	21	2	SVILIGGPSK	52	NEIIL	25	0	#N/A
110762641	NP_733361.1	FBgn0015222	N/A	0.608863	0.257484	0.30608	0.985725	0.0202662	0.267119	0.578068	0.997712	0.108981	-0.296707	-0.225759	0.942248	-1.35279	-0.403057	0.127571	1.09951	0.037862	YES	52	2	VLEYLLMR	51	HWLDMDK	37	0	#N/A
110762902	NP_726631.1	FBgn0010217	K02133	0.380566	0.00336827	0.81234	0.000622549	0.975445	0.990456	0.806939	0.010959	-0.0321922	-0.333877	0.105492	-0.375388	0.33024	0.397956	0.14447	-0.236702	0.000473445	YES	58	27	VVDLLAPYAK	64	IPVGAETLGR	30	LVPLEETIK	65
110763386	NP_729808.1	FBgn0036290	K00011	0.999748	0.920635	0.599833	0.00054982	0.0326146	0.936933	0.418686	0.110027	1.03413	0.444767	0.0790389	-1.00183	-0.809811	0.671344	-0.0894255	-0.32821	0.000533825	YES	58	12	REDLFITTK	50	QNIDIFDFK	81	DYPFSIEF	36
110763596	NP_722915.1	FBgn0051954	K09634	0.83014	0.852443	0.988653	0.0303042	0.0223868	0.956849	0.449502	0.0130641	0.749638	0.928825	2.03357	-1.55294	-2.38255	2.08448	-0.15157	-1.70945	0.00841258	YES	53	4	DTFEFDESTKPVQLYQGDSASLVGK	91	YPGVYTDVAYYR	77	VSVPLVSK	46
110764584	NP_572297.1	FBgn0040069	K01435	0.998303	0.780177	0.00389277	0.994252	0.0024142	0.753183	0.509721	0.42312	0.896223	0.25032	-0.889104	0.782333	-1.31843	0.321349	0.0110505	-0.0537366	0.000746516	YES	57	6	VNLYMEK	47	DNGPLTLSK	54	AVVFDNVR	60
110764717	NP_652044.1	FBgn0001248	K00031	2.03543e-05	0.00850261	0.124365	0.450057	0.990277	0.888596	0.996183	0.0939182	-0.571981	-0.350757	-0.165851	-0.0166819	0.473461	0.243285	0.549974	-0.16145	0.00024504	YES	58	13	VIWDSIK	54	YNVGIK	27	NIWYEHR	36
110765081	NP_726945.1	FBgn0028325	K00161	0.116218	0.171621	0.816469	0.00441517	0.882272	0.964519	0.68012	0.0619497	-0.213937	-0.186841	0.177271	-0.493556	0.326536	0.52326	0.129253	-0.261985	0.048013	YES	57	4	ILNANLITPEEIK	114	GPIVLETVTYR	61	GDYIPGIWVDGMDVLAVK	92
110767298	NP_610144.1	FBgn0032987	K02889	0.999427	0.488572	0.937706	0.00139909	0.141804	0.144236	0.690165	0.781921	0.715827	-0.00666876	0.359558	-0.68309	-0.367993	-0.331182	0.155276	0.158272	0.00408745	YES	48	2	VGDIVDIK	48	ENPISLAPIPYEFIA	85	0	#N/A
110767535	NP_476643.1	FBgn0002789	N/A	0.0971845	0.882165	0.457697	0.444303	0.927005	0.564111	0.832762	0.000266733	-1.28888	1.22371	-0.112993	-0.139838	1.83951	0.234362	1.27071	-3.02658	0.022072	YES	36	3	KFPPGELFEDVIK	61	ISPGSISK	32	EAQEWIESILGK	108
110767793	NP_609322.1	FBgn0032160	K01825	0.00216983	0.827804	0.0139132	0.878094	0.41652	0.58914	0.924436	0.68654	-1.60002	0.636898	-1.58094	0.801868	-0.205619	0.258192	1.36823	0.321387	0.0328101	YES	14	1	LYIEALK	44	0	#N/A	0	#N/A
110768236	NP_476639.1	FBgn0002772	K01376	0.456896	0.185549	0.350013	0.0919386	0.607405	0.995632	0.7384	0.00310778	-0.0365351	-0.339199	-0.145586	-0.470934	0.142423	1.42478	0.337156	-0.912108	0.0401398	YES	58	3	ALNLNPTNATIEK	90	QENGTMLGAELSHTLLALGEK	94	LSDAEVEEVLK	90
110768510	NP_524079.1	FBgn0014002	K09580	0.892321	0.915877	0.908724	0.978913	0.0509394	0.00704478	0.0737552	0.987063	0.25011	0.309111	0.299692	0.431748	-0.50393	-0.77525	-0.448126	0.436644	0.0115042	YES	58	10	VSSYPTITLYK	63	DSENLVIAK	64	RHFLTQDLPEDWDK	27
110769113	NP_611126.1	FBgn0034126	N/A	0.189251	0.916169	0.00624781	0.998532	0.102439	0.0931844	0.699606	0.985497	-0.600218	1.04682	-1.9436	2.19447	-1.31057	-1.37774	0.540837	1.45001	0.00305874	YES	58	21	DMIVDVEAMPEFR	110	LRSDDFQHIVK	48	YMYSDEFHDLVR	58
110769331	NP_650703.1	FBgn0038595	N/A	0.00211008	0.000990526	0.914769	0.0174572	0.984922	0.839293	0.995044	0.0478354	-1.37186	-1.65055	0.705386	-1.03039	1.53698	0.695192	1.85767	-0.742428	0.00025676	YES	58	6	LGGAVQPINLPSIPSTPSGR	126	YVGDVAPYDIALLK	111	TSTPLMPSK	51
110771708	NP_610939.2	FBgn0033912	K02973	0.241172	0.975907	0.949713	0.0625995	0.000558231	0.340052	0.82391	0.93675	-0.330662	1.14886	0.88748	-0.771656	-2.36807	-0.299909	1.07566	0.658295	0.00925698	YES	24	4	VANVSLLALYK	82	ITAFVPR	32	ANPFGGASHAK	58
110772145	NP_652035.1	FBgn0010612	K02140	0.87525	0.000503554	0.787306	0.100142	0.824516	0.996029	0.841087	6.17829e-05	0.331433	-1.1071	0.259225	-0.420047	0.422229	1.19605	0.476127	-1.15792	7.04618e-05	YES	52	4	VELVPPK	50	NGFQNLITSVK	86	IVGEVSTLIK	54
110773163	NP_001097859.2	FBgn0038886	K00699	0.57184	0.0151684	0.353963	0.0953987	0.995251	0.301662	0.983098	0.0148804	0.101312	-1.48633	-0.231096	-0.77621	2.19036	-0.448284	1.77351	-1.12326	0.0116091	YES	34	2	YLDLPNLPDIR	56	NIYALAQK	43	0	#N/A
110773623	NP_477030.1	FBgn0000316	K03750	0.0010182	0.488291	0.223183	0.997091	0.406341	0.229128	0.901417	0.623885	-1.28279	-0.0123939	-0.295626	1.25717	-0.145873	-0.495206	0.8577	0.117014	0.0135379	YES	34	4	NANALLMLPAR	87	DFSIPIIVK	47	ESLYPMISVEEALQLIHK	76
110774476	NP_523376.1	#N/A	K02966	0.999502	0.345764	0.914147	0.186574	0.851986	0.161637	0.0903555	0.0454993	1.08121	-0.136479	0.473698	-0.289824	0.500329	-0.474367	-0.648953	-0.505615	0.0163439	YES	57	5	SPIGVGAVTK	81	AFAAFLK	29	LQETLVL	30
110775497	NP_001097337.1	FBgn0034128	N/A	0.871692	0.382787	0.400224	0.00943683	0.305845	0.964459	0.958667	0.00242227	0.486413	-0.141657	-0.12025	-1.06953	-0.332064	1.20628	1.16084	-1.19003	0.0109079	YES	58	12	LRSPTAQSLVDK	86	HGVHLDVVK	62	YFQSSEFK	63
110775909	NP_611086.1	FBgn0001124	K00813	0.000144951	0.233303	0.0176697	0.537964	0.668334	0.960788	0.985109	0.456984	-0.712431	-0.154368	-0.44331	0.0186636	0.12553	0.537782	0.646953	-0.0188176	0.00583777	YES	57	8	NFGLYNER	44	VAAEFLNR	69	LVFLNGGFK	65
110777113	NP_536731.1	FBgn0000261	K03781	0.0552342	0.00230609	0.33254	0.388953	0.97835	0.98576	0.414878	0.25626	-0.373801	-0.761825	-0.111944	-0.0678477	0.733939	0.803059	-0.0771723	-0.144409	0.0260954	YES	58	5	AAELSASNPDYAIQDLYDAIAK	163	DPIYFPSFIHTQK	66	FYTEEGVWDLVGNNTPIFFIK	67
110777657	NP_726740.1	FBgn0052808	K01324	0.944646	0.00866819	0.98265	0.900562	0.112061	0.0261459	0.737322	0.944769	1.26401	-2.22431	1.75706	1.12011	-1.3535	-2.45475	0.720652	1.17073	0.0109971	YES	40	4	VESYLDWIK	75	VVAGTINLANPK	108	NDIALLK	38
48094341	NP_647860.1	FBgn0035499	N/A	0.30542	0.860914	0.688885	0.865342	0.604235	0.883331	0.0352388	0.0805054	-0.217168	0.512766	0.193374	0.432025	0.174782	0.847418	-1.384	-0.559202	0.277362	NO	34	6	TITGENINTNGDMDNFYEILK	111	LVNDIK	32	NFTEEQLR	34
48094573	NP_524655.1	FBgn0025592	N/A	0.957219	0.920297	0.0055147	0.58664	0.237821	0.715651	0.585312	0.205794	2.22843	2.00248	-3.70214	0.282523	-1.33519	1.14513	0.405577	-1.02681	0.103048	NO	48	3	ASTPIENLIEIFDTIK	134	EQVANALLEGSSDLIGALK	159	GFAAVAK	48
48094929	NP_001104459.1	#N/A	N/A	0.326209	0.558099	0.674192	0.291203	0.778997	0.129908	0.814868	0.202746	-0.359392	0.138623	0.450858	-0.488118	0.891969	-1.40585	1.48497	-0.713056	0.833315	NO	29	3	LSDQIIDTLIR	61	LMIGMFDK	28	EFLWDVFQR	60
48094957	NP_524696.2	FBgn0025814	K00799	0.501268	0.189597	0.255404	0.0431387	0.620635	0.984643	0.854747	0.0155632	0.00117124	-0.37775	-0.286679	-0.692489	0.173579	1.33813	0.62515	-0.781111	0.100456	NO	39	3	VATNDPEIER	52	SLNTSLIGTEIFK	98	TFSNPEDAITLK	66
48095068	NP_523385.1	FBgn0024238	N/A	0.994861	0.593228	0.291615	0.479959	0.0615044	0.48672	0.292717	0.849113	0.567622	0.0577059	-0.127208	-0.0108029	-0.505473	-0.0113038	-0.172094	0.201554	0.22811	NO	49	6	YAISLAR	36	HLLPIDPEGK	59	AEIMLQQAAK	64
48095525	NP_523795.2	FBgn0003887	K07375	0.01456	0.711475	0.474342	0.568081	0.881076	0.395984	0.644093	0.327287	-0.467781	0.128907	-0.0149	0.0372821	0.372967	-0.083411	0.11658	-0.0896447	0.500311	NO	58	14	EVDEQMLNIQNK	91	FPGQLNADLRK	42	NSSYFVEWIPNNVK	114
48096291	NP_722715.1	FBgn0021906	K00411	0.565112	0.158166	0.542412	0.00412611	0.799928	0.55653	0.979217	0.0937252	0.058472	-0.421397	0.0405607	-1.03439	0.529454	0.0878366	1.21077	-0.471305	0.0755454	NO	29	2	STNFLPLLK	59	STSVISNGMQPVTGR	116	0	#N/A
48096310	NP_476596.1	FBgn0001961	K05757	0.356441	0.756368	0.149182	0.88775	0.530087	0.703588	0.6102	0.0271358	-0.256054	0.47894	-0.727367	0.858213	0.0717507	0.459521	0.261347	-1.14635	0.432176	NO	24	2	LLENSIAGLK	65	VLVAGSTDYK	56	0	#N/A
48096523	NP_732312.1	FBgn0020238	K06630	0.293057	0.555625	0.729388	0.669681	0.643843	0.0924566	0.879179	0.0979758	-0.140569	0.0408071	0.18258	0.123089	0.1557	-0.546685	0.505422	-0.320344	0.641708	NO	52	7	EAAENSLVAYK	97	EQLPDVEDQDVS	36	AAFDDAIAELDTLSEESYK	181
48096664	NP_609187.1	FBgn0031992	K08762	0.170661	0.433351	0.0993864	0.269066	0.805168	0.984795	0.515166	0.0471514	-0.269117	-0.0529353	-0.408309	-0.180771	0.376916	0.971566	0.0167486	-0.454098	0.256502	NO	58	3	VEELISIIGK	78	VEELISIIGKK	65	ELSAPASDADLLELYSLYK	183
48096676	NP_650004.1	FBgn0037818	K01436	0.282235	0.199357	0.151907	0.328692	0.864871	0.735386	0.563009	0.608371	-0.20358	-0.32928	-0.403169	-0.162661	0.586054	0.335563	0.0842155	0.092857	0.843396	NO	58	7	IIAAVANV	38	SLDLPFK	61	GIEIYMK	48
48096769	NP_724834.1	FBgn0023175	K02727	0.838137	0.799974	0.728218	0.952975	0.63112	0.00669117	0.0995085	0.910394	0.268185	0.280859	0.188133	0.492451	0.134822	-1.18864	-0.526153	0.350339	0.126121	NO	46	3	IIYLVHDELK	55	SQYGIGIPLK	67	AVENGGTVIGLR	65
48096956	NP_651868.1	FBgn0039849	N/A	0.0873218	0.425907	0.160085	0.964601	0.800517	0.195179	0.706884	0.549973	-0.613002	-0.0969901	-0.430726	0.870882	0.516962	-0.640928	0.343233	0.050569	0.382824	NO	31	4	IAADELIQLANK	108	IGTYQIAIVAK	76	AIGDYGAQEILK	86
48097086	NP_476885.2	#N/A	K06630	0.557589	0.508166	0.595318	0.758814	0.836312	0.228142	0.277123	0.278565	0.0455137	0.00669372	0.0782092	0.248364	0.470238	-0.37475	-0.297472	-0.176798	0.948103	NO	46	9	YLAEVATGETR	94	VISSIEQK	69	AYQDAFEISK	70
48097100	NP_523528.1	FBgn0040064	K07508	0.0825196	0.0474612	0.854622	0.807471	0.94397	0.221728	0.119522	0.96611	-0.212108	-0.287851	0.180093	0.137461	0.380279	-0.181992	-0.282694	0.266811	0.0721806	NO	58	12	GIFIVAAK	63	SGIPLEK	43	FNEEIAPVTITVK	83
48097366	NP_651969.1	FBgn0020255	K07936	0.422961	0.640861	0.916095	0.927306	0.674387	0.0263995	0.143276	0.836136	-0.0781346	0.161411	0.59519	0.63353	0.258325	-1.27606	-0.666679	0.372414	0.310677	NO	44	3	EAQETALPEDDEDL	94	NLQYYDISAK	65	LIGDPNLEFVAMPALLPPEVTMDPQWQQQIEK	66
48097857	NP_724165.1	FBgn0002031	N/A	0.29573	0.589758	0.887387	0.283587	0.306496	0.396477	0.461815	0.812571	-0.0844706	0.0397457	0.214292	-0.0947779	-0.121926	-0.0636047	-0.0239248	0.134666	0.877825	NO	57	8	AAIISAEGDAQAASLIAK	62	VLPSITNEVLK	62	NIPVITGSK	42
48098081	NP_650189.1	FBgn0038037	K07424	0.991344	0.787485	0.704455	0.412479	0.137874	0.437132	0.0665759	0.716925	1.20664	0.436978	0.294396	-0.111876	-0.849942	-0.117671	-1.12856	0.270036	0.287881	NO	56	10	YMGMYDTTTPVLLIR	89	MYPVVVATDR	58	FAMLETK	31
48098249	NP_572928.1	FBgn0030529	N/A	0.116095	0.624801	0.569173	0.172694	0.162915	0.463668	0.961324	0.702545	-0.234591	0.0694447	0.0380164	-0.192304	-0.297921	-0.0276396	0.546301	0.0986932	0.543977	NO	58	4	NIPGGHNLFVQDK	38	TNFQATPPPILIDNGDAILENEK	82	EVATLVENLFSK	110
48098427	NP_649070.1	FBgn0036825	K02898	0.0972596	0.903802	0.62528	0.141047	0.828714	0.21523	0.598595	0.544618	-0.6479	0.737922	0.162268	-0.569648	0.609325	-0.564233	0.222271	0.0499948	0.564	NO	40	2	INTANVYVGIDPSK	82	LMSAPLSK	44	0	#N/A
48099074	NP_612081.1	FBgn0035189	N/A	0.1034	0.0254761	0.786862	0.111128	0.136255	0.947316	0.961202	0.552056	-0.467895	-0.810874	0.341427	-0.483256	-0.508298	0.846975	1.03442	0.0475036	0.123101	NO	24	1	QHVMPDFSATPLR	60	0	#N/A	0	#N/A
48100320	NP_649529.1	FBgn0250746	K02736	0.823196	0.84858	0.555594	0.36802	0.256216	0.427021	0.279309	0.609321	0.258144	0.310499	0.0397844	-0.0943626	-0.27464	-0.0722952	-0.235892	0.0687626	0.935442	NO	43	6	NGILIATDILGSYGSLAR	66	VMQVLYYR	40	LGTAYSDPVIATGYGAYMATPILR	39
48101574	NP_612051.1	FBgn0035154	K09646	0.149568	0.827013	0.641168	0.95716	0.865483	0.00755391	0.33268	0.916956	-1.12085	1.11888	0.348632	1.53791	1.55013	-4.09816	-0.586624	1.25008	0.109108	NO	20	3	GFGPGEQEWGYVK	88	LQEDFMKPVINIVEELLSETDLK	76	ALPGFQDVPTYITTESYGGK	51
48101907	NP_524464.1	FBgn0028684	K03065	0.723682	0.631954	0.9369	0.598433	0.280597	0.445217	0.0135874	0.840121	0.374587	0.265453	1.5461	0.210869	-0.56921	-0.13323	-2.39502	0.700454	0.414119	NO	15	6	TMLELLNQLDGFSSTADIK	54	APAIIFIDELDAIGTK	43	MNMSPDVNFEELSR	94
48101950	NP_524004.2	FBgn0010408	K02997	0.988422	0.856531	0.0907263	0.484678	0.055086	0.436375	0.564296	0.718066	0.534575	0.276316	-0.346558	-0.00918495	-0.581988	-0.0576577	0.0587502	0.125748	0.218013	NO	58	9	QVVNIPSFIVR	45	IEDFLER	25	IGVLDESR	58
48103127	NP_476874.1	FBgn0004867	K02981	0.993277	0.888508	0.565829	0.459189	0.146545	0.0311549	0.449352	0.773461	0.608254	0.325221	0.0440289	-0.0253991	-0.383468	-0.693268	-0.0465256	0.171157	0.164159	NO	58	14	EWIPVTK	38	DGKIESLEHIYLFSLPIK	27	VVGGQRPAEVV	34
48104167	NP_001097040.1	#N/A	N/A	0.230702	0.8614	0.258262	0.783329	0.936549	0.10566	0.288626	0.393924	-0.20737	0.332895	-0.188961	0.233494	0.647694	-0.512906	-0.225645	-0.0792005	0.560681	NO	25	1	LTSLTFQK	44	0	#N/A	0	#N/A
48104680	NP_523526.1	FBgn0040070	K03671	0.285795	0.683155	0.578389	0.00270898	0.731122	0.962856	0.314427	0.436855	-0.144102	0.136407	0.0556289	-0.768415	0.239928	0.708283	-0.18972	-0.0380091	0.160256	NO	57	1	VLENFSGANYDK	87	0	#N/A	0	#N/A
48104995	NP_608930.1	FBgn0000318	N/A	0.00198618	0.632504	0.490099	0.654535	0.830772	0.424298	0.860461	0.2019	-1.49501	0.164409	-0.0113078	0.176926	0.797945	-0.123029	0.831567	-0.341501	0.16795	NO	29	3	SNESIYILYTGK	75	LDLIEMLLADEDD	76	VLPTLAK	31
48105655	NP_996107.1	FBgn0053257	N/A	0.0102736	0.0659113	0.518048	0.677471	0.910499	0.596995	0.880381	0.130252	-0.66438	-0.448456	0.0133002	0.124613	0.681333	0.0989991	0.489242	-0.294651	0.228294	NO	41	1	GISHPGFSVGGPLANIAK	42	0	#N/A	0	#N/A
48105889	NP_511063.1	FBgn0014026	K02936	0.952683	0.598606	0.188752	0.586998	0.24324	0.67377	0.221685	0.586781	0.626051	0.107041	-0.36108	0.0898443	-0.379514	0.27223	-0.432526	0.0779536	0.702893	NO	49	7	VAAAPLAVK	47	QTATQLFK	60	VPPPINQFTQTLDK	31
48106363	NP_608324.1	FBgn0031035	K02947	0.868576	0.284715	0.258472	0.611315	0.148662	0.697839	0.569566	0.695112	0.230568	-0.130555	-0.148713	0.0602468	-0.33222	0.16519	0.0560747	0.0994094	0.851632	NO	58	2	GYLHLPPEIVPSTLK	57	VAIYEYLFK	57	0	#N/A
48109763	NP_732717.1	FBgn0038947	K07977	0.471683	0.666534	0.681841	0.858387	0.368821	0.704899	0.074467	0.427958	-0.0226863	0.157508	0.176803	0.379184	-0.170412	0.253632	-0.71822	-0.055809	0.82457	NO	49	3	DYFPAVDAIVFLVDASDR	80	NYFNLYGQTTGK	39	LLFLGLDNAGK	82
48126476	NP_649489.1	FBgn0037270	K03249	0.70796	0.778174	0.552999	0.49724	0.191665	0.246964	0.505998	0.778478	0.233965	0.39373	0.0627003	-0.00301013	-0.560812	-0.435592	0.0093515	0.299667	0.941663	NO	42	3	QGSMFTPVK	51	LTLLTTL	37	VIGTLLGTAEK	66
48128966	NP_648512.2	FBgn0036211	K00326	0.261625	0.161738	0.563306	0.0705959	0.776402	0.591333	0.887264	0.340566	-0.26007	-0.408303	0.0654281	-0.621631	0.432929	0.137567	0.816047	-0.161967	0.632402	NO	38	3	IGDEVVIR	39	MSQYLENLK	54	SPILLVDPVVK	90
48139441	NP_573333.2	FBgn0030968	K03331	0.104131	0.311287	0.203711	0.616493	0.806489	0.776713	0.445464	0.556148	-0.68304	-0.264995	-0.391962	0.175504	0.672182	0.537661	-0.105008	0.0596581	0.812087	NO	30	4	VGGSIVNISSQASQAALK	60	GAVDMLSK	68	AILNVSQIVAK	91
48141383	NP_511123.2	FBgn0001145	K01915	0.0865876	0.907176	0.718998	0.989925	0.473282	0.056822	0.473444	0.283795	-0.366613	0.400609	0.173589	0.663959	-0.0280298	-0.670582	-0.0281111	-0.144821	0.129861	NO	58	6	ESPNAALDK	52	YIWIDGTGESLR	68	IMDGSWNGAGAHTNFSTK	88
48141571	NP_649015.2	FBgn0036760	K01101	0.398466	0.391819	0.208005	0.484925	0.514399	0.791715	0.780837	0.26497	-0.158443	-0.173863	-0.537829	-0.0185442	0.0444427	0.566702	0.622309	-0.344775	0.955266	NO	20	3	SILSLSNVEFK	66	SAVILGKPESFVSEYITK	45	NLIIPDYYANELGDILEMIK	113
48141870	NP_476925.1	FBgn0010213	K04564	0.259384	0.226458	0.550823	0.429417	0.582593	0.594427	0.404638	0.897319	-0.285993	-0.389253	0.0634206	-0.082947	0.166872	0.158299	-0.173244	0.542846	0.889655	NO	47	3	GDVNTQVALSPAIK	107	AIFDVVNWNDVNSR	118	ALEPIISAEIMQLHHSK	57
48142173	NP_525092.1	FBgn0004066	K02731	0.503919	0.669275	0.701974	0.937457	0.476677	0.0645494	0.389135	0.564312	0.00234761	0.119642	0.137359	0.421488	-0.0198361	-0.593064	-0.10396	0.0360224	0.714619	NO	47	8	GQPLQMLDLDTIGEYVTEIEREK	73	NLEIAVMR	43	TVHEFLQK	35
48142237	NP_610503.1	FBgn0025286	K02910	0.815544	0.336752	0.141692	0.831992	0.0725064	0.617823	0.634154	0.725034	0.300217	-0.16223	-0.382345	0.330705	-0.721582	0.262823	0.180554	0.191857	0.616228	NO	34	4	EYTVNLHK	48	SAMSEVVTR	76	GLQTENVDASQD	85
48142692	NP_525108.2	FBgn0001091	K00134	0.0215543	0.157095	0.518497	0.352882	0.748369	0.77576	0.472742	0.934941	-0.54009	-0.292499	0.0134538	-0.102628	0.264379	0.301921	-0.0271128	0.382577	0.330282	NO	58	13	LTGMAFR	43	VPVHNVSVVDLTVR	80	AGAEYIVESTGVYTTK	133
48142798	NP_523531.1	FBgn0005593	K02937	0.977667	0.806099	0.666442	0.00473955	0.283165	0.616418	0.70309	0.158936	1.17253	0.568774	0.274009	-1.71718	-0.501635	0.260371	0.508454	-0.565327	0.0944079	NO	49	4	IVEPYITWGYPNLK	95	KLPAVPESVLK	60	ATINMLR	45
58531215	NP_727448.1	FBgn0003360	K05863	0.747934	0.275149	0.730193	0.0253903	0.936966	0.9238	0.0422029	0.291695	0.0872286	-0.08724	0.0895783	-0.270029	0.312009	0.292765	-0.356267	-0.0680453	0.15216	NO	58	17	YFPTQALNFAFK	73	GNLANVIR	80	DFLAGGVAAAISK	126
58585076	NP_570089.1	FBgn0029690	K01044	0.633656	0.681487	0.20107	0.955485	0.261923	0.355314	0.0864514	0.943424	0.392485	0.66159	-0.862617	1.51207	-0.835339	-0.474778	-1.68919	1.29577	0.286856	NO	27	2	IPAWIGELSATK	67	AIVETLANFMR	85	0	#N/A
58585104	NP_732076.1	FBgn0051150	N/A	0.277594	0.038658	0.303294	0.171312	0.997196	0.649701	0.153849	0.305274	-0.861235	-3.41289	-0.858754	-1.72932	9.01725	0.870674	-2.2789	-0.746819	0.124113	NO	19	5	ALLTVQAK	56	DLIVDRDVPTWEVNILK	58	ELIFQIANELEDASNIPVHATLEK	102
58585106	NP_524966.1	FBgn0011695	N/A	0.0994913	0.181301	0.89216	0.740164	0.700817	0.0876961	0.327402	0.992598	-0.462762	-0.375999	0.499792	0.245705	0.295534	-0.800144	-0.252991	0.850864	0.108228	NO	57	5	LGINV	32	LLNNYFK	41	FDNINVDEILHSDR	87
58585164	NP_609522.1	FBgn0032381	K01187	0.993817	0.811731	0.0531607	0.191691	0.77146	0.58375	0.280423	0.378774	3.00289	1.14367	-3.03927	-1.19664	1.17275	0.342705	-1.01858	-0.407517	0.179101	NO	17	3	MLNDNVFAFSR	87	FRDVLDEFPQPK	38	EDLIVYQVYPR	64
58585222	NP_651265.1	FBgn0039203	N/A	0.632379	0.891112	0.137074	0.228305	0.966088	0.536317	0.0481877	0.456598	0.305516	1.25505	-1.11145	-0.701533	2.59528	0.127949	-2.37723	-0.0935898	0.313912	NO	58	8	IGESQGSVTLR	28	FINENSELLFK	88	ILPIEPLAVDSVK	92
58585250	NP_477016.1	FBgn0000308	K05759	0.529694	0.566314	0.195007	0.793815	0.516514	0.738373	0.121551	0.747776	0.0111408	0.0280655	-0.144563	0.128177	0.00967952	0.149793	-0.277247	0.0949534	0.836765	NO	58	5	LVQGFEEQDILTSSGVTLAGNR	52	YIYLSGTDR	64	QLLASR	30
58585256	NP_608915.2	FBgn0031692	N/A	0.525574	0.167826	0.957594	0.072068	0.875537	0.0659056	0.646853	0.472078	0.0406248	-0.56644	1.33659	-1.3813	1.51281	-1.55642	0.655634	-0.0414903	0.277661	NO	15	2	AFSMFDSTK	56	LNFDSFYR	47	0	#N/A
62198227	NP_523586.1	FBgn0032601	N/A	0.760575	0.519653	0.0744174	0.995707	0.407666	0.0490855	0.703435	0.56771	0.737352	0.0576477	-1.67047	2.94753	-0.373344	-2.70751	0.841303	0.167498	0.132374	NO	56	8	GVPSSLNVISEK	53	ILIGGVSDLLENTR	86	ILNNDLNFNDINFR	104
62198229	NP_524122.2	FBgn0010424	N/A	0.694468	0.83508	0.515056	0.00975429	0.468826	0.975412	0.419536	0.0334676	0.225314	0.505746	0.0196435	-1.15573	-0.0525442	1.39221	-0.142088	-0.792547	0.101197	NO	49	4	FIVEEDAEALEK	76	SGSIPTDMVADILR	115	LMGQPFNK	44
66499293	NP_523663.1	FBgn0003074	K01810	0.107293	0.266123	0.286816	0.501246	0.584905	0.96393	0.842844	0.014347	-0.316068	-0.17579	-0.157801	0.000811632	0.0823983	0.702987	0.392055	-0.528593	0.212673	NO	56	9	QFTNEVLSK	51	DVMPDVNAVLNHMK	81	LQLTSEVAWTK	31
66499419	NP_728614.1	FBgn0035226	K08776	0.531542	0.282826	0.914896	0.817986	0.923418	0.203188	0.0482873	0.37361	0.0205062	-0.160664	0.383986	0.249216	0.585716	-0.310292	-0.688385	-0.0800838	0.417241	NO	50	11	GMNLYLK	38	TVFFNDNNGK	32	FLADGSTDTGNNSWIIPISISTSK	51
66499429	NP_648149.1	FBgn0035811	K00249	0.625383	0.0646846	0.923299	0.780188	0.147102	0.589717	0.273116	0.935373	0.132468	-0.725785	0.646424	0.358736	-0.713518	0.142703	-0.411995	0.570967	0.327176	NO	33	3	EEIIPVAAEYDK	62	MITFEDVRVPEENVLGK	42	AFTAFIVER	64
66499585	NP_572346.1	FBgn0029897	K02880	0.753313	0.0286578	0.779393	0.815699	0.101808	0.11556	0.943512	0.885156	0.314382	-0.890747	0.360841	0.37849	-0.932837	-0.873777	1.10363	0.540016	0.164419	NO	27	1	SAEFLLQLLK	98	0	#N/A	0	#N/A
66499627	NP_524742.1	FBgn0011787	N/A	0.785605	0.15936	0.422106	0.777544	0.400568	0.307963	0.588556	0.739483	0.645878	-0.851225	-0.168096	0.648894	-0.467754	-0.409538	0.207634	0.394207	0.887295	NO	15	1	VGGIVEIV	33	0	#N/A	0	#N/A
66500170	NP_652145.1	FBgn0027588	K01187	0.97961	0.795072	0.982164	0.403151	0.542733	0.52841	0.0201819	0.553501	0.662999	0.368835	0.958108	-0.0829818	0.0725636	0.0386869	-2.06284	0.0446299	0.234109	NO	15	3	LILIEK	39	EYYINQYSLDK	67	YNPNNNVLTIR	70
66500174	NP_524557.1	FBgn0016685	K11278	0.800428	0.3281	0.4242	0.404299	0.678936	0.53808	0.0203558	0.993508	0.39323	-0.22941	-0.0987287	-0.116961	0.327139	0.0677513	-1.48007	1.13705	0.157162	NO	58	2	MALLGPEAKPGELNVLQVEAMGLK	94	TPIALLEMGK	71	0	#N/A
66500205	NP_650401.1	FBgn0038271	K01412	0.296936	0.399012	0.701143	0.0525116	0.0608997	0.993712	0.764027	0.187309	-0.141793	-0.0737608	0.144574	-0.467821	-0.563066	1.01158	0.316463	-0.226178	0.135889	NO	45	3	AVEILSDIIQNSK	49	EQTVFYAK	54	NDLLNYVK	53
66500946	NP_572916.1	FBgn0030518	K08964	0.982515	0.133524	0.472399	0.174048	0.548181	0.482575	0.362807	0.760073	0.637653	-0.360144	-0.0209188	-0.319557	0.0575127	-0.0197011	-0.160181	0.185336	0.41244	NO	40	2	LSGLDPAAVPK	57	IYIAPSGVQK	51	0	#N/A
66501172	NP_477090.1	FBgn0014009	K07877	0.735923	0.965801	0.42062	0.619843	0.379208	0.0597687	0.597866	0.837099	0.297275	0.961882	-0.101577	0.158696	-0.310766	-1.54008	0.153939	0.380632	0.490429	NO	18	3	MITIDGKPIK	29	ETFNHLTTWLEDAR	57	YIIIGDTGVGK	78
66501507	NP_523741.2	FBgn0001220	K04043	0.674628	0.876648	0.902555	0.918051	0.0698669	0.154899	0.266418	0.598626	0.0566887	0.164137	0.183278	0.183342	-0.292936	-0.200454	-0.123704	0.0296492	0.400144	NO	58	20	TTPSYVAFSK	53	SDIGEVLLVGGMTR	109	STNGDTFLGGEDFDNALVNHLVSEFKK	85
66503776	NP_649812.2	FBgn0037607	K00615	0.0922449	0.167555	0.185237	0.204247	0.824957	0.910677	0.813414	0.276308	-0.220049	-0.176067	-0.164005	-0.141575	0.232725	0.339216	0.223128	-0.0933728	0.515515	NO	58	24	IHSINATLASK	49	LGQSEPTSLQHNMEVYRK	34	NPGPLGLHPQK	35
66503873	NP_651048.1	FBgn0028688	K03037	0.314107	0.15332	0.717566	0.64946	0.639536	0.691748	0.509482	0.224899	-0.384183	-0.866701	0.489096	0.273141	0.383588	0.639421	0.0351918	-0.569553	0.937879	NO	23	2	ELDDAIEDAEK	45	DLNWPVDDTLLTSMK	96	0	#N/A
66503969	NP_647865.2	FBgn0028736	N/A	0.857044	0.879269	0.670782	0.895575	0.00443197	0.904162	0.49396	0.978869	0.608171	0.707501	0.29491	0.616561	-4.19137	0.937493	-0.0094325	1.03616	0.243007	NO	19	2	LAINDILNIIK	90	VQSLLVK	33	0	#N/A
66504141	NP_610807.2	FBgn0033763	K01135	0.297763	0.763503	0.0139052	0.664653	0.267903	0.876556	0.301658	0.964332	-0.160122	0.239909	-0.754166	0.133144	-0.282327	0.534739	-0.238384	0.527207	0.189809	NO	58	13	SALMTGK	46	NLGYSTHMVGK	74	NTLWEGGVR	51
66504249	NP_609844.1	FBgn0032643	K08288	0.801129	0.810851	0.910932	0.923123	0.00136532	0.373585	0.46548	0.684154	0.248983	0.292697	0.457448	0.443287	-1.38891	-0.143837	-0.0414242	0.131761	0.0969452	NO	50	3	EINLQEFMDTAWANIK	63	LVSVTEPSR	58	SVNDLLLEIR	96
66504263	NP_573087.1	FBgn0030703	N/A	0.134884	0.564725	0.715631	0.306701	0.706546	0.651931	0.191348	0.540398	-1.45534	0.193401	0.640017	-0.488561	1.44598	0.748124	-1.17329	0.0896634	0.919485	NO	14	3	TGEMESIREWEEQFK	31	FSLETSQEYDDLSDLK	137	DFTLEELK	47
66504343	NP_476632.1	FBgn0002622	K02985	0.829779	0.979564	0.135339	0.831394	0.0191411	0.336069	0.816899	0.270598	0.182943	0.455632	-0.236857	0.195138	-0.626035	-0.130257	0.270551	-0.111116	0.116047	NO	57	11	FIMESGAK	40	IMLPYDPHGK	53	AELNEFLTR	68
66504360	NP_524358.2	FBgn0016691	K02137	0.332849	0.100576	0.812999	0.152877	0.993865	0.82443	0.138345	0.0293684	-0.0683093	-0.228719	0.157958	-0.169469	0.63808	0.231557	-0.272511	-0.288587	0.089276	NO	58	7	GQSIMLTAK	82	SETINLLALLAENGR	139	YSDIIAETL	38
66504768	NP_610270.1	FBgn0033162	K01759	0.239939	0.549908	0.0494304	0.501228	0.787188	0.905503	0.292504	0.510025	-0.148677	0.0292154	-0.390808	0.000671184	0.254676	0.42544	-0.175549	0.00503189	0.639698	NO	58	7	SLPFYTEVLGMQLLQK	44	LNVEFIK	53	DPDGYWIEILNPVNIANIVPIQ	53
66504786	NP_649517.1	FBgn0037298	N/A	0.396154	0.0260981	0.262076	0.899988	0.951855	0.506717	0.465101	0.297325	-0.141819	-1.15581	-0.369124	0.725644	1.30161	0.0135851	-0.0816973	-0.292393	0.371726	NO	34	6	LPELWPK	29	TSLIEELIKK	63	EFASNIDDVPIFIADLK	66
66505007	NP_648687.1	FBgn0026418	K09485	0.486129	0.712723	0.347617	0.995029	0.00614188	0.404078	0.545683	0.88307	-0.00764284	0.134711	-0.0937843	0.583578	-0.830573	-0.0876393	0.0407545	0.260596	0.0764147	NO	47	10	LSEEDQLSTFVTEIDK	60	VRDFSVTDIQPYPLK	29	QALLDAAR	50
66505914	NP_477101.1	FBgn0014028	K00235	0.932599	0.03023	0.914594	0.343861	0.588565	0.715861	0.48845	0.0420362	0.609755	-0.867681	0.61555	-0.171715	0.137671	0.365085	-0.017953	-0.670712	0.153248	NO	56	3	SFAVYR	27	DLVPDLNNFYNQYK	95	IKNEIDPTLTFR	58
66506619	NP_726176.1	FBgn0034709	N/A	0.222612	0.189149	0.188785	0.0625447	0.844083	0.91809	0.935912	0.0422267	-0.17631	-0.23195	-0.225243	-0.377229	0.352685	0.502979	0.537191	-0.382123	0.193661	NO	56	4	VYDPESLPR	27	IIGWGEDISTDSGLPIK	107	LGTLNPSNSVYR	97
66506677	NP_723277.3	FBgn0025697	N/A	0.815571	0.172066	0.52506	0.673385	0.169349	0.156216	0.628853	0.982084	0.884195	-0.94712	0.058945	0.489807	-1.26785	-1.61989	0.6098	1.79212	0.322654	NO	16	1	LWEVTPIPMYLK	50	0	#N/A	0	#N/A
66506786	NP_609394.1	FBgn0032237	K00026	0.00182288	0.105037	0.406409	0.746833	0.919951	0.782097	0.622321	0.560938	-0.518376	-0.240692	-0.0451778	0.11827	0.37225	0.206306	0.082491	0.0249292	0.121016	NO	58	8	LLDIPVMMK	61	IVQGLSINDFAR	98	DIVFSFPVTIENGQYK	106
66506837	NP_652014.1	FBgn0029134	K02737	0.309829	0.113586	0.985737	0.254888	0.661375	0.228037	0.450407	0.923712	-0.294288	-1.01691	1.29303	-0.446428	0.493187	-0.607578	-0.0899536	0.668934	0.179962	NO	17	4	ISIAAASK	33	DAYSGGIVR	33	LLSNMIYNYK	70
66506923	NP_611693.1	FBgn0034751	K02974	0.809092	0.549331	0.601234	0.262045	0.218402	0.880836	0.341519	0.287967	0.439757	0.0694939	0.137206	-0.328207	-0.649205	0.947197	-0.348889	-0.267351	0.844049	NO	42	1	STGFALIYDTLDFAK	142	0	#N/A	0	#N/A
66507623	NP_523849.3	FBgn0016687	K01507	0.891832	0.0194827	0.0324325	0.732163	0.865928	0.315814	0.891995	0.578174	0.464535	-1.09828	-0.817829	0.256925	0.666883	-0.306863	0.759164	0.0754678	0.162651	NO	36	3	ILNMVVEIPR	56	ATIEWFK	53	ETLNPIK	29
66507689	NP_523604.2	FBgn0000464	N/A	0.855812	0.272243	0.951794	0.176621	0.275536	0.576614	0.360094	0.606117	0.459841	-0.330838	0.665252	-0.381846	-0.338632	0.120655	-0.290893	0.0964602	0.551325	NO	24	1	ILLPNQNNLNNK	36	0	#N/A	0	#N/A
66508193	NP_477254.1	FBgn0020385	K00288	0.0591898	0.36787	0.0623539	0.524816	0.99498	0.407525	0.87013	0.0621788	-1.14378	-0.359286	-1.39096	0.07297	2.99393	-0.270179	1.23222	-1.13492	0.0881169	NO	14	5	INSNMITDLVLPEK	80	ISLNVLK	29	LDIDPENITWTR	54
66508517	NP_611539.1	FBgn0034577	K10364	0.402021	0.251436	0.528489	0.324072	0.664503	0.737132	0.82199	0.0238693	-0.103649	-0.301033	0.0294604	-0.228062	0.278813	0.358365	0.648402	-0.682295	0.588408	NO	31	4	VLLNNDNLLK	71	IVSYSIGK	35	SALQDEITTYTQSHYR	64
66508573	NP_001027402.1	FBgn0061356	K11517	0.0466127	0.00387769	0.423148	0.364922	0.911801	0.82102	0.81945	0.751179	-0.595275	-1.08892	-0.0793224	-0.120127	0.68603	0.464026	0.526607	0.206977	0.0940122	NO	39	5	LPIILK	34	DLSTTILGEK	79	QGIDVFK	37
66508940	NP_611243.1	FBgn0034259	N/A	0.234232	0.870092	0.846046	0.582931	0.772604	0.236739	0.337704	0.0922472	-0.245556	0.437138	0.385732	0.0714912	0.397839	-0.379252	-0.235129	-0.432264	0.634161	NO	48	4	TIPTELDGFK	50	VSLDGADVNLEK	101	GISNEFAEK	53
66508961	NP_649943.2	FBgn0037749	K05901	0.151746	0.531394	0.154292	0.0678133	0.903781	0.594873	0.496536	0.9547	-0.419805	0.0377135	-0.42934	-0.677439	0.754954	0.150178	-0.00624529	0.589984	0.318094	NO	25	2	MFDLLK	44	NDLSPTTILSTGMK	67	0	#N/A
66509032	NP_524469.2	FBgn0015282	K03062	0.471204	0.0511666	0.778741	0.810715	0.503556	0.324039	0.240198	0.987148	-0.0195074	-0.517511	0.228441	0.250987	0.00389798	-0.203055	-0.296715	0.553462	0.217957	NO	33	6	GVILYGPPGTGK	96	VVGSELIQK	26	TMLELLNQLDGFDSR	126
66509573	NP_524551.2	FBgn0019972	K04397	0.11039	0.799873	0.357615	0.992146	0.253752	0.312529	0.399454	0.745507	-0.43327	0.324361	-0.140685	0.809364	-0.373194	-0.272786	-0.12725	0.21346	0.255439	NO	38	4	AINETFSTLGFEVK	71	QMPTFTSTLTR	64	DSPIYSMTQK	44
66509714	NP_572686.1	FBgn0028686	K03063	0.311811	0.940958	0.359105	0.625013	0.0327632	0.946726	0.244421	0.592182	-0.232072	1.00901	-0.27883	0.152698	-1.24103	1.16603	-0.680689	0.104884	0.339201	NO	14	4	ENSPAIIFVDEIDAIATK	69	EAVELPLTHFELYK	78	ILLELLNQMDGFDQTTNVK	62
66509780	NP_477091.1	FBgn0000046	K05692	0.481133	0.441096	0.813894	0.0301212	0.741693	0.847227	0.681712	0.0155428	-0.00959083	-0.0334299	0.202514	-0.403042	0.20122	0.321114	0.147628	-0.426413	0.221839	NO	58	19	GYSFTTTAER	83	TTGIVLDSGDGVSHTVPIYEGYALPHAILR	54	IIAPPER	46
66509916	NP_608743.2	FBgn0031497	K01875	0.164106	0.956998	0.119522	0.228259	0.630797	0.903984	0.604951	0.0806444	-1.38827	2.68102	-1.90536	-1.03181	0.848504	2.24213	0.499043	-1.94526	0.262994	NO	17	3	DVMQEVAQLSQFDEELYK	94	NEWIPENILPIK	41	SLTVAQIK	43
66510064	NP_524332.2	FBgn0016693	K12483	0.0357741	0.0835383	0.417997	0.60448	0.308232	0.869619	0.909948	0.59978	-0.554649	-0.490371	-0.0661039	0.0838664	-0.216676	0.523944	0.650985	0.0690043	0.433488	NO	50	14	YLLER	28	LEGYDLPAELPDHLIPPSK	69	DMPSVFGK	38
66510285	NP_608827.1	FBgn0027560	K00697	0.0211967	0.291342	0.449569	0.0816843	0.954063	0.607999	0.927823	0.163201	-0.787191	-0.229684	-0.0527491	-0.527248	0.955789	0.150888	0.834649	-0.344453	0.198357	NO	48	15	DAAVALVTPLR	73	TAFGLDWSER	59	AYSAVNEEFAAK	96
66510448	NP_648918.1	FBgn0036659	K01229	0.410985	0.0454783	0.476093	0.988954	0.832893	0.0231686	0.765828	0.698779	-0.311739	-3.08272	-0.0909036	3.38632	2.71575	-4.70113	1.52777	0.55665	0.183893	NO	18	3	SLEQGFMK	33	ILPTGFVNK	32	VVFYEFGSK	47
66510482	NP_523982.2	FBgn0003149	N/A	0.656515	0.64201	0.898322	0.203901	0.532398	0.731753	0.311919	0.0403593	0.0921488	0.0932216	0.328824	-0.197117	0.0281362	0.215931	-0.171193	-0.389953	0.569922	NO	57	17	LEVHVAELNVK	60	INVELK	43	IQEQEEQIETLLVK	105
66510928	NP_536731.1	FBgn0000261	K03781	0.50782	0.0404628	0.0365636	0.274725	0.988576	0.521511	0.913021	0.157688	0.00900387	-0.911078	-0.910045	-0.278101	1.62709	0.034751	0.864027	-0.435644	0.12706	NO	32	4	DPIYFPSFIHTQK	66	GAGAFGYFEVTHDITK	92	FYTEEGVWDLVGNNTPIFFIK	67
66511001	NP_726885.1	FBgn0029676	K09560	0.0312649	0.356711	0.325259	0.949646	0.94898	0.179528	0.871958	0.0331817	-0.449965	-0.0965081	-0.117762	0.412097	0.589855	-0.330065	0.410031	-0.417682	0.102465	NO	56	3	EISTNPTNILK	71	ANYLLGK	25	FLNDPDVLQAFMDPEVAEAFK	100
66511275	NP_733418.1	FBgn0051004	N/A	0.9944	0.411329	0.329752	0.819438	0.365423	0.283116	0.226239	0.405157	0.423381	-0.0405338	-0.0797123	0.154183	-0.0860663	-0.144295	-0.190083	-0.0368735	0.332359	NO	58	14	YFIETPATAAEK	84	FAISVGDSK	64	SNFFFVPGTK	72
66511652	NP_609948.1	FBgn0086443	K01893	0.773582	0.43425	0.53701	0.355948	0.780689	0.577732	0.118733	0.524214	0.50705	-0.140022	0.0677941	-0.239979	0.818048	0.168757	-1.21921	0.037559	0.930035	NO	22	2	SVLTQAFR	35	VLNSNLGYLIK	71	0	#N/A
66512039	NP_524715.2	FBgn0015808	K08764	0.044855	0.655819	0.56785	0.95304	0.580056	0.381654	0.171233	0.860041	-0.460602	0.122504	0.0504796	0.475387	0.0817555	-0.12725	-0.408015	0.26574	0.334843	NO	55	8	MGFPQQFEK	50	KIELLR	27	IQGNMGMAMK	43
66512107	NP_524115.1	FBgn0002284	K02732	0.851213	0.599508	0.93612	0.508053	0.677613	0.0302476	0.284311	0.715688	0.18127	0.0528695	0.272823	0.00373629	0.124413	-0.578896	-0.146538	0.0903229	0.526727	NO	43	6	IITSDGIQNFNFALR	133	DIYTGDSIFIK	36	DVFTSAAERDIYTGDSIFIK	52
66512410	NP_651674.3	FBgn0039640	K11140	0.831958	0.660557	0.742803	0.666954	0.283704	0.00450531	0.507975	0.992149	0.436587	0.205638	0.324876	0.20256	-0.397565	-1.84742	0.0136463	1.06168	0.10236	NO	57	18	NLFQNWIVEPGK	94	IFINVVEPTNTVVVHNDGLR	83	YLLNPEESLIIVSR	92
66512568	NP_647985.1	FBgn0035632	K00859	0.705316	0.570558	0.233267	0.069145	0.112924	0.780848	0.603109	0.968615	0.135086	0.0513903	-0.191325	-0.393895	-0.475675	0.317298	0.10856	0.448561	0.402855	NO	48	1	MFNLEEFLK	73	0	#N/A	0	#N/A
66512737	NP_525082.2	FBgn0011661	N/A	0.580061	0.441614	0.525904	0.823003	0.0194904	0.721526	0.837187	0.505785	0.0863709	-0.0714956	0.0321465	0.402189	-1.46525	0.375254	0.635008	0.00577753	0.586427	NO	53	9	ELTAMMEK	59	GMLREDAMMEYLK	61	IQSEVVAK	33
66512887	NP_649294.1	FBgn0037063	K01092	0.298719	0.0139366	0.421393	0.879826	0.968234	0.434826	0.561933	0.197414	-0.267252	-1.29437	-0.111001	0.648854	1.43483	-0.125391	0.123984	-0.409657	0.265462	NO	49	4	ILVQYYPERD	44	LVLEAGSIVR	39	FIGEEASSLGSK	87
66513180	NP_610629.1	FBgn0033570	K03950	0.456919	0.378034	0.423018	0.0184729	0.720721	0.759111	0.850461	0.26541	-0.0629032	-0.223441	-0.122687	-1.32497	0.506788	0.609231	0.954966	-0.336982	0.500772	NO	34	2	VIDLLLIK	75	QIPFILSNYDLPR	49	0	#N/A
66513205	NP_573066.1	FBgn0027329	K09498	0.194352	0.25608	0.902519	0.646019	0.483407	0.411307	0.347921	0.797304	-0.281581	-0.241714	0.461651	0.132592	-0.0199883	-0.113499	-0.201358	0.263898	0.808341	NO	50	7	GIDPPSLDMLAR	101	ASTAQDDVTGDGTTSTVLIIAELLK	71	AAQALAVNISAAK	100
66513260	NP_477003.1	FBgn0011361	K03955	0.990284	0.504498	0.536544	0.0102099	0.759022	0.731658	0.507611	0.0509112	1.11019	0.00523183	0.044798	-1.32749	0.391785	0.50319	0.0158767	-0.743588	0.0617981	NO	26	1	APLSLDLIR	68	0	#N/A	0	#N/A
66513469	NP_728595.1	FBgn0010246	K10356	0.982106	0.375106	0.226563	0.143988	0.0493948	0.978587	0.617135	0.167874	0.458248	-0.0756268	-0.178917	-0.239254	-0.54489	0.678491	0.100629	-0.198681	0.0910624	NO	57	20	EFLFK	28	VGVQDFVLLEDFESEVAFIDNLQK	59	QAAIVFQK	52
66513527	NP_476735.1	FBgn0003462	K04565	0.140125	0.17664	0.0496613	0.710705	0.91706	0.614122	0.411809	0.884758	-0.214997	-0.206777	-0.370258	0.114647	0.429792	0.089483	-0.0691092	0.227218	0.354823	NO	58	8	TIQLQGPHSVIGR	64	VTGQVTGLK	77	VTGQVTGLKK	31
66513595	NP_729248.1	FBgn0035772	K00518	0.49722	0.272416	0.211624	0.873137	0.373648	0.84555	0.317094	0.556446	-0.00308966	-0.270963	-0.363562	0.477955	-0.164248	0.615717	-0.344054	0.0522436	0.842149	NO	24	2	IYISGISGNK	62	VLMILDSK	45	0	#N/A
66513627	NP_477170.1	FBgn0015790	K07904	0.487672	0.76482	0.404059	0.37716	0.74718	0.840413	0.214317	0.198232	-0.00974282	0.246738	-0.0835617	-0.0915043	0.257287	0.496807	-0.546426	-0.269597	0.85473	NO	25	3	GAVGALLVYDIAK	27	VVLIGDSGVGK	66	AITSAYYR	31
66513629	NP_649732.1	FBgn0037513	K01431	0.331796	0.838298	0.179668	0.401675	0.371576	0.710665	0.0606545	0.996651	-0.218371	0.592047	-0.535473	-0.138151	-0.259545	0.443087	-1.23898	1.35539	0.137307	NO	48	3	LDLYAK	41	VGLIQHSIVLPTTEPLQK	75	ELNEYVEK	46
66513649	NP_476739.1	FBgn0250789	K06114	0.946113	0.263993	0.808102	0.00719883	0.341124	0.917281	0.316276	0.470877	0.173499	-0.0749115	0.103789	-0.279188	-0.0666187	0.229299	-0.0784563	-0.00741337	0.135953	NO	58	51	QETFDAGLHAFEHEGIQNITSLK	51	DLIGVQNLQK	65	NKLEQLGALAAR	49
66514094	NP_610107.1	FBgn0032945	K00289	0.0623818	0.0100024	0.55297	0.248885	0.926322	0.706299	0.923495	0.319343	-0.437858	-0.750922	0.0415417	-0.195202	0.616861	0.237066	0.612367	-0.123854	0.168419	NO	56	14	AMAEAVNLVAK	84	TDVAAPFGGFK	51	IDNTPVFK	27
66514137	NP_650680.1	FBgn0038571	N/A	0.161122	0.522837	0.353299	0.743848	0.721682	0.0783325	0.558087	0.868285	-0.545355	0.0454579	-0.218025	0.384165	0.588037	-1.06871	0.252456	0.561974	0.541577	NO	21	3	LATALLQDQENIA	49	LNLLVIK	40	LLLTGK	38
66514422	NP_524353.2	FBgn0038257	N/A	0.0439879	0.906039	0.213385	0.673359	0.254559	0.711327	0.164318	0.990436	-0.528256	0.464581	-0.266889	0.145143	-0.309008	0.260948	-0.462422	0.695903	0.110902	NO	51	1	IVFDFLK	57	0	#N/A	0	#N/A
66514513	NP_723607.1	FBgn0051871	K01046	0.648153	0.337305	0.626915	0.408655	0.232587	0.600575	0.803021	0.611069	0.546389	-0.831128	0.503939	-0.461207	-3.18179	0.649502	2.40588	0.368415	0.97051	NO	15	2	TNSPFFQIIAPFSNDIK	93	LIQMLGK	38	0	#N/A
66514673	NP_477122.1	FBgn0014863	N/A	0.416153	0.243397	0.885207	0.0173988	0.959121	0.645605	0.26177	0.35448	-0.0661763	-0.25024	0.434967	-0.729488	0.843348	0.204017	-0.319808	-0.11662	0.236996	NO	48	3	SVYAAEER	51	GVGFGMGAGTLTMA	72	TTVIDTAIIK	66
66514697	NP_476643.1	FBgn0002789	N/A	0.727146	0.196553	0.29164	0.749125	0.495826	0.964062	0.131155	0.144145	0.27897	-0.438698	-0.281026	0.328823	-0.00709571	1.42966	-0.831253	-0.479384	0.475859	NO	51	5	DIAQVVTTLFALGR	74	KFPPGELFEDVIK	61	MMENINAFQK	73
66516926	NP_524726.1	FBgn0024939	K02938	0.983254	0.806812	0.408145	0.317158	0.0738394	0.645764	0.13088	0.861172	0.76757	0.348645	-0.0910986	-0.184495	-0.785334	0.208247	-0.626618	0.363084	0.289191	NO	51	4	IGLIAAR	45	IDKPILK	25	AMVGIVAGGGR	68
66517155	NP_724885.1	FBgn0004907	K06630	0.607109	0.969193	0.766969	0.631341	0.301667	0.0183466	0.530465	0.678339	0.0336026	0.263276	0.101082	0.0431721	-0.0996388	-0.410723	0.0147698	0.0544592	0.358258	NO	58	9	YLAEVATGETR	94	VISSIEQK	69	VFYLK	35
66517287	NP_788518.1	FBgn0010352	K00164	0.777779	0.864733	0.883507	0.297678	0.778603	0.0403556	0.425515	0.179018	0.157453	0.251965	0.272225	-0.109994	0.239419	-0.575688	-0.058973	-0.176408	0.46111	NO	56	10	LAVVANPSHLEAVDPVVQGK	87	NTPPVLDK	31	TVDWALGEAMAFGSLLK	47
66517317	NP_572610.1	FBgn0028342	K02134	0.0825947	0.0530129	0.611802	0.36856	0.0993016	0.98725	0.871722	0.461821	-0.341757	-0.452935	0.0755121	-0.0858801	-0.47829	0.88035	0.425131	-0.0221302	0.170021	NO	55	3	AAATIAIEVSEALVQAVQ	88	QVDVPSFSGSFGILPK	112	FTFAGANQVFYDESVIK	171
66517407	NP_729871.1	FBgn0011284	K02987	0.977673	0.312944	0.136795	0.284115	0.0220809	0.825579	0.831353	0.712404	0.567806	-0.151251	-0.341331	-0.164788	-0.879468	0.404769	0.416365	0.147899	0.179078	NO	58	7	GIPFLVTHDGR	54	LIYDVK	37	YALTNSEVTK	66
66517577	NP_995934.1	FBgn0019643	K00669	0.0883524	0.86827	0.501789	0.124	0.776699	0.533805	0.815877	0.242628	-0.928145	0.573475	0.00254566	-0.557078	0.559465	0.0681412	0.657404	-0.375807	0.452773	NO	24	1	GLNILEIR	69	0	#N/A	0	#N/A
66517659	NP_608420.1	FBgn0031143	K01774	0.819477	0.601562	0.386687	0.244839	0.69407	0.304973	0.436501	0.537986	0.169798	0.0528316	-0.0592865	-0.133161	0.142474	-0.144356	-0.0451461	0.0168464	0.964425	NO	58	12	IAFSIPYAEQPEIQK	53	NILELK	38	QLSIPDYASEAVLNR	84
66518140	NP_610715.1	FBgn0033669	K06700	0.530037	0.586116	0.890159	0.069573	0.0793822	0.790609	0.776734	0.304394	0.0548339	0.147875	0.807413	-0.857647	-1.46652	0.885685	0.690993	-0.262635	0.413586	NO	18	1	SDEDLLVNLLK	97	0	#N/A	0	#N/A
66518230	NP_524105.2	FBgn0011693	K00069	0.0030211	0.39584	0.388831	0.581855	0.904793	0.403323	0.834524	0.538582	-1.33579	-0.137716	-0.145425	0.102283	0.938645	-0.185782	0.721876	0.0419105	0.214484	NO	47	6	QPYAVEFPPLK	70	VVNDLNGLDIVINNAGIYNDK	89	DIPQTPEHVGNAMVK	50
66518853	NP_524752.1	FBgn0024556	K02358	0.0418781	0.121201	0.484036	0.49092	0.0454502	0.98548	0.946853	0.370035	-0.324052	-0.243184	-0.00826554	-0.00443812	-0.489813	0.641403	0.487302	-0.058953	0.111399	NO	57	6	TTLTAAITK	71	LEILEGK	51	VDVADEEMVDLVEMELR	91
66518971	NP_524918.1	FBgn0000258	K03097	0.905722	0.822423	0.703922	0.114761	0.35553	0.599434	0.343148	0.189438	0.679644	0.498541	0.276524	-0.62085	-0.269541	0.192662	-0.323091	-0.433889	0.685099	NO	27	2	YYLYELLK	49	VLGTEELFEYLEK	117	0	#N/A
66519157	NP_609804.1	FBgn0032596	K02734	0.65669	0.168071	0.361457	0.887205	0.53735	0.255098	0.928485	0.281087	0.195837	-0.484346	-0.196482	0.746321	0.0604026	-1.18053	1.12874	-0.269935	0.631611	NO	30	5	NLADYLR	29	NIQLYK	25	ELEPITAK	36
66519390	NP_649158.1	FBgn0028695	K03028	0.913322	0.757426	0.719497	0.0756033	0.317519	0.818556	0.101079	0.650455	0.734478	0.348332	0.28684	-0.859499	-0.403483	0.698684	-0.959833	0.154482	0.50912	NO	25	7	IAQGLTHLGK	42	YLYSSEDYIK	40	LLQEELTNLVER	92
66519842	NP_524076.2	FBgn0023174	K02739	0.311697	0.0882546	0.219972	0.750266	0.838413	0.639717	0.674282	0.45585	-0.23786	-0.948014	-0.409142	0.369237	0.752313	0.227082	0.288864	-0.0424793	0.804122	NO	25	4	QLLFR	26	GSVDYLRPYDVANVK	62	ELVADAIR	50
66519891	NP_608961.1	FBgn0031741	K01278	0.355907	0.361627	0.117724	0.968555	0.0179732	0.899642	0.362419	0.971267	-0.122921	-0.128861	-0.454616	0.637474	-1.06299	0.705444	-0.169613	0.596079	0.0888687	NO	50	8	LIDLPPPVDVVGADNVLYTANWR	91	AGTTNPFVSLSVIDLHDPSSK	88	YVIVAK	31
66520165	NP_608447.1	FBgn0020369	K03066	0.473284	0.900031	0.401856	0.997819	0.21827	0.167989	0.0686821	0.809594	-0.0216733	0.471583	-0.0826605	1.04031	-0.379149	-0.461193	-0.840017	0.272798	0.0673065	NO	35	7	IDILDPALLRPGR	27	EVIELPVK	56	ELFVMAR	30
66520256	NP_651727.1	FBgn0039697	K03521	0.0113963	0.0991661	0.518102	0.418361	0.915802	0.977105	0.409804	0.128797	-0.479497	-0.299067	0.00975867	-0.0436511	0.409081	0.686156	-0.0703532	-0.212426	0.136443	NO	51	8	EVDGGLEVVK	39	MPTVLSADLR	58	ADLIIVGK	57
66521433	NP_726381.1	FBgn0004551	K01537	0.980159	0.850043	0.433148	0.0240787	0.675018	0.39472	0.459581	0.130462	0.702538	0.408298	-0.0610383	-0.718926	0.240169	-0.147736	-0.0564286	-0.366875	0.178588	NO	48	5	VIVITGDNK	73	IFSTTLR	27	FSIPVVLLDETLK	93
66521459	NP_476813.1	FBgn0004363	K05862	0.360703	0.368557	0.688546	0.205932	0.908023	0.943018	0.112167	0.0472864	-0.0443966	-0.0467675	0.0685362	-0.106626	0.25809	0.309555	-0.237792	-0.200599	0.341708	NO	58	7	YNLDNDASIR	85	IGLALDLQA	43	VFGSLETK	52
66522084	NP_651703.1	FBgn0039674	N/A	0.965336	0.187636	0.339951	0.0252674	0.970793	0.207084	0.334697	0.655517	1.21803	-0.859693	-0.251233	-1.41039	2.26192	-0.759915	-0.385982	0.18726	0.132601	NO	14	1	EEGFLALWR	71	0	#N/A	0	#N/A
66522335	NP_523845.2	FBgn0002787	K03038	0.779669	0.855373	0.469564	0.938899	0.173456	0.698128	0.0497622	0.926751	0.426277	0.596253	-0.0393619	1.07284	-0.689063	0.346406	-2.41592	0.702571	0.432753	NO	18	1	ITNQLLGLK	56	0	#N/A	0	#N/A
66522349	NP_523707.1	FBgn0010621	K09497	0.99273	0.893451	0.220587	0.767944	0.681468	0.232048	0.224759	0.0117369	0.526456	0.302607	-0.171182	0.169291	0.144043	-0.253184	-0.273567	-0.444464	0.0571188	NO	46	7	DVNFELIK	60	DVANILK	49	AQNVIETLTSK	79
66522386	NP_732012.1	#N/A	K10374	0.0794645	0.762333	0.809596	0.0125795	0.680885	0.934574	0.581051	0.0757926	-0.326053	0.18155	0.23167	-0.560146	0.172083	0.539298	0.0726819	-0.311085	0.144093	NO	56	12	EVDRLEDELGINK	58	SLEVSEEK	65	IMELEEELK	80
66523029	NP_649090.1	FBgn0036848	N/A	0.0411222	0.324035	0.182863	0.191246	0.669632	0.870785	0.944385	0.605655	-0.922465	-0.330467	-0.631122	-0.591839	0.291573	0.848123	1.19635	0.139841	0.309198	NO	15	3	GMLTTDILEQIQPVFAR	41	NVIVLHK	45	AFSPEPIVHPVLDQYDAIK	36
66523390	NP_996274.1	FBgn0001098	K00261	0.044395	0.310897	0.764656	0.131877	0.746436	0.978274	0.673898	0.00795301	-0.362375	-0.118754	0.181576	-0.260497	0.237112	0.677542	0.155324	-0.509928	0.076613	NO	54	13	IFTTYSEAGLAF	44	DIVHSGLDYTMER	60	GFIGPGVDVPAPDMGTGER	118
66523706	NP_611218.1	FBgn0050104	K01081	0.90319	0.646487	0.33355	0.900292	0.129862	0.457309	0.397531	0.449488	0.916014	0.287367	-0.299918	0.83916	-1.22796	-0.100607	-0.323419	-0.0906321	0.686787	NO	26	3	TDNVIFLDEVQSIR	28	NLQTQPLGITTSDILIEYLK	88	VTMGDILSVLPFQNTIVK	33
66524051	NP_476637.1	FBgn0000109	K00759	0.188381	0.0701738	0.181474	0.330268	0.0857357	0.914687	0.997803	0.309157	-0.355069	-0.640192	-0.41792	-0.182205	-0.898505	0.977202	1.69849	-0.181803	0.0919977	NO	32	2	LNVPVHSFIQYDS	57	DIFGIFR	48	0	#N/A
66524108	NP_523938.2	FBgn0035631	N/A	0.100849	0.554771	0.591218	0.12003	0.968854	0.303244	0.204455	0.681581	-0.47619	0.0582137	0.0907045	-0.433922	1.26623	-0.248835	-0.402811	0.146608	0.462315	NO	37	1	IAPIFEQLSLK	78	0	#N/A	0	#N/A
66524124	NP_648118.1	FBgn0035779	K01291	0.704027	0.532875	0.134481	0.762222	0.0284086	0.240018	0.78428	0.99638	0.251761	0.0427604	-0.578351	0.348433	-1.36992	-0.503878	0.5606	1.24859	0.109722	NO	58	10	DFILAR	38	TYGNVASLITIGNSYEGR	153	AVGTETFEAIK	113
66524128	NP_650918.1	FBgn0027493	K01939	0.0358398	0.408237	0.935817	0.811916	0.0769828	NA	0.898548	0.0642951	-1.59385	-0.205149	1.18329	0.839349	-1.59201	NA	2.73474	-1.36637	0.13572	NO	14	5	LDILDTLPK	74	IGDLLGDFDK	61	IQVGVGYR	25
66524882	NP_609588.1	FBgn0032453	N/A	0.0633496	0.0585187	0.715998	0.11683	0.85857	0.610249	0.646069	0.905624	-0.253944	-0.290089	0.104775	-0.204854	0.270944	0.0707448	0.0948153	0.207608	0.265869	NO	58	5	YVFLLYK	34	LGDPIAANMYQAEFDDYVPLLYK	122	GDVLSDYIGSGPPK	138
66524926	NP_725886.1	FBgn0004873	N/A	0.63171	0.335107	0.58823	0.296737	0.334752	0.312424	0.992955	0.0360778	0.233309	-0.291547	0.154222	-0.32407	-0.363018	-0.419099	2.06223	-1.05203	0.212809	NO	23	6	IMLLTNR	28	AIFEASR	34	IGGTEFEALMR	34
66525165	NP_647745.1	FBgn0035370	N/A	0.308793	0.708956	0.631541	0.0143771	0.306276	0.929642	0.681811	0.349565	-0.168606	0.208086	0.127426	-0.807173	-0.268346	0.789535	0.244448	-0.125369	0.40435	NO	50	2	EITAILK	39	AITLSPELAAVVGAEQMAR	80	0	#N/A
66525285	NP_524538.2	FBgn0003279	K02930	0.98845	0.739882	0.421868	0.063502	0.268247	0.314632	0.532256	0.632021	0.943619	0.296339	-0.0883197	-0.654197	-0.374307	-0.300827	0.0491878	0.128505	0.334254	NO	55	10	NESSGDTISLPAVFK	127	QAVIFLR	42	QILAAR	28
66525391	NP_477409.1	FBgn0026150	K01262	0.112755	0.0901375	0.0603302	0.398735	0.839315	0.673955	0.976306	0.147204	-0.502052	-0.641373	-0.724511	-0.118163	0.683714	0.401193	1.31174	-0.410548	0.219478	NO	36	4	AVQIGGLK	39	ALLWTDGR	46	YFAWLEDQIK	72
66525522	NP_610886.2	FBgn0014877	K03687	0.173006	0.834963	0.95272	0.745704	0.144125	0.489823	0.252146	0.512016	-0.328224	0.381796	0.65898	0.239509	-0.580833	-0.0138854	-0.367251	0.00990899	0.533631	NO	58	1	DLLEVADILGK	98	0	#N/A	0	#N/A
66525576	NP_648484.1	FBgn0086254	K00011	0.494361	0.426594	0.177111	0.897797	0.946894	0.0447999	0.308886	0.810534	-0.00188836	-0.0274642	-0.138419	0.177586	0.332755	-0.352728	-0.102346	0.112503	0.343036	NO	58	13	NIGISNFNSEQIER	101	GHIVIPK	40	SKPGEVTQSVK	53
66525794	NP_650448.1	FBgn0038321	K00884	0.495849	0.235994	0.778927	0.942924	0.678327	0.0388535	0.587166	0.621071	-0.0123301	-1.00684	1.04056	2.38796	0.761718	-3.95813	0.482772	0.304288	0.401377	NO	17	2	YVFDDIDDLAK	80	HVIALAK	42	0	#N/A
66525954	NP_524848.1	FBgn0001186	K00844	0.702546	0.992356	0.0527831	0.816804	0.159742	0.0982732	0.350549	0.984817	0.240465	1.14721	-0.841157	0.362342	-0.616351	-0.817813	-0.311782	0.837086	0.0593974	NO	18	3	MISGMYMGELVR	84	GNFLALDLGGTNFR	83	QLMDTLNDQLHK	49
66526642	NP_524608.1	FBgn0028968	N/A	0.696722	0.658723	0.255478	0.56662	0.635649	0.15094	0.820704	0.409097	0.348425	0.289811	-0.457547	0.105523	0.325396	-1.3768	0.948547	-0.183354	0.869816	NO	18	2	ELSSLAEDVIIVTSSLTK	44	VVVVQAIR	42	0	#N/A
66526646	NP_649017.1	FBgn0036762	K00382	0.0059039	0.185223	0.0747905	0.184773	0.940836	0.952662	0.889868	0.206655	-0.964319	-0.394742	-0.570794	-0.364696	0.882139	0.94888	0.734055	-0.270522	0.0677189	NO	46	5	NIIIATGSEVTPFPGIEFDEK	32	GIIVENVK	55	QILSSTGALSLDTIPK	162
66529463	NP_524011.1	FBgn0019644	K02127	0.830072	0.0469537	0.744132	0.326146	0.516408	0.819674	0.378648	0.36404	0.286476	-0.571159	0.22019	-0.140503	0.0192777	0.430503	-0.146188	-0.0985982	0.593705	NO	58	3	NENIEEIQNQINELEK	52	IDGQLMVYDVK	56	LGFIPDEWFK	68
66529683	NP_611265.1	FBgn0034277	K12667	0.943142	0.404731	0.787181	0.645242	0.551657	0.629791	0.081369	0.617747	0.951583	-0.134465	0.440832	0.228691	0.0960835	0.374078	-2.14373	0.186929	0.70467	NO	19	2	MANYLLSR	61	IFTNTIEK	32	0	#N/A
66529866	NP_650922.1	FBgn0038834	K02983	0.305077	0.178485	0.87753	0.0293105	0.726695	0.359946	0.810435	0.803604	-0.431098	-0.872721	1.02601	-1.65761	0.698197	-0.536442	1.04114	0.732523	0.354424	NO	32	1	FVNVVQTYSR	76	0	#N/A	0	#N/A
66529931	NP_476969.1	FBgn0010426	K02151	0.308119	0.0385496	0.933212	0.0368938	0.777715	0.750405	0.916049	0.0392812	-0.178297	-0.687622	0.587984	-0.664927	0.417259	0.353202	0.761458	-0.589058	0.0724352	NO	53	3	GMFNPEDIH	55	NTAVSDIEDTFK	79	HVIDSHTQPIPSVLEIPSK	40
66530010	NP_651578.1	FBgn0039537	N/A	0.0657679	0.0998158	0.123981	0.223802	0.987989	0.313359	0.914069	0.547471	-0.395707	-0.382492	-0.329469	-0.205947	0.886944	-0.202242	0.599772	0.0291415	0.166331	NO	52	8	FETNIISAVENAVNK	79	NHIAYTISK	43	INVLNK	25
66530076	NP_649588.1	FBgn0028690	K03035	0.881162	0.163345	0.256006	0.958865	0.679737	0.206295	0.172064	0.797019	0.547102	-0.507724	-0.353731	0.921045	0.350446	-0.595373	-0.748319	0.386553	0.368152	NO	42	5	LFVNPELIK	60	LHDALDQLLALEK	76	YYDLMMELAR	62
66530240	NP_651000.1	FBgn0038922	K00030	0.170775	0.628672	0.157244	0.0165165	0.86929	0.838638	0.867158	0.194148	-0.319536	0.132247	-0.341879	-0.743105	0.511569	0.529316	0.496112	-0.264723	0.220637	NO	39	4	LGDGLFLK	66	AANVPVEFEPYFLSEVNPTLSAPLEQVSNSIAR	83	SLDLYSNVVHVK	65
66530257	NP_523742.2	FBgn0010397	K07611	0.510838	0.455946	0.854949	0.0558741	0.391201	0.315169	0.711118	0.840949	0.0145307	-0.0618045	0.574232	-0.911152	-0.230743	-0.38083	0.506047	0.48972	0.668349	NO	31	5	IVLENNIQSLK	72	INELEAANNALTAR	73	NLLLYETR	52
66530260	NP_611352.1	FBgn0000566	K01758	0.539833	0.839362	0.954544	0.519337	0.16432	0.0566992	0.371865	0.899773	0.0385085	0.494668	0.758366	0.0187821	-0.605097	-0.994086	-0.217514	0.506373	0.394826	NO	24	4	MIWLETPTNPLLK	60	VIDIEAVTQAVK	67	DILADLDQALK	65
66530404	NP_523532.1	FBgn0250843	K02725	0.239624	0.349013	0.420444	0.337012	0.518177	0.314598	0.923852	0.603348	-0.17785	-0.116148	-0.0538861	-0.115181	0.0177049	-0.204993	0.589397	0.0609551	0.906025	NO	51	4	LGSATVGLK	61	NVSIAIVGK	51	LHQVEYAMEAVK	46
66531366	NP_511057.1	FBgn0003514	K12755	0.223925	0.821927	0.945417	0.309516	0.312576	0.620406	0.299621	0.247896	-0.166538	0.280492	0.38098	-0.107366	-0.158663	0.10122	-0.190225	-0.1399	0.653769	NO	26	1	GSMFDYIEFTR	85	0	#N/A	0	#N/A
66531429	NP_651762.1	FBgn0039737	N/A	0.0344226	0.145108	0.890525	0.984104	0.822419	0.126957	0.338916	0.64986	-0.293814	-0.189267	0.220207	0.36338	0.228892	-0.284119	-0.103412	0.0581349	0.123527	NO	58	7	YVVTEYGIASLFGK	111	SYELIQIAHPDHR	28	LGSGVVTNR	80
66531474	NP_651825.3	FBgn0039802	K05687	0.432839	0.282284	0.366199	0.543618	0.676986	0.343735	0.624097	0.690867	-0.047464	-0.19245	-0.105165	0.0336419	0.230685	-0.182428	0.13739	0.12579	0.993946	NO	50	4	QITSYPAMK	47	LQDVINQK	32	VVIDDNLITSR	76
66531851	NP_524079.1	FBgn0014002	K09580	0.67173	0.516097	0.344445	0.97363	0.0813278	0.296484	0.666253	0.593385	0.0996988	0.0100704	-0.100148	0.459671	-0.483612	-0.184801	0.148708	0.0504125	0.555056	NO	58	10	GSAIDYSGGR	66	NLSTVEEAK	33	KLQDGGFPIK	49
66532597	NP_511096.2	FBgn0014868	K12670	0.966603	0.649999	0.306699	0.259512	0.0547815	0.700797	0.372454	0.872884	0.510617	0.117161	-0.150134	-0.178262	-0.672821	0.219117	-0.142132	0.296453	0.411787	NO	56	5	TLQDNGYILTFK	82	IVADPANLIDAPAIVGNK	88	NINSLLYQGTGLIADTENPLILR	89
66532757	NP_732020.2	FBgn0038326	K05605	0.476552	0.280086	0.358056	0.449823	0.0199635	0.394541	0.975165	0.945106	-0.0214639	-0.242319	-0.146074	-0.0494264	-1.25812	-0.159527	1.29359	0.583335	0.254832	NO	42	6	ALNALNLSMVEK	88	AVLIDK	50	LVIIEGAGDK	54
66533098	NP_648514.1	FBgn0036213	K02865	0.998846	0.45315	0.544685	0.786737	0.0425151	0.0906532	0.687947	0.39173	0.824732	-0.0334836	0.0314107	0.214507	-0.661177	-0.512996	0.203845	-0.0668387	0.0662429	NO	52	4	ILGPGLNK	52	ANNIPYMDAEALKK	51	ANNIPYMDAEALK	87
66533332	NP_477445.1	FBgn0027095	N/A	0.736563	0.496628	0.838948	0.321355	0.243792	0.467905	0.47115	0.594983	0.227063	-0.00348434	0.403454	-0.185238	-0.431781	-0.0443692	-0.0397766	0.0741329	0.962382	NO	42	2	QIDINTVDLK	51	FVNTLSEDVK	71	0	#N/A
66533395	NP_788888.1	FBgn0030086	K09494	0.481714	0.70551	0.742473	0.234034	0.492569	0.440579	0.336989	0.704931	-0.0157548	0.212334	0.245985	-0.27075	-0.00964384	-0.0773336	-0.258113	0.173277	0.984307	NO	40	8	GSGNLSAIQVIK	76	ALQQLPTVIADNAGYDSAQLISELR	94	GGTLADSFLDDGFLLDK	144
66533950	NP_523905.2	FBgn0004888	K01899	0.521631	0.569233	0.16922	0.0706786	0.406955	0.989434	0.365023	0.268292	0.0136097	0.0508433	-0.264364	-0.412437	-0.0849477	0.980509	-0.136991	-0.146222	0.374082	NO	48	4	AGVIVSR	60	IVGGVNPK	43	MGHAGAIISGGK	60
66534286	NP_477369.1	FBgn0261014	K01509	0.139407	0.777365	0.295785	0.728324	0.406183	0.272749	0.828442	0.505857	-0.144668	0.114245	-0.0799534	0.0842645	-0.0492964	-0.125959	0.199516	0.00185038	0.820156	NO	58	17	NSPAIIFIDELDAIAPKR	30	GILLYGPPGTGK	94	VIGVKPPR	34
66534424	NP_722961.1	FBgn0031589	K00763	0.632572	0.844884	0.906556	0.0539194	0.025378	0.928726	0.0946109	0.888624	0.169641	0.628371	0.650958	-0.920075	-1.45256	1.40041	-1.07987	0.603134	0.133525	NO	20	2	NITLLEFGLR	61	VYDLLELAYK	52	0	#N/A
66534655	NP_725653.1	FBgn0010226	K00799	0.151848	0.420701	0.242343	0.635584	0.917135	0.32508	0.531925	0.537774	-0.216256	-0.0469098	-0.164008	0.0755349	0.454511	-0.14797	0.0262523	0.0188457	0.841103	NO	58	8	IADEVVPYYLER	93	SWLDK	30	LDAQVK	28
66534671	NP_573109.1	FBgn0030731	K12405	0.0156507	0.714517	0.983721	0.88319	0.769798	0.0893402	0.291654	0.466239	-0.690733	0.214313	0.700171	0.39067	0.394441	-0.675289	-0.307797	-0.0257763	0.0998292	NO	31	7	MLESDWDLIQNVHLK	33	LTEDILPPDFFK	78	ITGNIMLTQK	36
66535209	NP_476772.1	FBgn0003884	K07374	0.0189408	0.814489	0.143419	0.7063	0.889994	0.214736	0.648812	0.699489	-0.354602	0.166796	-0.19941	0.0943548	0.314561	-0.203205	0.0980898	0.0834154	0.288418	NO	58	15	EIVDLVLDR	89	QLFHPEQLITGK	84	LDHKFDLMYAK	48
66535742	NP_610181.2	FBgn0259979	K08660	0.82899	0.499366	0.965957	0.270806	0.517973	0.0383203	0.520355	0.61497	0.0993457	-0.000186039	0.216442	-0.0663603	0.00735662	-0.293877	0.00840754	0.0288708	0.464665	NO	58	15	QLFNYIDDHK	46	EDGWDSEPFILTEK	88	NIILLPIGASDDGAHSQNEK	72
66535957	NP_611063.1	FBgn0022160	K00111	0.938578	0.0412687	0.915217	0.280209	0.981634	0.16748	0.184459	0.242228	0.399554	-0.534076	0.400911	-0.161693	0.829885	-0.404366	-0.364191	-0.166024	0.0948224	NO	49	5	NYLNPDVEVR	30	SSYFLSK	26	VVNLLK	42
66536233	NP_729469.2	FBgn0035978	K00963	0.0131232	0.390397	0.87119	0.153673	0.950799	0.664202	0.70917	0.0411096	-0.470411	-0.0662121	0.260077	-0.225474	0.529105	0.139357	0.175717	-0.34216	0.124505	NO	56	10	LLLDKR	42	SFEGSIGINVPR	65	MFPTTPLIK	46
66537377	NP_001036387.1	FBgn0064225	K02932	0.998456	0.588295	0.375855	0.606856	0.350806	0.290007	0.118865	0.595252	0.783771	0.0642352	-0.0909339	0.0759108	-0.159376	-0.238896	-0.493591	0.0588795	0.191439	NO	51	2	QFSQYIK	29	GAVDGGLNIPHSTK	80	0	#N/A
66538476	NP_523710.1	FBgn0000253	K02183	0.934783	0.746086	0.834275	0.140734	0.322324	0.54407	0.329074	0.149742	0.311384	0.151973	0.222589	-0.229883	-0.147375	0.0353636	-0.142652	-0.201399	0.573047	NO	58	6	DGNGFISAAELR	79	EAFSLFDK	73	HVMTNLGEK	69
66540596	NP_649835.1	FBgn0037632	K09499	0.500126	0.941517	0.524399	0.649378	0.123723	0.372126	0.157857	0.965271	6.8269e-05	0.388418	0.0146267	0.0902203	-0.396211	-0.111234	-0.361875	0.375987	0.429739	NO	53	7	AIMMLDEMLPLNMIGIK	53	ALEVIPR	43	QPQIILLK	25
66541426	NP_725669.1	FBgn0016697	K02729	0.967439	0.648041	0.446993	0.678172	0.19608	0.374831	0.097777	0.891285	0.571909	0.131055	-0.0425637	0.149155	-0.365186	-0.175193	-0.609427	0.340251	0.446949	NO	48	4	AELQEVIK	72	LFQVEYAIEAIK	83	SMTLQEAIK	73
66543659	NP_524687.1	FBgn0086710	K02908	0.965787	0.743729	0.478691	0.90646	0.168799	0.189138	0.11566	0.804509	0.447194	0.188444	-0.0146723	0.368472	-0.375089	-0.34816	-0.46785	0.201662	0.35748	NO	45	3	LVIIANNAAPLR	97	LALVMK	40	SEIEYYAMLAK	60
66544702	NP_610418.1	FBgn0033342	K09500	0.0943492	0.659527	0.240505	0.78756	0.46024	0.0870963	0.737967	0.973547	-0.412378	0.150852	-0.258507	0.281428	-0.049024	-0.618881	0.332711	0.5738	0.280748	NO	42	9	LIVLASK	43	TVGATALSK	26	VNQIIMAK	53
66545506	NP_524293.2	FBgn0005585	K08057	0.586701	0.938912	0.474912	0.753645	0.4731	0.423243	0.0777421	0.514438	0.0576295	0.452586	-0.0182202	0.185149	-0.0269615	-0.0804074	-0.578792	0.00901747	0.742519	NO	57	12	FLDDSWEK	47	GPWIHPEIDNPEYTPDPELYK	76	NLLINK	25
66546646	NP_728869.1	FBgn0035438	K00432	0.154554	0.796117	0.0861744	0.661163	0.972722	0.322928	0.624074	0.0471994	-0.224033	0.203811	-0.337804	0.0948813	0.664975	-0.156819	0.108366	-0.353376	0.242473	NO	58	6	EQGGILGDFIK	94	SIYDFTAK	56	IDVNGDSAHPLWK	69
66546799	NP_476630.1	FBgn0002593	K02942	0.990044	0.911068	0.424453	0.841944	0.0123161	0.232328	0.367142	0.685979	0.370904	0.235258	-0.0329982	0.162415	-0.549661	-0.175796	-0.0816721	0.0715503	0.117395	NO	58	4	AANVDVESYWPGLFAK	134	ALEGVNIK	58	ELITNIGSGVGK	113
66546988	NP_524311.1	FBgn0022359	K08322	0.155348	0.0479074	0.0580785	0.194902	0.686334	0.938834	0.968761	0.310116	-0.41242	-0.758774	-0.716595	-0.36294	0.298873	0.968839	1.17452	-0.191501	0.184342	NO	58	5	SVTISEPQEK	47	DGFLTLGHEFAGTVDAIGSSVK	94	FSIEPFQVYLK	74
66547438	NP_649925.1	FBgn0037728	N/A	0.193828	0.269184	0.211252	0.913384	0.210348	0.756398	0.723773	0.642732	-0.353545	-0.284025	-0.370367	0.583728	-0.539647	0.447636	0.37076	0.145461	0.71373	NO	54	1	TLELVLFK	64	0	#N/A	0	#N/A
66547531	NP_476860.2	FBgn0004654	K00033	0.0597095	0.255428	0.162878	0.814577	0.919318	0.601165	0.72596	0.135497	-0.196964	-0.0922519	-0.138114	0.116879	0.274293	0.0499158	0.117745	-0.131503	0.461468	NO	58	12	LPANLLQAQR	86	GELDSFLIEITR	122	QFLEHLK	47
66547758	NP_650356.1	FBgn0038224	K02129	0.840848	0.393901	0.903536	0.011273	0.840089	0.43644	0.165694	0.803671	0.482347	-0.142938	0.818061	-1.23568	0.608118	-0.139415	-0.745129	0.35464	0.151816	NO	20	2	LLEAEAK	37	MIEEWSGIKK	44	0	#N/A
66548188	NP_477510.1	FBgn0040309	K03386	0.813025	0.602458	0.750964	0.784284	0.0530097	0.10783	0.398056	0.980875	0.157662	0.0508413	0.133294	0.144787	-0.437844	-0.336169	-0.0695743	0.357003	0.301975	NO	58	10	DISLSDYQGK	65	GLFIIDDK	82	LVQAFQYTDK	98
66548261	NP_649846.2	FBgn0037643	K01900	0.519802	0.273708	0.757273	0.0155317	0.966973	0.889676	0.108655	0.276325	0.010222	-0.138667	0.160028	-0.487265	0.574445	0.395155	-0.399536	-0.114382	0.160374	NO	53	6	LASQMLGK	59	ELFSLR	27	LHGGEPANFLDVGGGASTSAVK	116
66548758	NP_570080.1	FBgn0028665	K02146	0.863774	0.248321	0.894495	0.0827239	0.798201	0.631643	0.304057	0.0877117	0.373143	-0.252399	0.467839	-0.490414	0.418385	0.185836	-0.264839	-0.437551	0.374453	NO	54	4	LHLAGTDYGSFLANEPSPLSVSVIDDK	80	LNPDGLAALAR	71	IDNYIPIF	35
66548942	NP_611228.1	FBgn0034237	K03253	0.366039	0.561921	0.390451	0.933981	0.439383	0.670795	0.131527	0.59134	-0.285042	0.153657	-0.220252	1.18837	-0.195963	0.572908	-1.35777	0.144086	0.806899	NO	16	5	NVEEEVIEFFVK	73	IQEWNNQK	31	VNLFTDFK	38
66549344	NP_511052.1	FBgn0000042	K05692	0.799413	0.66883	0.817885	0.126891	0.687894	0.638039	0.170763	0.155441	0.0990737	0.0570121	0.119175	-0.140328	0.0874951	0.0635332	-0.171688	-0.114273	0.698227	NO	58	20	GYSFTTTAER	83	TTGIVLDSGDGVSHTVPIYEGYALPHAILR	54	IIAPPER	46
66549732	NP_511062.1	FBgn0014031	K00830	0.806937	0.587423	0.452122	0.937453	0.0378644	0.47836	0.586252	0.397254	0.609319	0.165662	-0.0884642	1.11133	-1.79649	-0.0646538	0.227285	-0.163989	0.564316	NO	44	2	SGIWSER	29	EALAEIAEEGLQALWNR	76	0	#N/A
66549799	NP_523886.1	FBgn0026372	K02893	0.818592	0.939818	0.915844	0.149346	0.0178414	0.839404	0.138534	0.76141	0.43346	0.918059	0.693972	-0.599655	-1.62297	0.749093	-0.901546	0.329584	0.18079	NO	31	3	LYDVDVAK	45	MDAFNIIK	45	FPLTTEAAMK	27
66549815	NP_524816.1	FBgn0002565	K01290	0.345601	0.341594	0.0781011	0.541648	0.523088	0.99004	0.13812	0.928344	-0.572604	-0.808392	-2.59297	0.174977	0.191198	4.48686	-3.06325	2.18418	0.172648	NO	19	18	NAIFTPLNSEQK	60	QGMFLSR	27	MLFELLYNAK	63
66550509	NP_650287.3	FBgn0038149	K08059	0.317445	0.80806	0.23051	0.722974	0.110091	0.0297927	0.973871	0.949209	-0.277317	0.578899	-0.477874	0.363559	-1.14708	-1.77929	1.76695	0.972153	0.134239	NO	43	3	QQLLPQYDILK	75	EIQSAAQNNFFK	86	DYISVSFIPYGK	70
66550870	NP_524303.2	FBgn0024957	K01681	0.0563747	0.429903	0.727055	0.909834	0.519632	0.686375	0.0305404	0.896978	-0.868453	-0.131377	0.340246	0.62394	0.0474449	0.685216	-1.21821	0.521189	0.135846	NO	17	6	VDTVGLFEYEGK	27	DQTPLIILVGK	56	GTFANIR	30
66550890	NP_524546.2	FBgn0014869	K01834	0.000504741	0.648832	0.774438	0.747533	0.557619	0.947562	0.270391	0.482474	-1.58938	0.20111	0.38213	0.329163	0.0961087	1.03263	-0.433444	-0.018317	0.0642983	NO	30	5	YYEIIVNDPR	35	AAMAAVAAQAK	77	YTIVMVR	32
66551478	NP_652012.1	FBgn0028969	N/A	0.744823	0.488591	0.340981	0.553551	0.00552401	0.41104	0.952754	0.54769	0.262847	-0.0137892	-0.178855	0.056062	-1.62844	-0.140409	1.59906	0.0435271	0.248885	NO	33	1	ASNILEDLETLR	101	0	#N/A	0	#N/A
66551967	NP_523530.1	#N/A	K02873	0.789344	0.286785	0.784943	0.0100109	0.305411	0.768685	0.738207	0.528815	0.436606	-0.352893	0.466433	-1.41941	-0.399449	0.645059	0.584991	0.0386596	0.352596	NO	47	2	LILFPLNEK	52	GFTLEELK	56	0	#N/A
66552230	NP_608905.1	FBgn0028694	K03030	0.773089	0.0794263	0.918834	0.235178	0.834745	0.195935	0.491286	0.494618	0.190117	-0.408333	0.38687	-0.187955	0.374863	-0.343984	-0.00845086	-0.00312744	0.513137	NO	56	4	MLDMLK	36	VVIDAFR	48	VIDVFAMPQTGTGVSVEAVDPVFQAK	58
66552871	NP_572165.1	FBgn0029709	N/A	0.99504	0.84992	0.564444	0.309651	0.831604	0.251408	0.126392	0.646076	1.53032	0.710183	0.11104	-0.345543	0.869414	-1.13218	-1.96565	0.222413	0.271932	NO	17	1	ELSTSLWGVK	74	0	#N/A	0	#N/A
66553147	NP_477437.1	FBgn0026753	K02152	0.709388	0.170825	0.204334	0.413163	0.582211	0.783525	0.623217	0.565914	0.366041	-0.691749	-0.709051	-0.0925435	0.148201	0.640966	0.241627	0.0965098	0.927964	NO	17	3	IKTEEMNQTVSMHK	30	EEAQDEIEK	65	DSVVHTILELVYDIK	93
66553455	NP_610914.2	FBgn0033883	K08070	0.884176	0.0806553	0.933673	0.93064	0.0336425	0.354998	0.415959	0.855696	0.203761	-0.26833	0.283258	0.259393	-0.495827	-0.0962287	-0.0551221	0.169097	0.154798	NO	57	8	NPNFPVGK	32	ELGFDHAVNYK	38	YPIGSTMIGSQVGK	104
66553833	NP_722915.1	FBgn0051954	K01312	0.691242	0.873191	0.409388	0.927159	0.182776	0.298036	0.128582	0.825532	0.167746	0.428315	-0.0856348	0.512641	-0.463996	-0.273068	-0.586925	0.300923	0.552376	NO	58	7	CAEPNYPGVYTNVAHLR	78	NYNTITDR	58	DQGTIYTLK	78
66554156	NP_524550.1	FBgn0020235	K02136	0.301931	0.156148	0.05668	0.0590675	0.568154	0.999389	0.125912	0.403686	-0.22096	-0.643017	-0.759044	-0.695419	0.120121	3.0358	-0.736605	-0.100879	0.0635642	NO	24	6	ELIEIISGAAALD	43	QARPLGVGTK	33	LVVAITSDR	29
66554330	NP_511106.1	FBgn0011770	K01816	0.313035	0.768653	0.478227	0.960165	0.0513264	0.292803	0.759125	0.573793	-0.125177	0.217508	-0.0157085	0.486842	-0.665626	-0.22941	0.286307	0.0452637	0.460141	NO	57	5	GLDVIKK	51	EGIIALIEPINNITVPNYYMNSFQK	76	GLDVIK	40
66554916	NP_570046.1	FBgn0029648	K00059	0.82193	0.186542	0.592038	0.274299	0.919382	0.380679	0.392971	0.202151	0.241307	-0.254893	0.0674621	-0.164668	0.538865	-0.120552	-0.108335	-0.199187	0.737894	NO	48	7	QGASVIATDINLK	61	VLNVNLK	36	VNTVLPGFIETPMTK	27
66555372	NP_651954.3	FBgn0024733	K02866	0.776506	0.36607	0.115595	0.164142	0.382623	0.685927	0.695772	0.799576	0.33174	-0.162975	-0.537082	-0.43963	-0.17944	0.317191	0.34744	0.322756	0.773439	NO	41	3	YLPEHGPLDEWKK	34	IFDLGK	39	AAVVEALRR	55
66555437	NP_524586.1	FBgn0002773	K01509	0.0821824	0.785764	0.873287	0.498707	0.832434	0.614736	0.244738	0.0289153	-0.738146	0.50448	0.743324	-0.00184086	0.863131	0.234092	-0.555919	-1.04912	0.400154	NO	33	6	GFIDTQSLIAMLTGQEDEDEE	141	ELDDMLNEAPAPINFTQLLNLFASR	112	ATFDNVGR	38
66557463	NP_477360.2	FBgn0024841	K01724	0.646422	0.337122	0.364507	0.764062	0.393738	0.410012	0.491466	0.750986	0.326933	-0.364852	-0.297707	0.594073	-0.372362	-0.315058	-0.0259557	0.454929	0.9777	NO	19	2	EFLFK	28	LASFIDNIAK	70	0	#N/A
66557660	NP_609193.1	FBgn0031999	N/A	0.954786	0.633584	0.136734	0.395025	0.342743	0.572799	0.123816	0.911668	1.44615	0.325338	-1.05493	-0.256553	-0.464929	0.352417	-1.40952	1.06204	0.404141	NO	24	2	FQQGVQTLLK	76	DQSANFVNNIQDYIK	99	0	#N/A
66557666	NP_649777.1	FBgn0037561	K01529	0.856116	0.589999	0.0254547	0.290798	0.276648	0.638752	0.783212	0.60606	0.88109	0.204437	-1.56325	-0.519719	-0.706666	0.466476	1.02456	0.213076	0.577656	NO	22	1	IINLAGYVK	38	0	#N/A	0	#N/A
66558612	NP_611386.2	FBgn0034405	K01253	0.222041	0.629654	0.12906	0.88006	0.703046	0.0671568	0.511901	0.973721	-0.244785	0.116812	-0.402793	0.392005	0.256889	-0.734348	0.0144466	0.601774	0.267878	NO	58	7	KIENLTSK	52	IDQLPIK	38	LYAENYTSSYR	88
66558829	NP_511049.1	FBgn0004687	K12752	0.686614	0.570109	0.699004	0.0751069	0.937015	0.767714	0.0809519	0.183441	0.196573	0.0883082	0.243362	-0.664614	0.911724	0.511136	-0.933501	-0.352988	0.401561	NO	39	2	IHVAQIGDALR	30	HLLTTLGEK	73	0	#N/A
66558893	NP_523628.1	FBgn0000473	K00517	0.218819	0.333868	0.364601	0.255686	0.963369	0.0925114	0.675643	0.989454	-0.774505	-0.632084	-0.383299	-0.728383	2.48466	-2.5861	0.582049	2.03767	0.114807	NO	22	4	NNPALVIK	32	IFQETLR	26	TLIPYK	30
66558942	NP_609579.1	FBgn0032444	K09496	0.222067	0.986578	0.826922	0.861964	0.514234	0.0267296	0.150301	0.801648	-0.260713	0.866127	0.353571	0.381629	0.0181146	-1.08312	-0.55155	0.275942	0.132489	NO	54	7	LVLEEAER	29	DAVSDLAIHFLDK	78	IDDIVNTNQ	44
66558956	NP_523813.1	FBgn0010078	K02894	0.652488	0.276229	0.214705	0.444831	0.0642483	0.882508	0.678321	0.809621	0.116635	-0.218502	-0.26543	-0.0433143	-0.689774	0.615724	0.231872	0.252789	0.676698	NO	43	5	NLYVIAVQGIK	66	LPAAGSGDMIVATVK	93	VMPAVVIR	57
66559019	NP_609310.2	FBgn0032144	K01290	0.603326	0.803271	0.0310441	0.870722	0.379271	0.216331	0.556865	0.892464	0.0777119	0.283475	-0.629105	0.350688	-0.140228	-0.36097	0.0657858	0.352643	0.397686	NO	58	4	ANPKVEVVVGGK	62	SLSEFISSISNK	105	NLEDVSDAFSFWK	73
66559145	NP_649133.1	FBgn0036892	K08675	0.40643	0.768735	0.925919	0.20101	0.585253	0.705801	0.104643	0.309543	-0.0767321	0.363456	0.52432	-0.356491	0.127295	0.321354	-0.730355	-0.172845	0.721579	NO	21	5	LIELSNPILMDLIR	122	TVMDVLEEELNK	40	VVDNPVYLSDLGAALTGADAQELQQVLEEMDILK	77
66559208	NP_651876.1	FBgn0039857	K02934	0.867486	0.848735	0.738863	0.020616	0.488506	0.410245	0.446444	0.338835	0.819463	0.982092	0.489817	-1.61824	-0.0339977	-0.234211	-0.132287	-0.27264	0.468482	NO	29	2	FVISAIK	44	IPSHINDDYFK	31	0	#N/A
66560172	NP_524450.2	FBgn0003676	K09493	0.983015	0.856862	0.749443	0.785089	0.405709	0.0642992	0.141494	0.336034	0.484661	0.270921	0.169635	0.18897	-0.082355	-0.530999	-0.409684	-0.0911502	0.295457	NO	55	9	TASSMILR	30	STVASPLVVGGVR	48	SSLGPVGLDK	79
66562243	NP_476938.1	FBgn0010265	K02953	0.665493	0.707375	0.758278	0.00180251	0.472653	0.833058	0.688496	0.179951	0.201076	0.297527	0.372678	-1.49342	-0.0507911	0.719407	0.368323	-0.414801	0.159146	NO	53	7	GTLPANWK	35	YESSTASALVA	41	SVPTWLK	42
66563290	NP_650572.2	FBgn0015019	K09495	0.94568	0.375801	0.525915	0.902241	0.138556	0.148314	0.694158	0.384182	0.405314	-0.0861416	0.0172274	0.341496	-0.39694	-0.416047	0.202815	-0.0677236	0.512218	NO	52	13	AGLFEIK	42	NLLIEPK	42	TAIETAILLLR	70
66563717	NP_001097859.2	FBgn0038886	K00699	0.890031	0.466207	0.154091	0.971838	0.523615	0.0237526	0.357059	0.942835	0.559804	-0.0422052	-0.516713	0.906452	0.0403056	-1.38602	-0.251303	0.689677	0.151994	NO	57	7	NVAVNLGSFK	63	LSELFK	27	SLVETFYK	45
66564326	NP_996291.1	FBgn0039234	N/A	0.0523858	0.410428	0.273802	0.308421	0.933532	0.429975	0.888416	0.204862	-0.848978	-0.130309	-0.347468	-0.268696	1.18332	-0.138487	0.961677	-0.411056	0.505306	NO	57	12	NVVADFR	38	SPNQGPDISTWINEGVPGGSLWNQDDK	71	AIMNEALNGSFK	91
66564518	NP_524819.1	FBgn0034968	K02870	0.978781	0.720153	0.937204	0.181367	0.278979	0.322243	0.0200192	0.930943	0.340734	0.107845	0.285503	-0.156566	-0.150419	-0.118704	-0.542551	0.234158	0.114859	NO	58	4	IGPLGLSPK	63	QATISVVPSAASLIIK	72	DLIEEINGGK	66
66564615	NP_511150.1	FBgn0000173	K10580	0.539098	0.350337	0.762862	0.653761	0.845287	0.58508	0.0927377	0.198842	0.089572	-0.477959	0.824752	0.380043	1.63388	0.291575	-2.12186	-0.619994	0.794056	NO	17	1	LELFLPEDYPMSAPK	91	0	#N/A	0	#N/A
66565249	NP_524808.2	FBgn0028737	K03232	0.555156	0.970187	0.433983	0.697574	0.1136	0.153892	0.210268	0.983524	0.0416873	0.650478	-0.0503787	0.168047	-0.515149	-0.539599	-0.335112	0.580027	0.197974	NO	29	4	SIQMDGLTWAASK	95	DLNSYLADHSYIEGWQPTQADVVILEALGK	43	AIEEIVR	52
66565444	NP_477161.1	FBgn0015756	K02940	0.986342	0.892278	0.501755	0.828067	0.0109231	0.655737	0.189167	0.527842	0.482854	0.295528	0.00104065	0.217333	-0.833648	0.13626	-0.313672	0.014304	0.142011	NO	53	6	MAPGVTVTNSAK	88	SAALIQQSTTVK	99	HLALDIR	37
74271822	NP_651740.1	FBgn0039713	K02995	0.932747	0.948491	0.845822	0.311183	0.466016	0.109166	0.319816	0.331112	0.582086	0.656011	0.463516	-0.206449	-0.0481727	-0.960928	-0.325126	-0.160938	0.48807	NO	32	4	VEPALEEQFATGR	113	IIDVVYNASNNELVR	73	NAIVTIDATPFR	89
94158657	NP_523628.1	FBgn0000473	K00517	0.218759	0.427568	0.0148722	0.820885	0.645811	0.595666	0.806246	0.580229	-0.356743	-0.0878092	-1.08766	0.462165	0.232042	0.159318	0.589846	0.0888444	0.48614	NO	38	2	LSPIFTSGK	48	SPFLLLNDPELIK	72	0	#N/A
94400893	NP_001014738.1	FBgn0004169	K12046	0.300285	0.174055	0.910105	0.0239312	0.851518	0.845709	0.6578	0.052191	-0.134186	-0.26613	0.383473	-0.536508	0.402829	0.396183	0.157098	-0.402758	0.187298	NO	58	9	QAMMQAMK	53	IKPLEIDGFSIEK	105	DLAGNLTSAQLER	101
94400899	NP_728141.1	FBgn0004028	N/A	0.945541	0.395172	0.444704	0.565124	0.961029	0.290131	0.475441	0.0192705	0.756586	-0.112528	-0.0616303	0.068971	0.983932	-0.456721	-0.0528037	-1.12581	0.309222	NO	15	7	AAEFNFR	37	NVDDASEESLK	65	EFTLEEEDK	39
100815792	NP_725155.3	FBgn0050048	K11126	0.98105	0.0197313	0.11749	0.33051	0.958146	0.218605	0.406467	0.859091	1.46325	-1.65284	-0.902628	-0.324932	1.79978	-0.827377	-0.244326	0.689076	0.0618758	NO	54	1	NIHIIGK	36	0	#N/A	0	#N/A
110748925	NP_727252.1	#N/A	K00383	0.4901	0.944015	0.879992	0.409908	0.603877	0.222607	0.387255	0.0452758	-0.00354707	0.257173	0.189077	-0.0338784	0.0581007	-0.169699	-0.0637558	-0.23347	0.454843	NO	58	11	GFDQQMASTVAQEMERR	54	IDAIDEQTNVPNVYAVGDVLHK	109	SVNWVTR	46
110748949	NP_524515.2	FBgn0000064	K01623	0.00254307	0.547723	0.557348	0.604643	0.789471	0.820569	0.489831	0.392664	-0.522254	0.0238752	0.0287897	0.0494062	0.22036	0.253351	-0.00701393	-0.0465142	0.263267	NO	58	10	ALQASVLR	70	EQISAGQEELIK	73	ASPQEIAAATVTALLR	143
110749126	NP_572979.1	FBgn0030590	K00108	0.324613	0.618733	0.0376029	0.992095	0.834173	0.188846	0.159281	0.859901	-0.169833	0.12705	-0.758152	0.952233	0.560097	-0.509592	-0.580847	0.379043	0.0916923	NO	57	11	NLYVMTSSR	60	EVILSAGSIASPQVLMLSGIGPK	51	NWNVLLIER	45
110749179	NP_650802.1	FBgn0038700	K01285	0.328928	0.142302	0.669485	0.994237	0.0606598	0.330369	0.660759	0.812542	-0.229032	-0.590901	0.235624	1.33291	-1.19359	-0.336848	0.350488	0.431353	0.18517	NO	46	6	LDFNEYYEVVTESLR	136	LDFNEYYEVVTESLRR	69	LAHFVSSK	43
110749558	NP_724342.1	FBgn0001198	K11252	0.988051	0.300063	0.760992	0.148666	0.198976	0.549861	0.641622	0.176149	0.499356	-0.126245	0.171212	-0.234773	-0.281185	0.0417735	0.121377	-0.191516	0.291008	NO	58	4	ESYAIYIYK	63	AMSIMNSFVNDVFER	149	EIQTAVR	32
110749562	NP_724343.1	FBgn0001196	K11251	0.728289	0.16398	0.447014	0.612699	0.392549	0.452132	0.959211	0.0324883	0.189779	-0.338073	-0.0457069	0.091409	-0.135418	-0.0575518	0.851734	-0.556172	0.383149	NO	57	2	AGLQFPVGR	73	HLQLAIR	37	0	#N/A
110749568	NP_038576.1	#N/A	K11253	0.988424	0.831897	0.900059	0.0862037	0.606612	0.457444	0.0347018	0.29852	0.747606	0.342704	0.465606	-0.476986	0.125648	-0.0543107	-0.988451	-0.161818	0.146171	NO	44	4	DIQLAR	32	RVTIMPK	30	EIAQDFK	32
110749824	NP_523899.1	FBgn0001233	K04079	0.878485	0.399053	0.417739	0.742219	0.834517	0.877412	0.0199944	0.248404	0.780506	-0.234664	-0.139135	0.583416	1.28329	0.9018	-2.75804	-0.417169	0.378527	NO	14	9	SLTNDWEDHLAVK	78	ELFIK	30	HSQFIGYPIK	79
110750103	NP_648912.2	FBgn0063485	N/A	0.371786	0.843417	0.535108	0.251597	0.918012	0.229642	0.135271	0.70901	-0.158996	0.53718	0.0432664	-0.317914	0.953531	-0.500136	-0.792109	0.235177	0.681829	NO	34	2	TVYPIEELK	43	QGMLPANYVEPAQI	50	0	#N/A
110750178	NP_001034018.1	FBgn0053985	N/A	0.974727	0.404722	0.892511	0.285125	0.0224738	0.903216	0.512883	0.0590606	0.58409	-0.0813489	0.410473	-0.177564	-0.940205	0.629038	0.0149714	-0.439455	0.0760811	NO	57	1	GTPFLMK	45	0	#N/A	0	#N/A
110750189	NP_648818.3	FBgn0036548	K01529	0.723515	0.304015	0.467699	0.359668	0.190595	0.874113	0.600854	0.254882	0.213558	-0.242731	-0.0347767	-0.159003	-0.504545	0.762045	0.204321	-0.238868	0.868414	NO	35	1	FNQQLGRK	38	0	#N/A	0	#N/A
110750672	NP_001097285.1	FBgn0050045	N/A	0.398683	0.96017	0.183901	0.267534	0.805147	0.569703	0.176495	0.43224	-0.22183	1.76981	-0.888065	-0.587872	1.13721	0.232693	-1.29623	-0.14572	0.590049	NO	49	3	ALDWIAAHPSKEDQNQV	39	WSYESGNGIK	35	ALDWIAAHPSK	70
110750754	NP_523827.1	FBgn0011296	K09542	0.3671	0.844192	0.960061	0.821568	0.666032	0.166524	0.0255301	0.594707	-0.157645	0.523887	0.874875	0.446201	0.29962	-0.736118	-1.3525	0.10168	0.302763	NO	39	5	FVVVTAK	44	LLDQNFGLGLYPEQLLSPSR	50	LSSDGVLTITAPRK	58
110750766	NP_523827.1	FBgn0011296	N/A	0.848855	0.983582	0.215852	0.972923	0.44286	0.110468	0.0317024	0.692351	0.344278	0.798045	-0.288399	0.667662	-0.0724885	-0.645956	-0.961709	0.158567	0.0811793	NO	57	2	FQVILDVQQFKPDEINVK	58	NITIEQTGKPALK	70	0	#N/A
110750930	NP_730941.1	FBgn0010051	K02522	0.934334	0.325436	0.958614	0.972194	0.468237	0.00302741	0.315561	0.822252	1.91674	-0.683638	2.55135	2.4859	-0.157587	-6.2931	-1.17149	1.35182	0.0739233	NO	22	1	SVLSEKNK	40	0	#N/A	0	#N/A
110750934	NP_523411.1	#N/A	K00036	0.102413	0.235296	0.149982	0.987576	0.440946	0.27762	0.917088	0.430741	-0.251722	-0.158556	-0.228875	0.471149	-0.0447154	-0.17906	0.424522	-0.0327422	0.243418	NO	58	7	GGYFDEFGIIR	89	LGYLDDATVPSGSITPTYSLAVLK	90	EMVQNLMTLR	68
110751102	NP_523628.1	FBgn0000473	N/A	0.0333062	0.408841	0.329529	0.885372	0.3151	0.22309	0.909753	0.873854	-0.827968	-0.114405	-0.205313	0.513551	-0.300106	-0.496086	0.974664	0.455661	0.334259	NO	51	9	DINLIK	35	MQLPLK	37	TVLQSNFSK	71
110751295	NP_523524.2	FBgn0004868	K00680	0.266273	0.336831	0.921224	0.110115	0.270427	0.909514	0.272282	0.672228	-0.114715	-0.0852945	0.282147	-0.226845	-0.169208	0.407333	-0.169178	0.0757598	0.512542	NO	56	5	VPIDQQEALSSDLMGLFEK	121	YYGGESASITPLEDLFAK	148	NPEAEIKPGLDLLGSIK	37
110751310	NP_725867.1	FBgn0004003	K09586	0.403562	0.0340457	0.573923	0.562736	0.651843	0.756837	0.416526	0.717603	-0.11276	-0.999531	0.0919913	0.0714701	0.255109	0.614594	-0.164305	0.243431	0.720003	NO	45	3	SEAFPAILLFLQGK	83	FDVAFPYGEK	53	TDPILFVAEK	73
110751332	NP_476699.1	FBgn0003205	K07827	0.70588	0.455526	0.93985	0.145867	0.3787	0.310744	0.608743	0.43685	0.226319	-0.0590131	0.728572	-0.46276	-0.197846	-0.360939	0.19028	-0.0646128	0.756006	NO	35	1	LVVVGAGGVGK	80	0	#N/A	0	#N/A
110755169	NP_477213.1	FBgn0000442	K07376	0.0337157	0.314648	0.325829	0.242691	0.696877	0.928906	0.863069	0.143248	-1.22456	-0.321471	-0.290497	-0.473143	0.43269	1.46826	0.970143	-0.56142	0.337011	NO	20	7	GIEVVGIPNTINK	34	GTLGVGGFGR	47	NSFLNYLGGLDEIR	111
110755248	NP_724716.1	FBgn0033339	N/A	0.117525	0.64798	0.425181	0.784982	0.753376	0.317536	0.59261	0.33289	-0.731385	0.235535	-0.0949498	0.445805	0.647145	-0.441935	0.167203	-0.227417	0.865581	NO	18	2	IANILSR	39	DILDLLGYNVDAMNNK	86	0	#N/A
110755253	NP_610764.1	FBgn0033717	K01426	0.820492	0.314207	0.520203	0.264974	0.424445	0.406053	0.739153	0.486382	0.828031	-0.52441	0.0453222	-0.552658	-0.284324	-0.315264	0.833725	-0.0304216	0.966218	NO	18	2	GFGGWVPPVIVA	49	YAQDLSPILK	62	0	#N/A
110755317	NP_610084.1	FBgn0032913	N/A	0.0831834	0.10379	0.650858	0.753715	0.300199	0.678399	0.68203	0.974265	-1.55174	-1.80989	0.399293	0.694242	-0.828081	0.682617	0.682631	1.73093	0.361845	NO	20	2	NLLLFEDLSTK	26	DMLTFFVK	65	0	#N/A
110755382	NP_524709.1	FBgn0010198	K02957	0.844151	0.61114	0.0582364	0.658277	0.430991	0.221256	0.901626	0.287216	0.2198	0.0678533	-0.382802	0.0916626	-0.0572777	-0.255561	0.432201	-0.115877	0.554304	NO	58	3	FDVPINDIEK	72	MNVLSDALK	69	VVVNLSGR	63
110755784	NP_572568.1	FBgn0030136	K02979	0.926789	0.41219	0.7253	0.0215088	0.435786	0.302903	0.725945	0.806223	0.482526	-0.0841189	0.213054	-0.776073	-0.115971	-0.297524	0.308852	0.269256	0.327299	NO	45	4	EGDLLTLLESER	116	VEFLGEQNR	62	EGDLLTLLESEREAR	65
110755821	NP_001015158.1	#N/A	K00820	0.998824	0.430311	0.372912	0.785691	0.123396	0.147264	0.313028	0.758018	0.738615	-0.0451213	-0.0835648	0.191042	-0.409882	-0.373346	-0.172752	0.155007	0.117344	NO	58	17	VLQLDSK	42	NLDNLIRK	50	DYIPEIK	46
110756003	NP_650283.1	FBgn0038145	K09502	0.714714	0.313841	0.750667	0.993865	0.106562	0.364773	0.411644	0.294634	0.14225	-0.135608	0.179173	0.625998	-0.484445	-0.127228	-0.0830422	-0.117098	0.290468	NO	47	3	DIFDMFFGGGLGGR	105	DLVITSYPGTVVK	74	GQDVIHQLSVSLEELYK	76
110756011	NP_001097538.1	#N/A	K10380	0.604094	0.560561	0.0355575	0.31568	0.3165	0.421895	0.853275	0.84337	0.221901	0.141208	-1.66828	-0.35532	-0.456024	-0.248042	1.50629	0.858262	0.643448	NO	22	4	ILELGPVGAK	48	VAVSPIVTVEPR	45	ELGDVMADFLEHK	81
110756016	NP_001027191.1	FBgn0038570	K11187	0.00340509	0.755901	0.796823	0.0325452	0.126728	0.976247	0.521232	0.119603	-1.71763	0.493019	0.708446	-1.21653	-1.02985	3.48299	0.0461024	-0.76656	0.0642965	NO	14	2	IPTIDLFEDSPTNK	81	MLADPAAQFTDALELSVDLPVLGGK	94	0	#N/A
110756123	NP_477354.1	FBgn0024352	K09553	0.773294	0.852462	0.430585	0.939293	0.232395	0.0571297	0.457491	0.714218	0.158962	0.253811	-0.0408171	0.36053	-0.241807	-0.571421	-0.03535	0.116093	0.51829	NO	53	5	LAAFDLGLK	77	LILEQMQSDPR	70	ILQGMQQQGK	59
110756153	NP_573193.1	FBgn0065032	K05756	0.834221	0.548749	0.480276	0.0707669	0.538821	0.972629	0.0419643	0.306366	0.658538	0.0960888	-0.0294319	-0.899952	0.140954	1.9659	-1.55661	-0.375486	0.339349	NO	19	1	DLDIIDEALYFFK	114	0	#N/A	0	#N/A
110756178	NP_651052.1	FBgn0038974	K01175	0.404017	0.319749	0.530759	0.0179181	0.694638	0.919191	0.649579	0.250151	-0.18745	-0.353393	0.0675232	-1.57069	0.53353	1.56308	0.410656	-0.463249	0.452158	NO	20	4	FTIVAWDPPGYGK	60	ISFDWLESILR	43	VYGEEYLRK	28
110756506	NP_608586.2	FBgn0031322	K09511	0.458188	0.628523	0.763862	0.83003	0.767976	0.357092	0.238782	0.0675474	-0.0363052	0.111826	0.230141	0.272297	0.40675	-0.155753	-0.360173	-0.468783	0.741152	NO	26	2	DILYDTLPN	47	INLNLTR	27	0	#N/A
110756545	NP_001014545.2	#N/A	N/A	0.605818	0.574902	0.597017	0.420391	0.500475	0.173368	0.197638	0.989025	0.531147	0.385252	0.480516	-0.390026	0.00282906	-2.63311	-2.15447	3.77786	0.472514	NO	22	1	DIIFTNLK	31	0	#N/A	0	#N/A
110756571	NP_611685.1	FBgn0034743	K02960	0.925038	0.853509	0.213343	0.500387	0.0595493	0.186237	0.817369	0.751709	0.327229	0.265	-0.200155	0.000226818	-0.543608	-0.310497	0.315842	0.145963	0.422071	NO	58	6	LQEPILLLGK	75	FSGVDIR	27	VNGGGHVAQIYAIR	45
110756584	NP_725564.1	FBgn0020611	K02148	0.2946	0.256194	0.904011	0.0632096	0.754202	0.792415	0.791709	0.0123433	-0.123651	-0.167875	0.336538	-0.367941	0.243496	0.290158	0.29044	-0.501166	0.173422	NO	58	11	QVGQIDADLK	63	VGTLDQLVGLSDDLGK	157	ANFQDWYSGYEK	72
110756609	NP_608637.1	FBgn0031381	N/A	0.852328	0.87386	0.0748158	0.718273	0.512616	0.344407	0.0226935	0.993302	0.519101	0.634745	-0.802651	0.296915	0.0240133	-0.30599	-1.56386	1.19772	0.0672162	NO	58	4	GTNVEANVDFK	113	ILGCDTLPCNLVR	88	TLRPVVDVDLGNSHMQYPLPEQNACK	47
110756725	NP_524315.2	FBgn0086472	K02975	0.822906	0.596653	0.690376	0.225901	0.0419125	0.239858	0.911459	0.770675	0.217893	0.0639717	0.130164	-0.183757	-0.632074	-0.256618	0.494801	0.165619	0.493615	NO	58	3	ALIELQQK	60	LITPSIVSER	82	LNNQVLFDK	86
110756783	NP_650064.1	FBgn0037891	K00658	0.410458	0.827017	0.0974513	0.67711	0.72288	0.785606	0.465683	0.0252168	-0.0542126	0.255021	-0.350804	0.114863	0.22248	0.298314	-0.0326351	-0.453027	0.418397	NO	58	7	EAVMFLRK	32	NFAEIEIALAALSDK	95	EVVVPPFAESVSEGDVR	66
110756925	NP_523601.2	FBgn0041789	K05760	0.718568	0.864933	0.0209226	0.0661085	0.687578	0.566676	0.744416	0.259443	0.704872	1.0491	-1.96843	-1.68133	0.534755	0.296842	1.55207	-0.487884	0.281295	NO	14	2	ELDDLMASLSEFK	73	EDYFDMFAPK	87	0	#N/A
110757116	NP_648505.1	FBgn0036204	K10836	0.979141	0.292799	0.0981786	0.547052	0.1655	0.535335	0.841404	0.224927	0.863521	-0.247435	-0.61431	0.0591702	-0.548918	0.104551	0.678305	-0.294885	0.254703	NO	31	1	YMDAFNLVSK	75	0	#N/A	0	#N/A
110757127	NP_609354.1	FBgn0032192	K01204	0.448039	0.778833	0.497718	0.739683	0.00204994	0.654539	0.612486	0.94704	-0.0687448	0.507522	-0.00340098	0.368549	-2.25328	0.327542	0.289427	0.832386	0.160557	NO	37	3	VNPSGVVILR	48	NLANYIHSK	27	IIAVDQDPLGIQGR	129
110757182	NP_573303.1	FBgn0030932	K00681	0.494111	0.62448	0.715548	0.239678	0.0248426	0.922381	0.771288	0.377122	-0.00446516	0.107178	0.171748	-0.233465	-0.914595	0.652681	0.303677	-0.082758	0.488114	NO	34	1	LVIGAAGGTK	66	0	#N/A	0	#N/A
110757574	NP_611087.1	FBgn0027091	K01883	0.98884	0.737886	0.715687	0.902855	0.343144	0.0820217	0.201556	0.752811	1.18121	0.398034	0.38478	0.875579	-0.293235	-2.03843	-0.932742	0.424802	0.329155	NO	14	1	QNYLYEK	42	0	#N/A	0	#N/A
110757630	NP_572577.1	FBgn0030148	K00945	0.804821	0.611608	0.196131	0.96192	0.34104	0.0931319	0.774735	0.105837	1.76545	0.576036	-2.0316	4.77796	-1.23506	-3.62658	2.0904	-2.31661	0.346146	NO	19	2	YGELIENYIK	70	MNLNEILQMHK	32	0	#N/A
110757658	NP_609118.1	FBgn0031912	K00627	0.565783	0.208766	0.394515	0.396815	0.648381	0.516756	0.750322	0.352553	0.0737006	-0.39265	-0.1281	-0.119112	0.253126	0.0342464	0.441247	-0.162457	0.985216	NO	39	4	IIVGEGIQDIK	68	SILDISK	33	AIDEDQAADFLAVLK	83
110757826	NP_648821.1	FBgn0036551	K01092	0.331174	0.17404	0.598328	0.27948	0.529115	0.620039	0.456375	0.949064	-0.3502	-0.933384	0.217541	-0.539789	0.0858113	0.374342	-0.141201	1.28688	0.758829	NO	32	6	GAFLNDKPIK	30	LTHDAAHILK	50	IEDLIIGQLK	83
110757828	NP_648821.1	FBgn0036551	K01092	0.0512014	0.432618	0.17427	0.934095	0.775435	0.108508	0.773406	0.88058	-0.845431	-0.101229	-0.559781	0.820898	0.580702	-1.08077	0.60449	0.581123	0.245459	NO	43	5	GQGAYLNDKPIK	37	FEALIHSVR	40	IIEFK	29
110757951	NP_476857.1	FBgn0004636	K07974	0.900974	0.654654	0.55453	0.474186	0.207261	0.788629	0.0454406	0.8435	0.390415	0.139592	0.0447967	-0.0218907	-0.350143	0.387673	-0.87527	0.284827	0.559051	NO	46	1	IVVLGSGGVGK	63	0	#N/A	0	#N/A
110757964	NP_995988.1	FBgn0004167	K06115	0.971002	0.731575	0.964877	0.506528	0.38176	0.143428	0.189213	0.125379	0.422633	0.152225	0.451499	0.00379851	-0.102898	-0.366919	-0.316737	-0.243601	0.266507	NO	57	19	GLQGALSTYR	88	DLSSVANLLK	78	DLMSWINEMVAK	67
110757985	NP_725591.1	FBgn0034138	K02958	0.839187	0.108467	0.209154	0.515912	0.689959	0.604559	0.285365	0.834222	0.386847	-0.601914	-0.349572	0.0168052	0.385264	0.161495	-0.382161	0.383236	0.682393	NO	32	3	NMIIVPEMVGSIVGVYNGK	88	SMALVK	36	GVDLDQLLDMPNEQLMVLMHAR	29
110758110	NP_523718.1	FBgn0004435	K04634	0.515043	0.568931	0.32538	0.0219951	0.708306	0.931505	0.68716	0.00709734	0.0202302	0.14389	-0.308949	-1.47253	0.458115	1.89253	0.866364	-1.59965	0.145252	NO	17	2	APTTGIIEYPFDLDSIIFR	61	LLLLGTGESGK	79	0	#N/A
110758129	NP_731826.1	FBgn0086897	K03102	0.932625	0.927056	0.206981	0.139541	0.495793	0.255119	0.184208	0.848484	0.480925	0.480163	-0.236769	-0.321017	-0.00465853	-0.273063	-0.374113	0.248532	0.387309	NO	30	3	IFVGGLSTELSDDDIK	140	LFVGGLSWETTDK	49	IMAAGDHVINNK	72
110758163	NP_525082.2	FBgn0011661	N/A	0.651697	0.281882	0.423861	0.180298	0.259546	0.722935	0.508161	0.924028	0.141631	-0.23561	-0.0824718	-0.390522	-0.331389	0.380101	0.0121958	0.506065	0.80324	NO	36	1	QLFDQVVK	67	0	#N/A	0	#N/A
110758189	NP_524261.1	FBgn0015575	K01044	0.0255292	0.480873	0.168492	0.288667	0.833389	0.756999	0.73142	0.596427	-0.610898	-0.0163227	-0.326272	-0.176942	0.44645	0.322569	0.290142	0.0712734	0.543613	NO	57	16	HISGASHVDDIAYLLYLPK	74	EIPFAAPPIGDLR	77	AQASVLTR	60
110758250	NP_651674.3	FBgn0039640	K11140	0.848589	0.38651	0.788095	0.697932	0.222416	0.0276079	0.316766	0.997385	0.307773	-0.095469	0.265972	0.16033	-0.348365	-0.893858	-0.218778	0.822395	0.101283	NO	58	11	FSGLDQYHK	42	AAIVDDLLNLAR	125	TVIPSSYEILLMPELK	124
110758252	NP_651674.3	FBgn0039640	K11140	0.764556	0.558801	0.334769	0.764731	0.0383993	0.210829	0.627092	0.991512	0.179417	0.0409496	-0.11839	0.186705	-0.684942	-0.309007	0.124616	0.580651	0.25471	NO	58	18	YELLWAK	41	SLGIPYQLPK	69	QYDVATPEDLFEAFK	101
110758254	NP_733277.1	FBgn0039640	K11140	0.754334	0.388979	0.502244	0.956557	0.211507	0.0858606	0.503146	0.878659	0.26665	-0.121681	0.00239374	0.706038	-0.466516	-0.827322	0.00486115	0.435576	0.514357	NO	55	4	GYVDNALR	56	VFTNELYAK	57	YVELVNLLEEK	95
110758256	NP_650722.1	FBgn0028670	K02154	0.934138	0.00281425	0.553632	0.489697	0.221986	0.626413	0.761234	0.878174	0.683117	-1.46202	0.0574538	-0.0121619	-0.490504	0.205934	0.557542	0.460636	0.101261	NO	40	5	DGVPIVDNLTELPR	89	SILDAEDSED	47	ELPNWAIMVR	55
110758613	NP_725106.1	FBgn0023167	K11088	0.947267	0.592995	0.723317	0.600297	0.187882	0.410724	0.219985	0.745856	1.00019	0.157799	0.403218	0.150978	-0.900075	-0.180054	-1.00583	0.373773	0.773993	NO	34	1	FLILPDMLK	54	0	#N/A	0	#N/A
110758628	NP_651323.3	FBgn0045866	N/A	0.496471	0.590273	0.635992	0.194842	0.428086	0.77643	0.440142	0.31412	-0.0151113	0.309532	0.493866	-2.05026	-0.340366	2.60955	-0.371892	-0.63532	0.968459	NO	14	2	QEIYLITK	44	RLEDLSEAIVQDFAR	61	0	#N/A
110758758	NP_524634.2	FBgn0087002	N/A	0.936325	0.0530956	0.645417	0.577075	0.50435	0.791434	0.318276	0.209254	0.926171	-1.13142	0.240439	0.122832	0.00936489	0.730255	-0.439218	-0.458426	0.492619	NO	45	26	ISIVANVQR	31	SIIFESPQPVLR	38	ALGNSQFLDDATLQK	72
110758819	NP_477408.1	#N/A	K10418	0.504542	0.768943	0.940696	0.0698763	0.501148	0.595114	0.221671	0.409705	0.0139805	1.2964	2.64994	-2.35315	0.00568829	1.01199	-2.30984	-0.315002	0.570727	NO	18	2	DIAAFIK	44	DIAAFIKK	50	0	#N/A
110759191	NP_724007.1	FBgn0086783	K10352	0.420743	0.531671	0.945908	0.085185	0.75813	0.690039	0.439892	0.02815	-0.0427847	0.0188591	0.387293	-0.307547	0.227901	0.162435	-0.0494638	-0.396692	0.335568	NO	58	60	TLLEQADR	56	ITAAVMHMGGMK	46	ELSSLTAK	55
110759197	NP_477154.1	FBgn0000406	N/A	0.335393	0.0581525	0.735947	0.53532	0.856383	0.27569	0.582907	0.823508	-0.349291	-1.30663	0.543806	0.0630946	0.959499	-0.789792	0.258258	0.621054	0.604764	NO	27	2	FTQWELVK	38	IENNLYDLEGFAK	97	0	#N/A
110759210	NP_649168.2	FBgn0036927	K00823	0.011352	0.408469	0.945085	0.416564	0.771993	0.705974	0.424214	0.214627	-0.81888	-0.0998287	0.621088	-0.0784396	0.422254	0.302661	-0.100548	-0.248305	0.268447	NO	35	6	HADIFLDR	45	VTTVGDYILK	66	IDIPAFDWPTASFPAYK	60
110759392	NP_731970.1	FBgn0038294	N/A	0.278641	0.154883	0.307093	0.0192997	0.487572	0.992458	0.71675	0.732185	-0.281207	-0.543659	-0.254922	-1.42155	-0.0213452	1.63622	0.627795	0.258671	0.122997	NO	21	5	STPFYLR	29	SDYPELHSTSWPFGK	42	DSYLSPVK	39
110759540	NP_609361.1	FBgn0032198	K03232	0.842028	0.90466	0.938066	0.848793	0.01371	0.0479275	0.587277	0.710801	0.193719	0.285427	0.335454	0.207768	-0.681454	-0.509487	0.0670971	0.101476	0.131055	NO	58	1	DILDSSVFQELK	102	0	#N/A	0	#N/A
110759542	NP_608907.1	FBgn0031682	K09680	0.626194	0.034807	0.574955	0.331868	0.694576	0.858053	0.319346	0.621093	0.173918	-1.12793	0.105645	-0.242074	0.408038	0.943072	-0.414505	0.153835	0.627603	NO	50	4	EFDFPDPYLFQK	81	GFDELLQLAER	106	NISYEAFEFER	34
110759569	NP_525081.1	FBgn0041629	K12373	0.165011	0.451543	0.00603086	0.955779	0.115789	0.811351	0.825456	0.900704	-0.260592	-0.0359379	-0.767287	0.478164	-0.48602	0.360283	0.382027	0.329361	0.0818558	NO	58	10	GLETFSQLLIPTGDGSNLK	115	LGPMNPTNPALYEFLR	116	SNPEINSYMK	69
110759577	NP_610294.1	FBgn0033189	N/A	0.00884266	0.246086	0.341193	0.96244	0.646168	0.473218	0.642897	0.773433	-0.756776	-0.244982	-0.142262	0.596221	0.181526	-0.0338897	0.178843	0.22132	0.225156	NO	57	2	YQVGELVESEK	79	TLIILHDK	61	0	#N/A
110759694	NP_477009.1	FBgn0011589	N/A	0.0455416	0.689775	0.943548	0.492128	0.179685	0.414743	0.724537	0.661984	-0.831856	0.280328	0.831403	-0.00986408	-0.734666	-0.16309	0.436402	0.191344	0.46401	NO	49	3	YITDVITK	51	LLTDLTPEQLISTIDFR	132	DSSNLIQII	40
110759728	NP_724560.1	FBgn0010548	K00128	0.943143	0.842054	0.63263	0.629742	0.357054	0.288921	0.00827108	0.965371	0.584223	0.408694	0.137774	0.125578	-0.203781	-0.312084	-1.38262	0.642214	0.158175	NO	58	6	FLTPITLELGGK	89	YISPTILVDIK	62	NVFINGK	30
110759996	NP_476667.1	FBgn0003031	N/A	0.886395	0.94255	0.648313	0.863493	0.36034	0.0186646	0.263198	0.621249	0.246736	0.362784	0.0865034	0.23648	-0.112504	-0.671903	-0.208389	0.0602921	0.306909	NO	57	7	SGVGNVFIK	71	GFGFVAFEDPDAAEQAVLELNGK	118	YQGVNLYVK	49
110760009	NP_730974.1	FBgn0051548	N/A	0.300791	0.966824	0.10253	0.942016	0.502726	0.0816491	0.267001	0.925934	-0.120679	0.481004	-0.331269	0.360079	0.0026383	-0.486662	-0.241542	0.33643	0.128706	NO	44	6	ILDLKR	28	SAIDQFTR	49	VNAVNPGVITTNLHR	87
110760127	NP_649220.1	FBgn0036985	N/A	0.91188	0.43419	0.374618	0.897183	0.09652	0.0416714	0.810952	0.888526	1.00801	-0.134745	-0.254025	0.979065	-1.54007	-1.86776	0.96114	0.848387	0.281647	NO	49	1	VVVFAVPK	66	0	#N/A	0	#N/A
110760210	NP_477194.1	FBgn0016119	K02131	0.0847773	0.418715	0.510571	0.563127	0.984053	0.474541	0.231097	0.374054	-0.822576	-0.190674	0.02824	0.115213	2.23859	-0.090824	-1.04699	-0.230972	0.41672	NO	15	4	FQEPVVEQ	43	WLRLR	26	GDPTEFPK	46
110760259	NP_730212.1	FBgn0036672	N/A	0.710307	0.831501	0.836243	0.0694583	0.639287	0.405032	0.311249	0.268872	0.171204	0.333122	0.339573	-0.480349	0.170517	-0.115371	-0.237702	-0.180994	0.717264	NO	58	4	IITSGGVTYK	96	IIGIDSK	37	VSLVDK	26
110760290	NP_001027420.2	#N/A	N/A	0.228492	0.693305	0.159745	0.145117	0.746451	0.660493	0.685911	0.539815	-0.504926	0.373322	-0.843426	-0.958454	0.699091	0.553225	0.613576	0.0675931	0.820261	NO	18	2	DFGTPLVVQK	62	GILNQATGPGSR	88	0	#N/A
110760320	NP_996031.1	FBgn0085484	K00868	0.342316	0.816697	0.16441	0.800906	0.726838	0.245947	0.614001	0.217238	-0.0725115	0.18241	-0.193426	0.158111	0.165674	-0.189388	0.0801914	-0.13106	0.766434	NO	57	6	LYVPETLEEIYRK	73	IAEVVR	26	LTTIISTNK	70
110760433	NP_611659.2	FBgn0034716	N/A	0.600041	0.0892707	0.203304	0.169215	0.964144	0.409884	0.400581	0.478103	0.301773	-1.64028	-0.779817	-0.901563	3.66275	-0.304663	-0.285771	-0.0524275	0.588683	NO	19	1	DIPEEPGETL	51	0	#N/A	0	#N/A
110760574	NP_611062.1	FBgn0034047	N/A	0.986999	0.422948	0.606305	0.0439819	0.372109	NA	0.495466	0.347206	2.36139	-0.236423	0.28556	-1.59421	-0.389097	NA	-0.0197123	-0.407505	0.245865	NO	17	4	NYNLFSK	32	NLSNDEVFNAINK	97	IFISLEDDEIR	57
110760680	NP_722583.1	FBgn0002121	K06094	0.258802	0.483638	0.754673	0.338283	0.369072	0.526658	0.839669	0.249477	-0.30091	-0.0214583	0.373887	-0.211015	-0.272716	0.0452656	0.674716	-0.28777	0.923699	NO	37	5	EDINGISSLTFTK	64	VIDFFTVFSK	67	VVIASEEQFK	74
110760701	NP_523396.1	FBgn0021765	K08683	0.0556203	0.106698	0.74183	0.604162	0.660446	0.593462	0.511159	0.841705	-0.184728	-0.161566	0.0834689	0.0315463	0.0743585	0.0425129	0.00506968	0.109338	0.592154	NO	58	9	DMPHELTDFNK	61	AAIVGMTLPLAR	103	VYNFNK	30
110760845	NP_651151.1	FBgn0039084	N/A	0.539455	0.313375	0.11894	0.917847	0.783482	0.242067	0.549157	0.552174	0.0335482	-0.19073	-0.425072	0.472209	0.358205	-0.348432	0.0617064	0.0385649	0.755875	NO	43	4	TDTYNYLR	40	GIHDVINIQMEK	30	FTYDSEMSLLR	87
110761019	NP_788668.1	FBgn0004587	N/A	0.655237	0.660654	0.842893	0.104415	0.302669	0.0600152	0.649343	0.957765	0.213033	0.235176	0.553676	-0.7601	-0.291646	-1.14604	0.36993	0.825971	0.351526	NO	22	2	LTVENLSSR	36	VYVGGLPYGTR	53	0	#N/A
110761103	NP_726938.1	FBgn0022942	N/A	0.874978	0.0362889	0.3184	0.72004	0.674668	0.0483354	0.575988	0.994641	0.269831	-0.478656	-0.121432	0.139434	0.167858	-0.65291	0.0719418	0.603933	0.0766056	NO	55	1	IEIFLNK	41	0	#N/A	0	#N/A
110761214	NP_652000.1	FBgn0029176	K03233	0.846144	0.612341	0.270909	0.75275	0.166271	0.264136	0.407042	0.939832	0.159192	0.0497051	-0.106248	0.110706	-0.23498	-0.153016	-0.0572872	0.231928	0.665075	NO	58	7	YITESNAIAYYVANDQLK	55	GNFDLDDFK	56	FDPEHYSIWLGEYK	80
110761292	NP_609215.3	FBgn0032026	K10835	0.822689	0.461501	0.2803	0.386631	0.889287	0.267868	0.261386	0.176415	1.39448	-0.141522	-0.67009	-0.341442	2.66697	-1.12212	-0.882354	-0.903927	0.818768	NO	14	8	FFNTNTSGR	28	LASMGMDFGR	46	MFQSLSQAR	64
110761364	NP_477484.2	FBgn0000667	K05699	0.312722	0.668278	0.931089	0.151957	0.500927	0.781132	0.375816	0.0926396	-0.112585	0.111559	0.378511	-0.244875	0.000821726	0.26719	-0.112991	-0.287631	0.585488	NO	54	16	LASDLLEWIR	89	GITQEQLNEFR	80	IDVLHLEFAK	49
110761561	NP_731739.1	FBgn0002719	K00029	0.0393761	0.989987	0.208799	0.937696	0.699517	0.225805	0.354554	0.271862	-1.09974	1.58405	-0.552845	1.00529	0.529442	-0.736659	-0.369051	-0.360487	0.0978943	NO	40	6	IIPENTFLIAAK	66	AQLYDTTYKPSIPPIYNWPNL	39	GMAFSLQER	52
110761835	NP_652031.2	FBgn0010590	K02738	0.269946	0.963448	0.490896	0.651619	0.474425	0.059784	0.481113	0.872791	-0.239596	0.825491	-0.0117609	0.17524	-0.0407819	-1.1814	-0.0294772	0.502291	0.432458	NO	17	1	VILGNELPR	58	0	#N/A	0	#N/A
110762076	NP_608711.3	FBgn0031459	N/A	0.405171	0.392882	0.359862	0.70375	0.984208	0.330005	0.0422513	0.781955	-0.115399	-0.154794	-0.190027	0.269707	1.48761	-0.363137	-1.34632	0.41236	0.338097	NO	32	2	AQVAVPTGDTIFGK	88	AEDADEALLGHLMLIAR	83	0	#N/A
110762211	NP_572988.1	FBgn0027601	N/A	0.0151424	0.0945819	0.130461	0.75478	0.405998	0.823521	0.790114	0.949943	-0.653465	-0.502268	-0.356632	0.217334	-0.106182	0.492195	0.435447	0.473571	0.11627	NO	42	6	GGVTFVDSIPK	91	GVMLTHK	30	GFQVPPAELEALIK	58
110762387	NP_523628.1	FBgn0000473	K00517	0.204968	0.607014	0.0311097	0.863341	0.143202	0.543553	0.670746	0.988955	-0.24385	0.0890186	-0.623641	0.341526	-0.482051	0.0508475	0.200408	0.667742	0.15105	NO	57	8	LSPIFTSGK	48	VLAINNPDLIK	89	VLDMIK	51
110762620	NP_727132.1	FBgn0052743	N/A	0.455598	0.878609	0.576549	0.418661	0.197771	0.50517	0.170733	0.946488	-0.0253647	0.297688	0.0489755	-0.0485398	-0.296328	0.00453484	-0.334797	0.353831	0.6646	NO	58	10	ENTPEALEFALNIWKK	36	ENTPEALEFALNIWK	69	YLIFADVIYELEEK	51
110762648	NP_610914.2	FBgn0033883	K07512	0.359169	0.0149265	0.641613	0.879121	0.686165	0.112601	0.890676	0.597837	-0.0934643	-0.636326	0.103864	0.327985	0.191682	-0.484775	0.528659	0.062375	0.319268	NO	55	4	YILDMTKL	33	ELGALFK	43	TYANYTSEELMK	66
110762773	NP_476792.1	FBgn0004034	N/A	0.199984	0.80421	0.883267	0.0176355	0.806955	0.582069	0.492298	0.255896	-0.403119	0.450538	0.608568	-1.08845	0.578992	0.145025	-0.0162109	-0.275341	0.337248	NO	41	4	MSPLSLEVK	73	MYLTIPR	28	MWVLDSGK	55
110762813	NP_477134.1	FBgn0015288	K02891	0.694462	0.464745	0.550776	0.80951	0.102587	0.176892	0.630274	0.992807	0.265319	-0.0552974	0.0693676	0.497947	-1.39976	-0.633529	0.22334	1.03261	0.275231	NO	18	2	LSVNSDIDFSK	71	TNNFGNSVTLER	69	0	#N/A
110762823	NP_649858.1	FBgn0026380	K02735	0.798539	0.732214	0.966752	0.0278508	0.442638	0.0374411	0.878756	0.456731	0.283309	0.239685	0.700763	-0.75321	-0.0735526	-1.0773	0.718068	-0.037759	0.128085	NO	41	1	LNLYELK	46	0	#N/A	0	#N/A
110762877	NP_725832.2	FBgn0010551	N/A	0.738398	0.433154	0.419194	0.452992	0.152942	0.639072	0.971554	0.0179011	0.126733	-0.0375371	-0.0463091	-0.0248784	-0.333204	0.110751	0.60813	-0.403686	0.22402	NO	57	10	MLGLALSQNPGYLK	86	AIIFSR	28	AAFFVEK	60
110763051	NP_523957.1	FBgn0011640	N/A	0.188485	0.259676	0.821971	0.456282	0.267876	0.2571	0.914509	0.488893	-0.165787	-0.138506	0.176985	-0.0210535	-0.160279	-0.178651	0.492088	-0.00479696	0.747509	NO	40	2	IFIGNLADK	54	IFVGNLTDNTK	94	0	#N/A
110763187	NP_476631.1	FBgn0002607	K02885	0.338564	0.747188	0.643356	0.421481	0.184786	0.367578	0.847885	0.357818	-0.281248	0.558756	0.300206	-0.143739	-1.00855	-0.449978	1.26093	-0.236377	0.917916	NO	21	2	DLWIQR	36	VWLDPNEINEIANTNSR	58	0	#N/A
110763326	NP_477510.1	FBgn0040309	N/A	0.689989	0.580983	0.238703	0.651404	0.75225	0.640003	0.215971	0.224232	0.122345	0.0566906	-0.196747	0.100061	0.26407	0.138758	-0.307462	-0.177716	0.928895	NO	58	4	QLSINDLPVGR	74	SVDETLR	51	AFQFVEK	52
110763383	NP_648881.1	FBgn0036616	N/A	0.240215	0.947038	0.678114	0.335757	0.832793	0.0554246	0.472496	0.504128	-0.239198	0.616703	0.158021	-0.15499	0.469801	-0.814363	-0.0393086	0.00333527	0.525632	NO	37	4	LTPSSPSGAQSGSFLQSFK	48	SFLDELGK	60	LITLSQSDK	66
110763414	NP_572282.1	FBgn0029827	K09636	0.230401	0.700914	0.188919	0.551034	0.327779	0.873261	0.312717	0.757803	-0.433297	0.33859	-0.55887	0.0763754	-0.381415	0.986846	-0.416388	0.388158	0.84197	NO	46	4	NVQIQPWMITIVAGELR	62	QFPYQVSLR	44	LWQPTSTGQR	54
110763581	NP_650695.1	FBgn0038586	N/A	0.0255301	0.19811	0.853599	0.201856	0.690606	0.582806	0.89718	0.249145	-1.08009	-0.437856	0.54757	-0.412879	0.430677	0.17477	1.09531	-0.317493	0.354084	NO	25	1	ILDTLK	30	0	#N/A	0	#N/A
110763684	NP_649069.2	FBgn0036824	K09478	0.0134151	0.0313676	0.188195	0.948693	0.808068	0.386131	0.907228	0.852256	-1.41244	-1.37131	-0.592715	1.06108	0.778552	-0.283932	1.2017	0.619066	0.0772821	NO	41	3	LFENGLMGIEIPEK	82	LLVYNAAR	44	YAAGFLNEGR	53
110763714	NP_001014492.1	FBgn0053511	N/A	0.00346259	0.817425	0.350588	0.965969	0.801995	0.18033	0.736047	0.184942	-1.31031	0.497173	-0.215131	0.965139	0.556797	-0.575027	0.44716	-0.365801	0.0874089	NO	28	3	DWIGEWVPR	71	DLWSNNIMFK	56	VIATLHSR	57
110763730	NP_524326.1	FBgn0001149	K00799	0.00823707	0.113932	0.666476	0.473232	0.697494	0.808439	0.692491	0.70388	-0.692891	-0.378252	0.134448	-0.0195737	0.220679	0.375887	0.216162	0.143541	0.325896	NO	58	9	INPQHTIPTIDDNGFR	70	QVNLMNGEHLKPEFLK	52	YENIGTALSFLDK	109
110763770	NP_523931.1	FBgn0010747	K03106	0.491204	0.823017	0.852802	0.828911	0.577709	0.242553	0.272	0.0317076	-0.0130824	0.684628	0.772893	0.554584	0.154965	-0.676399	-0.532752	-0.944837	0.456233	NO	22	1	LLGMGDIEGLIDK	97	0	#N/A	0	#N/A
110763826	NP_476676.1	FBgn0250906	K00927	0.0191571	0.653354	0.132632	0.833432	0.955557	0.243335	0.493654	0.658815	-0.321942	0.066489	-0.189416	0.153593	0.3972	-0.161687	-0.00368485	0.0594478	0.237133	NO	58	15	TIVWNGPAGVFEFENFSK	65	IGNSLFDEEGAK	74	IVAALDTIK	73
110763897	NP_611403.1	FBgn0034426	N/A	0.311871	0.796709	0.429375	0.380955	0.835575	0.827567	0.111578	0.130985	-0.587927	0.889324	-0.22675	-0.428142	1.57588	1.56264	-1.78812	-0.996906	0.672961	NO	18	4	EGEIIFPLKPAGPPK	45	GNQLFPEIK	51	YFIEDEPISNSLNGINDPDYVETFK	121
110764063	NP_651782.1	FBgn0039757	K02993	0.924113	0.745529	0.193772	0.965264	0.0803742	0.100375	0.286246	0.977986	0.226697	0.11611	-0.151983	0.300832	-0.344216	-0.314624	-0.138604	0.305787	0.105578	NO	58	8	SGGAEPDAFEASISQALLELEMNSDLK	117	DVTFEFPETYV	78	ELYITK	39
110764071	NP_650523.1	FBgn0038400	N/A	0.0916607	0.886829	0.104187	0.470308	0.805238	0.357821	0.725992	0.362863	-0.514672	0.535939	-0.578292	-0.0336324	0.545224	-0.222765	0.378786	-0.110586	0.545328	NO	30	5	DISSSLESLK	66	MLVQFFEQK	52	EISFNEFPLVK	70
110764207	NP_651304.2	FBgn0039240	K01303	0.0494693	0.516283	0.224017	0.97253	0.178899	0.389554	0.853223	0.755234	-0.436563	0.0122413	-0.217687	0.575864	-0.400495	-0.160337	0.453159	0.173818	0.272631	NO	45	6	IITEIQNDK	51	ILYIAEK	39	YSWLNPDK	34
110764472	NP_572477.1	FBgn0030038	K01372	0.556568	0.446394	0.589647	0.498701	0.0795941	0.0942588	0.788933	0.997494	0.0700456	-0.0748775	0.13384	-0.00169544	-1.20604	-0.960141	0.653037	1.38583	0.161676	NO	45	5	LTLYNNQPPELLMK	118	MNTILK	32	VASGILTSEILNQLR	132
110764492	NP_572414.1	FBgn0029969	K00626	0.099672	0.698643	0.93231	0.142388	0.397585	0.841333	0.423116	0.235438	-0.700238	0.387605	0.827256	-0.569616	-0.201689	0.762765	-0.15311	-0.352973	0.495019	NO	25	5	QATLFAGLSK	49	TPMGSFLGELSDLSAPK	148	IIAFQDTAIEPIDFSIAPSFSISK	25
110764579	NP_651963.1	FBgn0029118	K01900	0.626328	0.727658	0.170398	0.905011	0.0108287	0.540259	0.570421	0.922508	0.146559	0.323824	-0.543692	0.774414	-1.56046	0.0704894	0.155678	0.633186	0.235	NO	26	2	AVIDVVK	62	TIPLDIYYGIDDEIAK	46	0	#N/A
110764763	NP_727905.1	FBgn0014391	K02135	0.869924	0.107619	0.344319	0.260764	0.678618	0.950473	0.421679	0.00100225	0.506926	-0.585072	-0.174106	-0.323375	0.279383	1.63107	-0.128126	-1.2067	0.0657753	NO	32	1	QAGLNYINYSQIAAK	121	0	#N/A	0	#N/A
110764924	NP_727670.1	FBgn0052645	N/A	0.547472	0.166318	0.617177	0.711188	0.587926	0.297949	0.959585	0.0300654	0.0342532	-0.314214	0.0948411	0.15889	0.0912545	-0.299399	0.783337	-0.548962	0.362871	NO	44	1	GIVAGSLK	52	0	#N/A	0	#N/A
110765073	NP_650098.1	FBgn0037926	K11373	0.990935	0.761538	0.0862746	0.91517	0.462598	0.38941	0.0110201	0.844688	0.638741	0.218131	-0.430418	0.441362	-0.0433461	-0.14544	-0.951995	0.272966	0.0523364	NO	32	1	LLIIEK	35	0	#N/A	0	#N/A
110765224	NP_477042.1	FBgn0000319	K04646	0.988518	0.984663	0.316272	0.739434	0.108155	0.0695305	0.517921	0.144616	0.672607	0.730517	-0.153356	0.178714	-0.551367	-0.59932	0.0262179	-0.304013	0.059961	NO	34	3	ALIDLFESFK	84	AFMTADLPNELIELLEK	137	LADLEEFISGPNHADIQK	60
110765226	NP_523764.1	FBgn0003274	K02943	0.899413	0.955468	0.867556	0.776095	0.0397161	0.148699	0.0314237	0.983928	0.201795	0.302572	0.196604	0.12408	-0.43243	-0.255342	-0.463678	0.326399	0.0545224	NO	58	4	VIAELNGK	48	LLSMPVGGGVAVSADAAPVGGTTAPAEEK	58	ILSSVGIETDGEK	92
110765839	NP_651668.1	FBgn0039635	K00162	0.137816	0.0595249	0.827656	0.0847867	0.954975	0.738708	0.657118	0.126857	-0.258459	-0.418413	0.250709	-0.340731	0.635718	0.236992	0.151021	-0.256836	0.228211	NO	58	1	DFIIPIGK	53	0	#N/A	0	#N/A
110765842	NP_572905.1	FBgn0030503	N/A	0.213663	0.49189	0.00573018	0.808597	0.763926	0.629259	0.405181	0.963929	-0.324784	-0.00888363	-1.14336	0.355092	0.419161	0.187918	-0.157312	0.672165	0.135067	NO	49	4	AGVLLNLSSLEK	94	HSTTSYLDQLHK	57	LILVANRDEYFK	40
110765973	NP_001036440.1	FBgn0040007	K02923	0.894942	0.571356	0.440297	0.699956	0.140295	0.55931	0.506791	0.335821	0.28423	0.0449491	-0.0374148	0.126335	-0.385195	0.050878	0.00638075	-0.0901627	0.872887	NO	54	1	QSLPPGLQVK	53	0	#N/A	0	#N/A
110766149	NP_001033870.1	FBgn0028388	N/A	0.491533	0.898479	0.934512	0.785543	0.463402	0.0612505	0.270116	0.29284	-0.00804923	0.509398	0.568734	0.320741	-0.0457258	-0.824621	-0.342329	-0.178147	0.513637	NO	34	9	AWIQTLSDLQQYVR	94	IGGDVAIHSK	49	SSEMNVMVPK	85
110766174	NP_651221.1	FBgn0039156	N/A	0.582341	0.451242	0.617318	0.461708	0.379712	0.357287	0.769571	0.353472	0.251482	-0.130838	0.354668	-0.0910925	-0.523481	-0.518239	0.996279	-0.338778	0.989473	NO	14	4	MVASNMMDIYK	80	YDYLHDYDISNLK	31	ELIIN	27
110766509	NP_476853.1	FBgn0000181	K01527	0.768231	0.201972	0.334802	0.913537	0.756686	0.360111	0.69646	0.0201149	0.325671	-0.423998	-0.18814	0.565964	0.443424	-0.205491	0.296092	-0.813522	0.426269	NO	21	2	RLASTVSGSTVGK	43	QITDMLPGIISQLGPEGVTQLK	82	0	#N/A
110766532	NP_996253.1	#N/A	N/A	0.70388	0.26806	0.94389	0.222288	0.437185	0.74911	0.47433	0.0524991	0.139975	-0.177977	0.462421	-0.205188	-0.0625599	0.276321	-0.025713	-0.407279	0.468725	NO	57	10	LAGHSLEDAIK	39	SEIDLGDIK	60	SELGGNFEK	29
110766548	NP_611242.1	FBgn0034258	K03252	0.860355	0.652836	0.356739	0.939773	0.0141017	0.217214	0.431399	0.98378	0.243091	0.0852277	-0.0758964	0.34975	-0.741149	-0.228265	-0.0577647	0.425006	0.108196	NO	36	4	ELLAQGLLPQR	30	DMSSMLSSFEDLMR	127	LAEMFQLK	52
110766823	NP_524421.1	FBgn0019936	K02969	0.869452	0.195369	0.382127	0.984355	0.0181055	0.238352	0.723865	0.93375	0.249567	-0.228134	-0.0732938	0.551841	-0.7658	-0.255495	0.205551	0.315763	0.119288	NO	50	2	RVIDLYSPSEIVK	68	VIDLYSPSEIVK	43	0	#N/A
110766827	NP_573130.1	FBgn0004925	K03237	0.429856	0.303606	0.769349	0.541403	0.215819	0.8415	0.141309	0.567201	-0.0643014	-0.258531	0.294591	0.0398139	-0.459077	1.10769	-0.724276	0.0640911	0.804061	NO	17	2	ASAYDFFK	50	AGLALSTDELPIK	105	0	#N/A
110767080	NP_511073.1	FBgn0004922	K02991	0.896742	0.919735	0.374005	0.750871	0.167345	0.294061	0.254692	0.544798	0.598741	0.740232	-0.169653	0.330138	-0.737628	-0.357042	-0.452885	0.0480979	0.635438	NO	42	2	LFNLSK	34	LITPLTLQR	44	0	#N/A
110767168	NP_572339.1	FBgn0028336	K01679	0.358071	0.486379	0.189524	0.783781	0.12418	0.507759	0.848166	0.737096	-0.0986485	-0.0104862	-0.264637	0.231533	-0.507357	0.00845228	0.47206	0.169084	0.823416	NO	54	6	VLLPGLEK	38	IADITGLPFVPVANK	31	LYQLALGGTAVGTGLNAPK	36
110767398	NP_476691.1	FBgn0003150	K02728	0.830519	0.501472	0.402489	0.918591	0.805821	0.188054	0.393739	0.309783	0.466872	0.00197112	-0.137804	0.934627	0.576787	-1.29942	-0.236402	-0.306626	0.803255	NO	15	3	LLDEVYYSEK	70	ILPMSEVDALIAEHDRLEALAEQAK	62	TTIFSPEGR	39
110767655	NP_611878.1	FBgn0034967	K03263	0.628634	0.899063	0.436272	0.96319	0.152205	0.242967	0.0360163	0.989288	0.106607	0.466205	-0.0546094	0.646686	-0.486272	-0.372915	-1.02417	0.718471	0.0956789	NO	50	3	NGFVMLK	50	IPDGELGAQLR	34	IVEMSTSK	46
110768018	NP_001014552.1	#N/A	K10352	0.440951	0.695559	0.978147	0.0229037	0.583335	0.205482	0.514951	0.854674	-0.0448708	0.188679	0.663525	-0.733404	0.105006	-0.526679	0.0219375	0.325808	0.221139	NO	32	7	ELESQLAELQEDLEAEK	55	MIQALELDPNLYR	90	ATIQQLESK	65
110768336	NP_477054.1	FBgn0013325	K02868	0.835191	0.363056	0.13823	0.442485	0.264582	0.49361	0.819645	0.47624	0.334731	-0.132366	-0.441946	-0.059589	-0.314794	-0.00963933	0.643596	-0.0199924	0.851088	NO	35	2	YDGIIIAGKK	25	VLEQLTGQQPVFSK	115	0	#N/A
110768518	NP_610831.1	FBgn0033787	N/A	0.612438	0.623671	0.717383	0.871919	0.525724	0.30939	0.182017	0.347187	0.0675184	0.0833869	0.152279	0.281038	0.0236067	-0.183046	-0.336466	-0.0883176	0.916931	NO	58	5	DLDGMILVVGR	104	AYHNGDMLPAK	59	YFVPGMISVGK	78
110768681	NP_608705.1	FBgn0031452	N/A	0.884992	0.51636	0.352928	0.616779	0.671147	0.261669	0.131658	0.81684	0.906825	0.0376653	-0.350139	0.319254	0.585766	-0.650102	-1.47775	0.628475	0.783578	NO	21	1	MGGGDLNLK	66	0	#N/A	0	#N/A
110773271	NP_610910.1	FBgn0033879	K07511	0.398737	0.0462673	0.627349	0.9547	0.524179	0.246926	0.220309	0.988557	-0.0312654	-0.233461	0.04435	0.217901	0.0115348	-0.130714	-0.148452	0.270106	0.133069	NO	58	11	LIAEAIK	39	FDTNNNIGAIIITGSEK	54	EGMTAFIEK	76
110773823	NP_001027226.1	FBgn0260439	K03456	0.977627	0.255018	0.708634	0.355312	0.273511	0.780013	0.0595328	0.644886	0.649105	-0.270498	0.190361	-0.146046	-0.323524	0.44383	-0.650507	0.10728	0.345755	NO	31	5	FNQESIIMTQILPIVK	36	ADLIPMFVILAQDEQDSVR	61	TDLVPAFQVLLK	48
110775155	NP_477421.1	#N/A	N/A	0.100835	0.847867	0.831798	0.236717	0.916355	0.09614	0.543454	0.437939	-0.717252	0.678206	0.553712	-0.358681	0.954473	-1.11831	0.0884727	-0.0806259	0.465086	NO	27	2	IEEELGSSAK	96	YNQILR	46	0	#N/A
110775987	NP_647640.1	FBgn0035251	K12199	0.954663	0.904591	0.826623	0.394178	0.769248	0.0609405	0.0113215	0.748621	0.77776	0.703726	0.639683	-0.142188	0.510317	-1.17388	-1.56798	0.252564	0.157298	NO	16	1	VNLDLPEIPLSLK	66	0	#N/A	0	#N/A
110776452	NP_476566.1	#N/A	N/A	0.16124	0.14715	0.677379	0.451794	0.241795	0.9717	0.653491	0.236877	-0.304949	-0.360964	0.155618	-0.0380999	-0.33529	0.905984	0.184697	-0.206997	0.511506	NO	57	1	DADILTFVVPHQFIK	77	0	#N/A	0	#N/A
110777081	NP_650256.2	FBgn0038115	N/A	0.497316	0.642514	0.0534062	0.994118	0.44477	0.0991914	0.528274	0.69442	-0.00281129	0.204589	-0.749783	1.26492	-0.0791257	-0.900379	0.0533534	0.209234	0.166637	NO	31	4	QVLNLGEDGIAPLEVR	141	GYATTDIADPAIYGR	117	VYFIDTSSER	27
110777438	NP_476565.1	FBgn0001128	K00006	0.821435	0.0356142	0.785681	0.259019	0.625104	0.818311	0.19272	0.693218	0.680297	-1.55732	0.687964	-0.545975	0.353506	1.00867	-0.973454	0.346304	0.444668	NO	43	1	LQGPFTAEEVNYMLK	107	0	#N/A	0	#N/A
110777451	NP_476565.1	FBgn0001128	K00006	0.0699823	0.0813984	0.874692	0.115446	0.825489	0.86357	0.903762	0.0141235	-0.393815	-0.414295	0.340541	-0.331049	0.379911	0.44851	0.535317	-0.56512	0.0812013	NO	58	1	LGLMEIIK	73	0	#N/A	0	#N/A
110777459	NP_572375.1	FBgn0027108	N/A	0.805678	0.735829	0.743436	0.501382	0.507205	0.215365	0.269255	0.562929	1.10599	0.977883	0.910207	0.00528944	0.0321849	-1.84211	-1.38476	0.195322	0.954972	NO	15	2	NIDPVVYQQLVVDLATK	61	MFDVFGSVK	58	0	#N/A
110777654	NP_611543.3	FBgn0034582	N/A	0.753561	0.905951	0.725992	0.464515	0.0466943	0.372953	0.542514	0.575536	0.249608	0.535431	0.243319	-0.0336041	-0.93977	-0.180366	0.0594089	0.065973	0.700611	NO	58	4	GLYGEK	25	YPLLNAINK	62	YPLLNAINKA	43
110777963	#N/A	#N/A	K01960	0.114542	0.235981	0.83207	0.0627847	0.938615	0.798505	0.812872	0.0209497	-0.8123	-0.651542	0.751143	-1.13424	1.44978	1.06562	0.810283	-1.47874	0.0934803	NO	21	3	EANLLLGDIIK	70	AASMLIDAIR	87	YYTDLADELVK	60
